# Supplementary material for: Origins of enantioselectivity in the chiral Brønsted acid catalyzed hydrophosphonylation of imines
Source: Royal Society of Chemistry journal article supplement (doi:10.1039/b815008g), 2009-01-01
Supplement: b815008g.pdf [file b815008g.pdf]

## Supporting Information

### Origins of enantioselectivity in chiral Brønsted acid catalyzed hydrophosphonylation of imines

Fu-Qiang Shi\* and Bao-An Song

*Key Laboratory of Green Pesticide and Agricultural Bioengineering, Ministry of Education,  
Center for Research and Development of Fine Chemicals, Guizhou University, Huaxi District,  
Guiyang 550025, PR China*

| Content                                                                               | page |
|---------------------------------------------------------------------------------------|------|
| Discussion of computational methods; ONIOM evaluation                                 | 2    |
| Selected topological parameters at bond critical points in <b>int1</b> and <b>TS4</b> | 4    |
| Optimized structures of the investigated system                                       | 5    |
| The cartesian coordinates of the stationary points discussed in the text              | 7    |

## ONIOM evaluation

**S-Table 1.** Selected distances (in Å) in the test complexes.

|                                      | <i>R-complex</i> |         |         | <i>S-complex</i> |         |         |
|--------------------------------------|------------------|---------|---------|------------------|---------|---------|
|                                      | N-H...O          | O-H...O | C-H...O | N-H...O          | O-H...O | C-H...O |
| B3LYP/6-31G*                         | 1.597            | 1.756   | 2.525   | 1.593            | 1.790   | 2.375   |
| B3LYP/6-31G*/ HF/STO-3G <sup>a</sup> | 1.537            | 1.777   | 2.379   | 1.518            | 1.804   | 2.415   |
| B3LYP/6-31G*/ AM1 <sup>a</sup>       | 1.654            | 1.767   | 2.362   | 1.672            | 1.780   | 2.251   |
| B3LYP/6-31G*/ AM1 <sup>b</sup>       | 1.605            | 1.753   | 2.384   | 1.615            | 1.752   | 2.275   |
| B3LYP/D95**/ AM1 <sup>b</sup>        | 1.540            | 1.708   | 2.240   | 1.546            | 1.718   | 2.293   |

<sup>a</sup> Part imine was treated at the B3LYP/6-31G\* level (**a** in **S-Figure 1**).

<sup>b</sup> Whole imine was treated at the B3LYP/6-31G\* level (**b** in **S-Figure 1**).

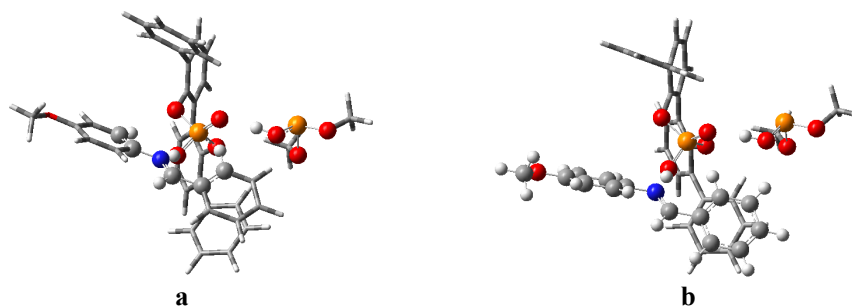

**S-Figure 1.** The test *R*-complex. (high layer is shown ball and bond type and low layer is shown in tube type)

**S-Table 2.** The energy difference (kcal/mol) computed at the B3LYP/D95\*\* levels.

|                                | $E_R$ (au)    | $E_S$ (au)    | $\Delta E$ (kcal/mol) |
|--------------------------------|---------------|---------------|-----------------------|
| B3LYP/6-31G*                   | -2886.2666954 | -2886.2628500 | 2.413                 |
| B3LYP/6-31G*/ AM1 <sup>a</sup> | -2886.2401161 | -2886.2397281 | 0.243                 |
| B3LYP/6-31G*/ AM1 <sup>b</sup> | -2886.2452782 | -2886.2425108 | 1.737                 |
| B3LYP/D95**/ AM1 <sup>b</sup>  | -2886.2455694 | -2886.2448364 | 0.460                 |

Both combinations of B3LYP/6-31G\* with HF/STO-3G and AM1 reproduce the results from density functional theory (B3LYP/6-31G\*). In contrast, the combination of B3LYP/6-31G\* with B3LYP/STO-3G fail since it optimized the test complex to a zwitterionic complex of iminium salt. Among all the test combinations, B3LYP/6-31G\*/ AM1<sup>b</sup> gives the best result.

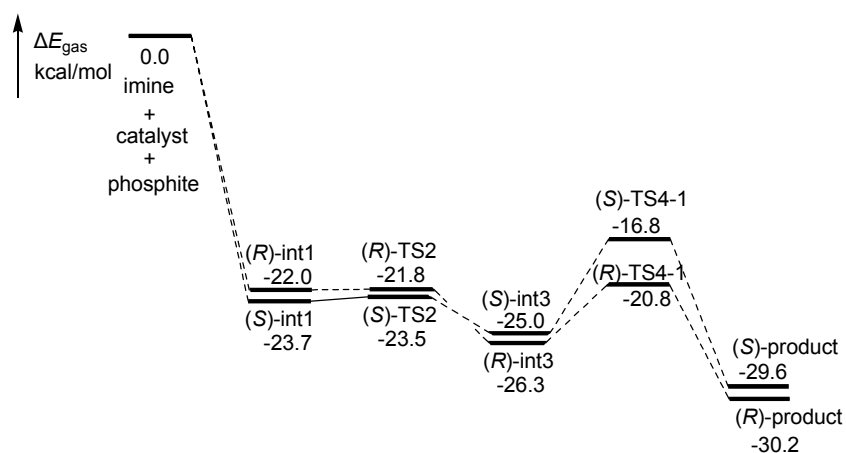

**S-Figure 2.** Potential energy surfaces of chiral Brønsted acid catalyzed enantioselective hydrophosphonylation of aldimine in dicoordination pathway (kcal/mol in terms of electronic energy).

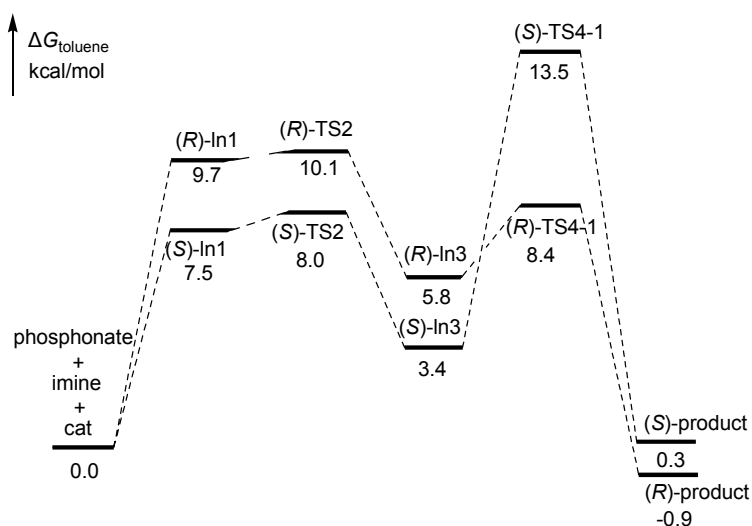

**S-Figure 3.** Potential energy surfaces of chiral Brønsted acid catalyzed enantioselective hydrophosphonylation of aldimine in dicoordination pathway (Part imine was treated at the B3LYP/D95\*\* level, a in S-Figure 1).

Selected topological parameters at bond critical points in **int1** and **TS4**

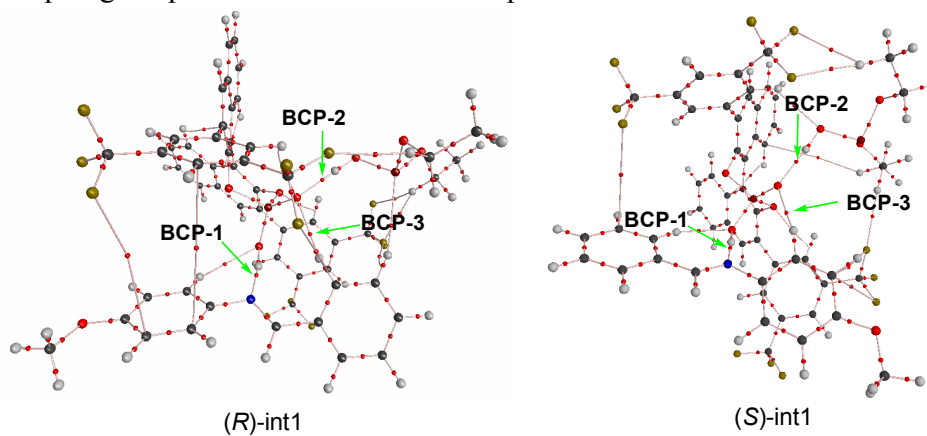

|       | <i>(R)</i> -int1 (au) |                  | <i>(S)</i> -int1 (au) |                  |
|-------|-----------------------|------------------|-----------------------|------------------|
|       | <i>charge density</i> | <i>Laplacian</i> | <i>charge density</i> | <i>Laplacian</i> |
| BCP-1 | 0.1006                | -0.0021          | 0.1059                | -0.0248          |
| BCP-2 | 0.0342                | 0.1062           | 0.0349                | 0.1098           |
| BCP-3 | 0.0116                | 0.0428           | 0.0133                | 0.0495           |

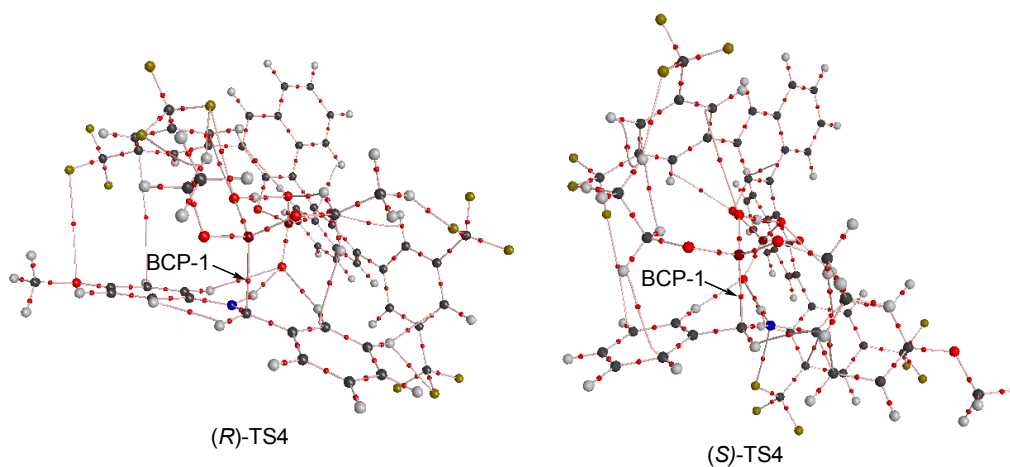

|       | <i>(R)</i> -TS4 (au)  |                  | <i>(S)</i> -TS4 (au)  |                  |
|-------|-----------------------|------------------|-----------------------|------------------|
|       | <i>charge density</i> | <i>Laplacian</i> | <i>charge density</i> | <i>Laplacian</i> |
| BCP-1 | 0.0583                | 0.0383           | 0.0708                | 0.0190           |

### Optimized structures of the investigated system

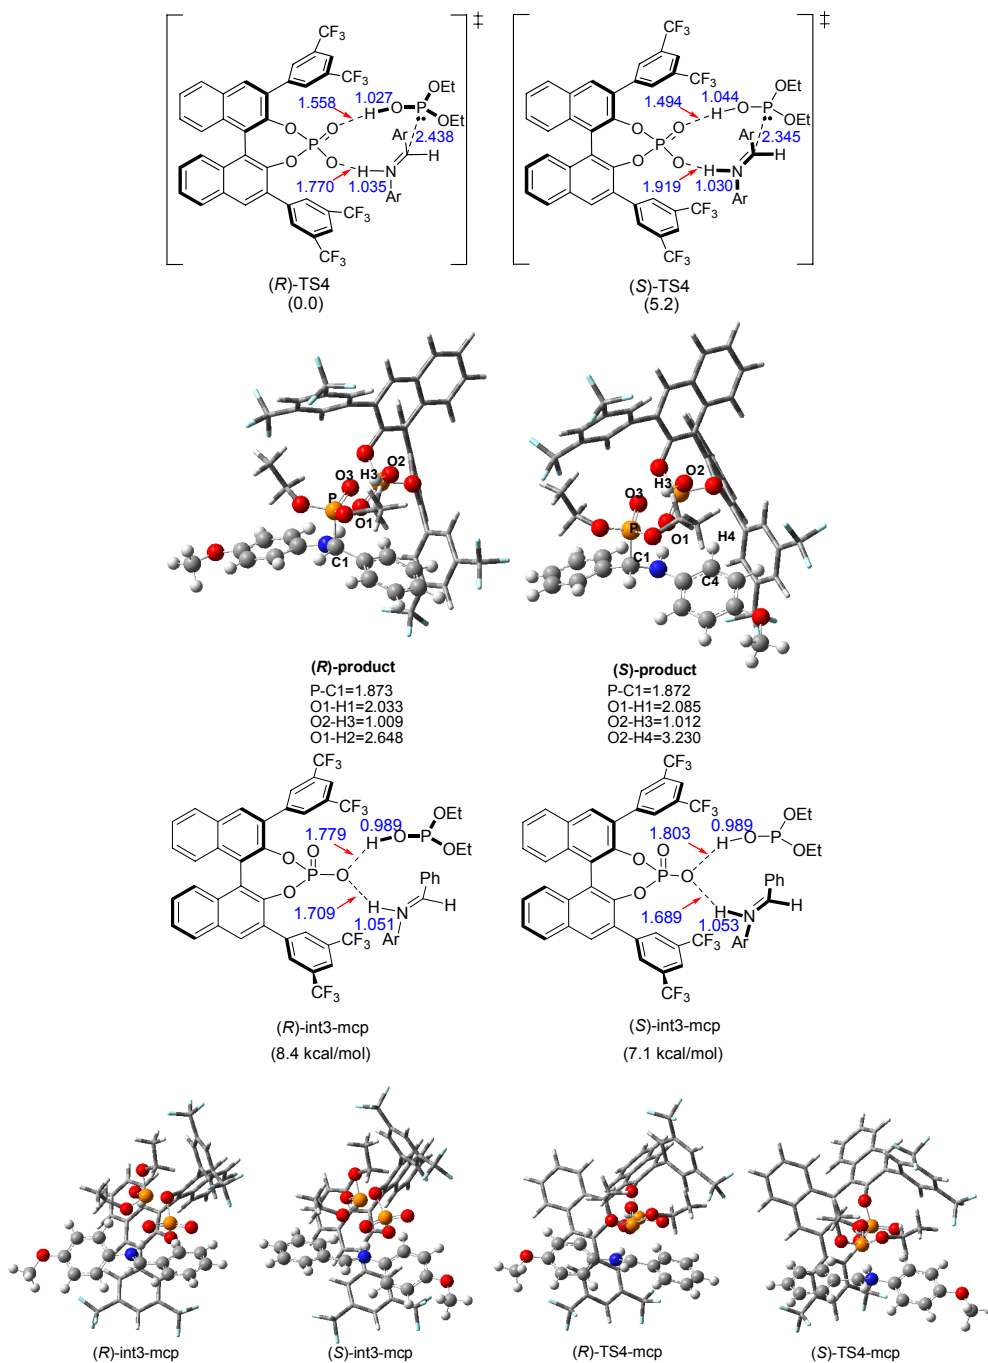

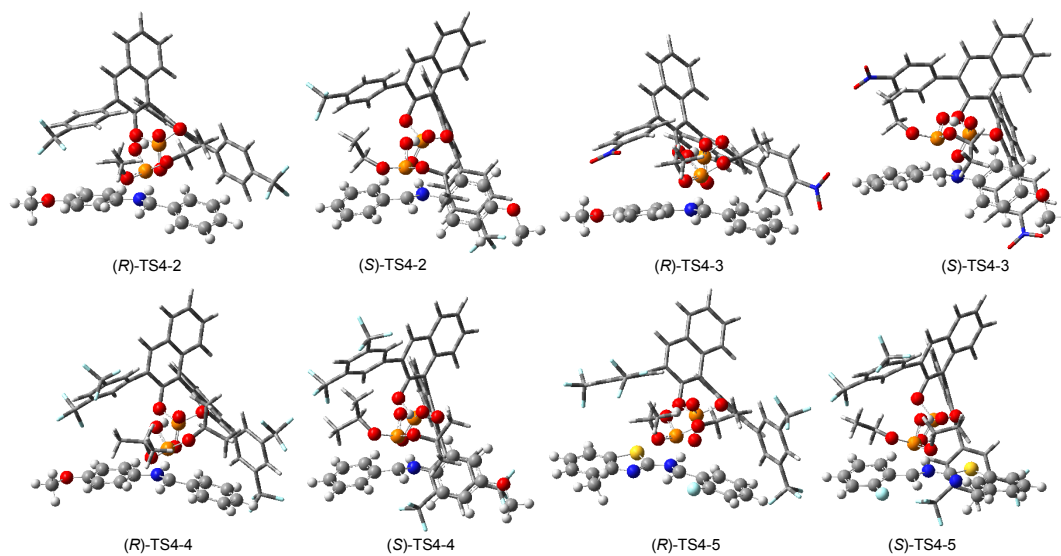

### Cartesian coordinates

| Catalyst |           |           |           | diethyl phosphite |           |           |           |
|----------|-----------|-----------|-----------|-------------------|-----------|-----------|-----------|
| C        | 2.190211  | 5.266865  | -2.741303 | P                 | 0.033055  | 0.011241  | -0.116104 |
| C        | 3.012732  | 4.241149  | -2.347262 | O                 | 0.020738  | -0.003972 | 1.583831  |
| C        | 2.517848  | 3.192906  | -1.522379 | O                 | 1.675869  | -0.023168 | -0.327439 |
| C        | 1.169399  | 3.223679  | -1.083835 | O                 | -0.420874 | 1.583898  | -0.414862 |
| C        | 0.339396  | 4.294587  | -1.520642 | C                 | 2.677694  | 0.538251  | 0.549838  |
| C        | 0.836693  | 5.287531  | -2.328542 | H                 | 2.335271  | 0.485648  | 1.588810  |
| H        | 4.411465  | 2.128293  | -1.465015 | H                 | 2.831419  | 1.592818  | 0.283361  |
| H        | 2.568464  | 6.076839  | -3.382905 | C                 | 3.969580  | -0.248739 | 0.364472  |
| H        | 4.065705  | 4.206875  | -2.666370 | H                 | 4.762921  | 0.178071  | 0.990694  |
| C        | 3.356451  | 2.113389  | -1.145219 | H                 | 3.827076  | -1.296562 | 0.649131  |
| C        | 0.678207  | 2.169237  | -0.253018 | H                 | 4.296222  | -0.215961 | -0.680378 |
| H        | -0.715814 | 4.309272  | -1.203834 | C                 | 0.096482  | 2.743671  | 0.269946  |
| H        | 0.186414  | 6.10859   | -2.667074 | H                 | 1.030384  | 3.053542  | -0.218586 |
| C        | 1.502100  | 1.07138   | 0.007675  | H                 | 0.313579  | 2.495478  | 1.316237  |
| C        | 2.875858  | 1.061217  | -0.395572 | C                 | -0.939369 | 3.858927  | 0.186865  |
| C        | -0.702955 | 2.178446  | 0.244309  | H                 | -0.554067 | 4.768421  | 0.664353  |
| C        | -1.198644 | 3.248866  | 1.050515  | H                 | -1.174850 | 4.088711  | -0.857746 |
| C        | -1.526641 | 1.076254  | 0.001014  | H                 | -1.865546 | 3.566160  | 0.692895  |
| C        | -0.370793 | 4.327322  | 1.472223  | H                 | -0.787772 | -0.434468 | 1.895777  |
| C        | -2.550987 | 3.226631  | 1.478491  |                   |           |           |           |
| C        | -2.904364 | 1.074312  | 0.388939  |                   |           |           |           |
| C        | -0.873116 | 5.335242  | 2.258074  |                   |           |           |           |
| H        | 0.686097  | 4.335017  | 1.160731  |                   |           |           |           |
| C        | -3.050448 | 4.290393  | 2.280564  |                   |           |           |           |
| C        | -3.388904 | 2.141794  | 1.114241  |                   |           |           |           |
| C        | -2.229583 | 5.322349  | 2.661675  |                   |           |           |           |
| H        | -0.225005 | 6.162326  | 2.585884  |                   |           |           |           |
| H        | -4.105618 | 4.262739  | 2.593159  |                   |           |           |           |
| H        | -4.446538 | 2.164487  | 1.42493   |                   |           |           |           |
| H        | -2.611694 | 6.143895  | 3.286153  |                   |           |           |           |
| O        | -1.070005 | -0.005518 | -0.741752 |                   |           |           |           |
| O        | 1.070509  | -0.000933 | 0.774121  |                   |           |           |           |
| P        | -0.048999 | -1.041342 | 0.090451  |                   |           |           |           |
| O        | -0.583027 | -1.980071 | 1.104839  |                   |           |           |           |
| O        | 0.63432   | -1.736601 | -1.204695 |                   |           |           |           |
| H        | 0.725099  | -2.690075 | -1.044549 |                   |           |           |           |
| C        | -3.795651 | -0.024421 | 0.017703  |                   |           |           |           |
| C        | -4.670763 | -0.569086 | 0.968145  |                   |           |           |           |
| C        | -3.806403 | -0.520257 | -1.293535 |                   |           |           |           |
| C        | -5.551088 | -1.588145 | 0.601439  |                   |           |           |           |

|   |           |           |           |
|---|-----------|-----------|-----------|
| H | -4.662741 | -0.197152 | 2.006739  |
| C | -4.691056 | -1.541729 | -1.643991 |
| H | -3.111309 | -0.104354 | -2.044669 |
| C | -5.569651 | -2.082391 | -0.703892 |
| H | -6.273773 | -2.883096 | -0.988688 |
| C | 3.774534  | -0.027021 | -0.010486 |
| C | 4.635455  | -0.592017 | -0.961364 |
| C | 3.812717  | -0.486676 | 1.314130  |
| C | 5.527407  | -1.597775 | -0.584591 |
| H | 4.603691  | -0.25123  | -2.010084 |
| C | 4.711720  | -1.491052 | 1.675436  |
| H | 3.126627  | -0.055126 | 2.065320  |
| C | 5.575764  | -2.05305  | 0.733461  |
| H | 6.285551  | -2.845368 | 1.027658  |
| C | -4.681801 | -2.080416 | -3.070542 |
| C | -6.496306 | -2.180669 | 1.641434  |
| C | 6.473155  | -2.189692 | -1.624083 |
| C | 4.746989  | -1.993357 | 3.115657  |
| F | -3.717547 | -3.031477 | -3.302283 |
| F | -4.453933 | -1.127457 | -4.033107 |
| F | -5.852041 | -2.683753 | -3.461034 |
| F | -7.699495 | -2.606975 | 1.133486  |
| F | -5.997017 | -3.279501 | 2.295654  |
| F | -6.843359 | -1.313924 | 2.649506  |
| F | 6.873987  | -3.476597 | -1.363016 |
| F | 7.647877  | -1.491662 | -1.770466 |
| F | 5.954759  | -2.245017 | -2.894857 |
| F | 5.985854  | -2.412431 | 3.536558  |
| F | 3.927964  | -3.070344 | 3.351220  |
| F | 4.367295  | -1.063263 | 4.051287  |

(R)-int1

|   |           |           |           |
|---|-----------|-----------|-----------|
| C | 0.46618   | -7.247457 | -2.007983 |
| C | 1.44236   | -6.552117 | -1.339451 |
| C | 1.406818  | -5.130971 | -1.279437 |
| C | 0.366802  | -4.427522 | -1.938924 |
| C | -0.63741  | -5.179415 | -2.61245  |
| C | -0.589109 | -6.551291 | -2.644211 |
| H | 3.215122  | -4.976584 | -0.084655 |
| H | 0.488727  | -8.346455 | -2.05353  |
| H | 2.265927  | -7.079133 | -0.834003 |
| C | 2.394129  | -4.413477 | -0.557824 |
| C | 0.338014  | -2.999653 | -1.881345 |

(S)-int1

|   |           |           |           |
|---|-----------|-----------|-----------|
| O | 0.795229  | -0.692256 | -1.499687 |
| H | 0.989653  | -1.772615 | -1.4156   |
| N | 1.365855  | -3.161899 | -1.440911 |
| C | 0.944377  | 6.038174  | -4.358022 |
| C | 1.941749  | 5.301829  | -3.769219 |
| C | 1.637892  | 4.353023  | -2.753502 |
| C | 0.293889  | 4.185263  | -2.332372 |
| C | -0.718198 | 4.957838  | -2.969443 |
| C | -0.400847 | 5.857763  | -3.956778 |
| H | 3.706992  | 3.751567  | -2.469112 |
| H | 1.175713  | 6.769873  | -5.146353 |



|   |           |           |           |   |           |           |           |
|---|-----------|-----------|-----------|---|-----------|-----------|-----------|
| H | -1.460997 | -4.638077 | -3.105236 | H | 2.991783  | 5.427236  | -4.074356 |
| H | -1.372387 | -7.124791 | -3.16269  | C | 2.663622  | 3.571385  | -2.163158 |
| C | 1.264906  | -2.335557 | -1.072498 | C | -0.008354 | 3.229787  | -1.314075 |
| C | 2.340136  | -3.040999 | -0.442886 | H | -1.765122 | 4.814978  | -2.656373 |
| C | -0.704295 | -2.234446 | -2.577577 | H | -1.189532 | 6.447034  | -4.44863  |
| C | -0.887454 | -2.332446 | -3.990826 | C | 1.009152  | 2.392683  | -0.84791  |
| C | -1.474602 | -1.316885 | -1.856765 | C | 2.374453  | 2.606293  | -1.222851 |
| C | -0.035112 | -3.121842 | -4.813817 | C | -1.375691 | 3.049429  | -0.811093 |
| C | -1.928455 | -1.593164 | -4.609099 | C | -2.094363 | 4.126024  | -0.206277 |
| C | -2.550493 | -0.603901 | -2.472146 | C | -1.945023 | 1.772963  | -0.81963  |
| C | -0.227547 | -3.184617 | -6.171858 | C | -1.52439  | 5.419458  | -0.035411 |
| H | 0.791078  | -3.67553  | -4.339856 | C | -3.4076   | 3.898336  | 0.279465  |
| C | -2.114912 | -1.686261 | -6.016521 | C | -3.283227 | 1.553048  | -0.366618 |
| C | -2.762422 | -0.755221 | -3.824269 | C | -2.235215 | 6.430084  | 0.563378  |
| C | -1.283254 | -2.465442 | -6.781267 | H | -0.494433 | 5.59374   | -0.38506  |
| H | 0.441311  | -3.789877 | -6.802334 | C | -4.127005 | 4.965349  | 0.88652   |
| H | -2.932787 | -1.111534 | -6.477427 | C | -3.985386 | 2.606904  | 0.175137  |
| H | -3.581969 | -0.211365 | -4.321581 | C | -3.554221 | 6.204841  | 1.024155  |
| H | -1.420372 | -2.533577 | -7.870746 | H | -1.784314 | 7.424897  | 0.697679  |
| O | -1.294283 | -1.162391 | -0.488148 | H | -5.14657  | 4.769863  | 1.252685  |
| O | 1.269535  | -0.954619 | -0.943199 | H | -5.011055 | 2.453977  | 0.548783  |
| P | 0.043476  | -0.251737 | -0.075373 | H | -4.10542  | 7.029976  | 1.499039  |
| O | -0.04536  | 1.185908  | -0.454685 | O | -1.272053 | 0.693166  | -1.377045 |
| O | 0.249089  | -0.596741 | 1.424047  | O | 0.764194  | 1.401466  | 0.091016  |
| H | -0.230233 | 0.008117  | 2.194578  | P | -0.056221 | 0.050605  | -0.433773 |
| N | -0.884816 | 0.558774  | 3.377275  | O | -0.485126 | -0.731627 | 0.755314  |
| C | -3.43215  | 0.264355  | -1.684008 | C | -3.909429 | 0.232588  | -0.469218 |
| C | -3.063136 | 1.581942  | -1.378048 | C | -4.277073 | -0.464537 | 0.690421  |
| C | -4.667987 | -0.231524 | -1.24967  | C | -4.16938  | -0.321998 | -1.728867 |
| C | -3.938344 | 2.389254  | -0.647462 | C | -4.928537 | -1.695516 | 0.576865  |
| H | -2.080622 | 1.9812    | -1.697864 | H | -4.033358 | -0.053474 | 1.690765  |
| C | -5.53151  | 0.590557  | -0.523098 | C | -4.822428 | -1.55188  | -1.823178 |
| H | -4.956854 | -1.272146 | -1.473089 | H | -3.852112 | 0.212942  | -2.639933 |
| C | -5.17525  | 1.904501  | -0.218492 | C | -5.209713 | -2.244741 | -0.674425 |
| H | -5.861321 | 2.551201  | 0.354164  | H | -5.73518  | -3.210901 | -0.759262 |
| C | 3.381725  | -2.33168  | 0.300486  | C | 3.454499  | 1.840069  | -0.601483 |
| C | 3.789823  | -2.807531 | 1.553899  | C | 4.475891  | 1.292816  | -1.389099 |
| C | 3.999628  | -1.194627 | -0.24147  | C | 3.49346   | 1.674997  | 0.791203  |
| C | 4.81067   | -2.156731 | 2.24934   | C | 5.524384  | 0.595924  | -0.784975 |
| H | 3.298282  | -3.68896  | 1.998727  | H | 4.446809  | 1.399597  | -2.486446 |
| C | 5.020364  | -0.557171 | 0.465479  | C | 4.552696  | 0.983146  | 1.380458  |

|   |           |           |           |   |           |           |           |
|---|-----------|-----------|-----------|---|-----------|-----------|-----------|
| H | 3.669308  | -0.804359 | -1.221932 | H | 2.675198  | 2.079402  | 1.414402  |
| C | 5.4347    | -1.03067  | 1.712176  | C | 5.574343  | 0.43821   | 0.600583  |
| H | 6.242691  | -0.520877 | 2.26395   | H | 6.402953  | -0.117728 | 1.071405  |
| C | -0.436035 | 1.522829  | 4.111634  | C | 1.11935   | -3.994569 | -2.396911 |
| H | -0.854402 | 1.651841  | 5.115823  | H | 1.45228   | -5.030107 | -2.272284 |
| C | 0.604423  | 2.471633  | 3.7371    | C | 0.423662  | -3.725102 | -3.651577 |
| C | 1.216341  | 3.211352  | 4.767584  | C | 0.20347   | -4.826118 | -4.501892 |
| C | 0.989515  | 2.702192  | 2.402635  | C | -0.02505  | -2.451548 | -4.054958 |
| C | 2.215418  | 4.134726  | 4.476741  | C | -0.451152 | -4.66827  | -5.719777 |
| H | 0.909402  | 3.048304  | 5.798343  | H | 0.548102  | -5.811675 | -4.197315 |
| C | 1.979034  | 3.63775   | 2.114634  | C | -0.677409 | -2.300429 | -5.27388  |
| H | 0.497402  | 2.18196   | 1.588593  | H | 0.136099  | -1.588211 | -3.420761 |
| C | 2.596911  | 4.347986  | 3.14918   | C | -0.893481 | -3.402333 | -6.108105 |
| H | 2.689111  | 4.692683  | 5.279596  | H | -0.617013 | -5.528251 | -6.362264 |
| H | 2.250132  | 3.820991  | 1.077377  | H | -1.022152 | -1.315766 | -5.576164 |
| H | 3.368568  | 5.07799   | 2.918513  | H | -1.406926 | -3.27293  | -7.057039 |
| C | -1.98677  | -0.218645 | 3.816172  | C | 2.139335  | -3.583858 | -0.325291 |
| C | -3.063723 | 0.335418  | 4.51902   | C | 3.259807  | -4.410497 | -0.469628 |
| C | -2.016356 | -1.588796 | 3.498161  | C | 1.78243   | -3.128916 | 0.956407  |
| C | -4.134883 | -0.457288 | 4.932108  | C | 4.001946  | -4.809513 | 0.64235   |
| H | -3.092613 | 1.404174  | 4.711151  | H | 3.586377  | -4.713985 | -1.460425 |
| C | -3.071506 | -2.382801 | 3.915947  | C | 2.509822  | -3.533567 | 2.064374  |
| H | -1.198733 | -2.02206  | 2.932714  | H | 0.921973  | -2.478123 | 1.077781  |
| C | -4.139365 | -1.827133 | 4.639964  | C | 3.622188  | -4.379328 | 1.920365  |
| H | -4.962033 | 0.005259  | 5.458118  | H | 4.875461  | -5.434965 | 0.49828   |
| H | -3.098232 | -3.443111 | 3.686184  | H | 2.234976  | -3.201532 | 3.060609  |
| P | 2.031192  | 3.82597   | -1.892717 | P | -1.285914 | 0.002475  | 4.290478  |
| O | 1.603136  | 2.33228   | -2.377899 | O | -2.113697 | -0.049884 | 2.883866  |
| O | 0.796035  | 4.698466  | -2.610734 | O | -2.598097 | 0.042567  | 5.329064  |
| O | 3.237356  | 4.09622   | -3.013756 | O | -0.910193 | 1.63335   | 4.311361  |
| C | 0.452677  | 5.864128  | -1.885735 | C | -2.720602 | -1.145279 | 6.090213  |
| C | 0.755447  | 7.102603  | -2.703204 | C | -4.038889 | -1.824253 | 5.784128  |
| H | 0.989447  | 5.896527  | -0.900051 | H | -2.700029 | -0.83513  | 7.174746  |
| H | -0.658509 | 5.798577  | -1.69407  | H | -1.860425 | -1.83971  | 5.894241  |
| H | 0.332834  | 7.999184  | -2.190947 | H | -4.157314 | -2.719468 | 6.439195  |
| H | 1.854775  | 7.243332  | -2.830661 | H | -4.884348 | -1.119639 | 5.97058   |
| H | 0.297398  | 7.010868  | -3.717098 | H | -4.090349 | -2.145834 | 4.714708  |
| C | 4.477793  | 4.152343  | -2.327976 | C | 0.291063  | 1.798087  | 5.0488    |
| C | 5.555006  | 4.451275  | -3.34417  | C | 0.595008  | 3.276385  | 5.118126  |
| H | 4.65959   | 3.164687  | -1.820392 | H | 1.115896  | 1.236653  | 4.530321  |
| H | 4.426745  | 4.954853  | -1.543137 | H | 0.151055  | 1.366806  | 6.076543  |

|   |           |           |           |   |           |           |           |
|---|-----------|-----------|-----------|---|-----------|-----------|-----------|
| H | 6.545811  | 4.493525  | -2.833344 | H | 1.54305   | 3.434813  | 5.684346  |
| H | 5.577903  | 3.655632  | -4.126605 | H | 0.705398  | 3.697319  | 4.090513  |
| H | 5.356285  | 5.428614  | -3.844767 | H | -0.235292 | 3.818406  | 5.630331  |
| H | 1.004376  | 1.911968  | -1.716395 | H | -1.519939 | -0.310889 | 2.140055  |
| C | -6.884246 | 0.056828  | -0.068943 | C | -5.121356 | -2.163931 | -3.185317 |
| C | -3.541173 | 3.816703  | -0.287281 | C | -5.327115 | -2.451394 | 1.839383  |
| C | 5.258801  | -2.693345 | 3.603617  | C | 6.636758  | 0.014389  | -1.649334 |
| C | 5.688754  | 0.683014  | -0.117021 | C | 4.601627  | 0.840079  | 2.897818  |
| F | -6.934973 | -1.304792 | 0.103441  | F | -4.34776  | -3.257431 | -3.493742 |
| F | -7.913631 | 0.322389  | -0.940202 | F | -4.944972 | -1.317428 | -4.252497 |
| F | -7.322352 | 0.564914  | 1.130382  | F | -6.410322 | -2.619376 | -3.327854 |
| F | -4.596423 | 4.696977  | -0.229817 | F | -6.315335 | -3.389471 | 1.652269  |
| F | -2.946526 | 3.936366  | 0.94644   | F | -4.305532 | -3.15927  | 2.423555  |
| F | -2.656838 | 4.408596  | -1.152226 | F | -5.81008  | -1.65558  | 2.848483  |
| F | 5.770026  | -1.743443 | 4.453574  | F | 7.245856  | -1.098973 | -1.12377  |
| F | 6.24783   | -3.645038 | 3.528617  | F | 7.674237  | 0.884248  | -1.886606 |
| F | 4.26543   | -3.301008 | 4.332319  | F | 6.237362  | -0.379271 | -2.903338 |
| F | 7.017029  | 0.815596  | 0.210156  | F | 5.339843  | -0.227174 | 3.347769  |
| F | 5.125719  | 1.86823   | 0.293353  | F | 3.37506   | 0.681093  | 3.494589  |
| F | 5.667855  | 0.758368  | -1.48695  | F | 5.151292  | 1.922917  | 3.541864  |
| O | -5.128129 | -2.692747 | 4.992864  | O | 4.268142  | -4.708996 | 3.071684  |
| C | -6.250971 | -2.185585 | 5.699614  | C | 5.406847  | -5.55294  | 2.990749  |
| H | -6.789588 | -1.431518 | 5.110976  | H | 6.207657  | -5.093088 | 2.396811  |
| H | -6.904631 | -3.041812 | 5.873746  | H | 5.751435  | -5.687658 | 4.017382  |
| H | -5.957023 | -1.751078 | 6.664037  | H | 5.153509  | -6.531082 | 2.561154  |

(R)-TS2

|   |           |           |           |
|---|-----------|-----------|-----------|
| O | 0.266206  | -0.660089 | 1.373366  |
| H | -0.231706 | -0.129369 | 2.248938  |
| N | -0.831333 | 0.257148  | 3.406478  |
| C | 0.314499  | -7.067562 | -2.517932 |
| C | 1.312716  | -6.437596 | -1.818004 |
| C | 1.30384   | -5.023728 | -1.658209 |
| C | 0.267408  | -4.258006 | -2.250493 |
| C | -0.759997 | -4.943671 | -2.958989 |
| C | -0.737142 | -6.310505 | -3.087238 |
| H | 3.130714  | -4.984623 | -0.483139 |
| H | 0.316461  | -8.16082  | -2.640659 |
| H | 2.133964  | -7.012698 | -1.363871 |
| C | 2.313789  | -4.375527 | -0.903355 |
| C | 0.265901  | -2.83754  | -2.093381 |

(S)-TS2

|   |           |           |           |
|---|-----------|-----------|-----------|
| O | 0.811727  | -0.55384  | -1.529723 |
| H | 1.04828   | -1.665988 | -1.561838 |
| N | 1.444472  | -2.961665 | -1.714274 |
| C | 0.933622  | 6.430257  | -3.754814 |
| C | 1.930442  | 5.649541  | -3.225333 |
| C | 1.623029  | 4.606437  | -2.307851 |
| C | 0.275612  | 4.388676  | -1.921979 |
| C | -0.735704 | 5.209954  | -2.496405 |
| C | -0.414695 | 6.201821  | -3.38995  |
| H | 3.693797  | 3.996931  | -2.055616 |
| H | 1.167752  | 7.235212  | -4.467214 |
| H | 2.982928  | 5.811738  | -3.503442 |
| C | 2.648603  | 3.780689  | -1.780828 |
| C | -0.030034 | 3.339266  | -1.002155 |

|   |           |           |           |   |           |           |           |
|---|-----------|-----------|-----------|---|-----------|-----------|-----------|
| H | -1.580412 | -4.354892 | -3.399937 | H | -1.784937 | 5.029701  | -2.211638 |
| H | -1.53803  | -6.832763 | -3.632208 | H | -1.202678 | 6.828768  | -3.83396  |
| C | 1.216749  | -2.24658  | -1.255743 | C | 0.989385  | 2.470654  | -0.602066 |
| C | 2.286422  | -3.013681 | -0.691932 | C | 2.356904  | 2.729254  | -0.939015 |
| C | -0.772349 | -2.007513 | -2.717684 | C | -1.401661 | 3.100083  | -0.536858 |
| C | -0.977118 | -2.003016 | -4.13126  | C | -2.138598 | 4.108     | 0.157652  |
| C | -1.515873 | -1.130608 | -1.921691 | C | -1.957665 | 1.825056  | -0.673976 |
| C | -0.150727 | -2.746965 | -5.020509 | C | -1.583907 | 5.38451   | 0.45748   |
| C | -2.013626 | -1.205306 | -4.680433 | C | -3.455191 | 3.823673  | 0.602715  |
| C | -2.587749 | -0.358933 | -2.469983 | C | -3.29943  | 1.552031  | -0.261719 |
| C | -0.363729 | -2.711546 | -6.376423 | C | -2.311949 | 6.327421  | 1.140154  |
| H | 0.672315  | -3.345932 | -4.599064 | H | -0.55166  | 5.600248  | 0.139112  |
| C | -2.221857 | -1.196605 | -6.087864 | C | -4.192456 | 4.821786  | 1.298932  |
| C | -2.821496 | -0.411217 | -3.826006 | C | -4.018754 | 2.542953  | 0.368721  |
| C | -1.415234 | -1.934138 | -6.917859 | C | -3.633948 | 6.047717  | 1.560695  |
| H | 0.285171  | -3.282299 | -7.057821 | H | -1.87275  | 7.308976  | 1.373821  |
| H | -3.036    | -0.577571 | -6.494768 | H | -5.214218 | 4.583321  | 1.631943  |
| H | -3.638534 | 0.179445  | -4.271267 | H | -5.047256 | 2.346181  | 0.712754  |
| H | -1.569154 | -1.923771 | -8.007123 | H | -4.199008 | 6.81907   | 2.104599  |
| O | -1.313931 | -1.075876 | -0.549664 | O | -1.26752  | 0.808537  | -1.320427 |
| O | 1.247797  | -0.878736 | -1.034541 | O | 0.741613  | 1.396295  | 0.238088  |
| P | 0.048804  | -0.219446 | -0.089472 | P | -0.056434 | 0.0884    | -0.422977 |
| O | -0.022636 | 1.241235  | -0.382733 | O | -0.502026 | -0.789683 | 0.692779  |
| C | -3.445002 | 0.465414  | -1.611022 | C | -3.910479 | 0.242211  | -0.500329 |
| C | -3.045963 | 1.748119  | -1.20786  | C | -4.293906 | -0.564672 | 0.580442  |
| C | -4.689111 | -0.033907 | -1.207378 | C | -4.138138 | -0.193669 | -1.811718 |
| C | -3.900507 | 2.516019  | -0.413592 | C | -4.931704 | -1.783822 | 0.337116  |
| H | -2.056389 | 2.149464  | -1.50321  | H | -4.072103 | -0.248864 | 1.619772  |
| C | -5.532207 | 0.749503  | -0.415137 | C | -4.775853 | -1.415031 | -2.035792 |
| H | -5.007119 | -1.045443 | -1.509096 | H | -3.808022 | 0.427372  | -2.661483 |
| C | -5.146976 | 2.028073  | -0.015118 | C | -5.181317 | -2.215257 | -0.96617  |
| H | -5.817037 | 2.649308  | 0.603376  | H | -5.697149 | -3.172545 | -1.151674 |
| C | 3.348978  | -2.377845 | 0.087329  | C | 3.436104  | 1.914839  | -0.380714 |
| C | 3.767291  | -2.954787 | 1.2941    | C | 4.471498  | 1.454447  | -1.204819 |
| C | 3.975423  | -1.209999 | -0.373414 | C | 3.459423  | 1.614352  | 0.989551  |
| C | 4.806523  | -2.373574 | 2.023155  | C | 5.518239  | 0.709111  | -0.65841  |
| H | 3.269311  | -3.861473 | 1.676542  | H | 4.459257  | 1.675914  | -2.285208 |
| C | 5.013939  | -0.642531 | 0.366541  | C | 4.518365  | 0.877564  | 1.522258  |
| H | 3.637498  | -0.740311 | -1.315823 | H | 2.629603  | 1.949028  | 1.638449  |
| C | 5.438848  | -1.217227 | 1.566242  | C | 5.553895  | 0.418959  | 0.706068  |
| H | 6.261301  | -0.762444 | 2.144013  | H | 6.387426  | -0.164476 | 1.132612  |

|   |           |           |           |   |           |           |           |
|---|-----------|-----------|-----------|---|-----------|-----------|-----------|
| C | -0.388272 | 1.173679  | 4.205319  | C | 1.264391  | -3.672589 | -2.778952 |
| H | -0.797912 | 1.212798  | 5.219434  | H | 1.618278  | -4.707569 | -2.761063 |
| C | 0.626647  | 2.168998  | 3.896198  | C | 0.625887  | -3.26644  | -4.02545  |
| C | 1.225538  | 2.84341   | 4.978921  | C | 0.515552  | -4.25199  | -5.02639  |
| C | 1.002298  | 2.506786  | 2.581253  | C | 0.125563  | -1.973551 | -4.281738 |
| C | 2.202998  | 3.807344  | 4.756383  | C | -0.078941 | -3.962361 | -6.25056  |
| H | 0.925595  | 2.597189  | 5.995093  | H | 0.899127  | -5.251521 | -4.835004 |
| C | 1.970437  | 3.482561  | 2.363329  | C | -0.467939 | -1.69177  | -5.507348 |
| H | 0.520931  | 2.039478  | 1.729741  | H | 0.199979  | -1.19858  | -3.52829  |
| C | 2.575618  | 4.126754  | 3.447466  | C | -0.572815 | -2.6791   | -6.492825 |
| H | 2.666783  | 4.314419  | 5.597763  | H | -0.158971 | -4.733686 | -7.011114 |
| H | 2.235044  | 3.747904  | 1.342192  | H | -0.854325 | -0.694373 | -5.695853 |
| H | 3.330624  | 4.888534  | 3.270807  | H | -1.040799 | -2.447762 | -7.445873 |
| C | -1.91027  | -0.581503 | 3.787995  | C | 2.166773  | -3.497595 | -0.61257  |
| C | -2.979514 | -0.120595 | 4.565215  | C | 3.296862  | -4.304713 | -0.788233 |
| C | -1.920151 | -1.913209 | 3.334933  | C | 1.744002  | -3.178449 | 0.689749  |
| C | -4.025867 | -0.972123 | 4.91951   | C | 3.983155  | -4.819989 | 0.311276  |
| H | -3.024142 | 0.922765  | 4.864016  | H | 3.676028  | -4.500932 | -1.787339 |
| C | -2.951778 | -2.764994 | 3.692223  | C | 2.417523  | -3.697557 | 1.78374   |
| H | -1.108004 | -2.269534 | 2.711395  | H | 0.876925  | -2.541723 | 0.836796  |
| C | -4.012866 | -2.305735 | 4.49028   | C | 3.538463  | -4.525649 | 1.607186  |
| H | -4.848617 | -0.581833 | 5.507266  | H | 4.865584  | -5.427444 | 0.14629   |
| H | -2.965593 | -3.797005 | 3.356936  | H | 2.092546  | -3.470236 | 2.794126  |
| P | 2.046711  | 3.964947  | -1.616246 | P | -1.346086 | -0.433361 | 4.258237  |
| O | 1.622127  | 2.513041  | -2.213913 | O | -2.159329 | -0.321537 | 2.84778   |
| O | 0.818456  | 4.889567  | -2.278578 | O | -2.667883 | -0.524898 | 5.282259  |
| O | 3.261647  | 4.32347   | -2.703448 | O | -0.981648 | 1.18576   | 4.475871  |
| C | 0.49476   | 6.020105  | -1.491753 | C | -2.781117 | -1.791933 | 5.904088  |
| C | 0.807004  | 7.295401  | -2.246704 | C | -4.087668 | -2.448542 | 5.511011  |
| H | 1.039335  | 5.99524   | -0.510127 | H | -2.773795 | -1.605516 | 7.016778  |
| H | -0.615615 | 5.958255  | -1.294557 | H | -1.910253 | -2.449611 | 5.640104  |
| H | 0.404882  | 8.170032  | -1.682665 | H | -4.199945 | -3.412662 | 6.060942  |
| H | 1.906844  | 7.42559   | -2.380969 | H | -4.943889 | -1.779401 | 5.76634   |
| H | 0.33535   | 7.264166  | -3.25802  | H | -4.125854 | -2.649415 | 4.411973  |
| C | 4.501043  | 4.28625   | -2.014794 | C | 0.207699  | 1.269971  | 5.245105  |
| C | 5.586607  | 4.665279  | -2.994765 | C | 0.499343  | 2.73169   | 5.491955  |
| H | 4.662733  | 3.249217  | -1.609172 | H | 1.044055  | 0.778403  | 4.676474  |
| H | 4.4632    | 5.006354  | -1.152976 | H | 0.056871  | 0.720004  | 6.212938  |
| H | 6.576772  | 4.635796  | -2.481823 | H | 1.440343  | 2.828371  | 6.083268  |
| H | 5.595744  | 3.952725  | -3.853827 | H | 0.616761  | 3.27177   | 4.522461  |
| H | 5.408537  | 5.692069  | -3.393818 | H | -0.340322 | 3.203911  | 6.055415  |

|   |           |           |           |   |           |           |           |
|---|-----------|-----------|-----------|---|-----------|-----------|-----------|
| H | 1.02626   | 2.039136  | -1.585319 | H | -1.559251 | -0.503239 | 2.084795  |
| C | -6.882124 | 0.182809  | 0.005756  | C | -5.029688 | -1.896879 | -3.45791  |
| C | -3.469248 | 3.902741  | 0.050971  | C | -5.349591 | -2.660096 | 1.512425  |
| C | 5.264566  | -3.019695 | 3.325122  | C | 6.627923  | 0.191109  | -1.565334 |
| C | 5.689801  | 0.632181  | -0.125601 | C | 4.551692  | 0.588642  | 3.019108  |
| F | -6.80125  | -0.971465 | 0.747367  | F | -4.135505 | -2.842555 | -3.900523 |
| F | -7.701763 | -0.153442 | -1.044913 | F | -4.979319 | -0.91527  | -4.417571 |
| F | -7.64921  | 1.022037  | 0.776262  | F | -6.256379 | -2.487322 | -3.645589 |
| F | -4.506575 | 4.790842  | 0.215014  | F | -6.347846 | -3.560833 | 1.22273   |
| F | -2.835651 | 3.910343  | 1.271235  | F | -4.341222 | -3.438441 | 2.025934  |
| F | -2.601413 | 4.551951  | -0.789131 | F | -5.830181 | -1.967234 | 2.595656  |
| F | 5.805078  | -2.146545 | 4.237134  | F | 6.391815  | -1.059225 | -2.084884 |
| F | 6.234916  | -3.979638 | 3.162642  | F | 7.853669  | 0.073862  | -0.956363 |
| F | 4.271008  | -3.664238 | 4.021336  | F | 6.872367  | 0.971572  | -2.669207 |
| F | 7.02287   | 0.725707  | 0.19578   | F | 5.292252  | -0.513299 | 3.371588  |
| F | 5.144315  | 1.787401  | 0.382622  | F | 3.32011   | 0.365232  | 3.583905  |
| F | 5.655306  | 0.814429  | -1.485089 | F | 5.0874    | 1.606663  | 3.771421  |
| O | -4.977388 | -3.221107 | 4.774025  | O | 4.127413  | -4.975492 | 2.747516  |
| C | -6.100297 | -2.807518 | 5.540008  | C | 5.270316  | -5.810705 | 2.635971  |
| H | -6.737422 | -3.688404 | 5.633141  | H | 6.098915  | -5.294351 | 2.133816  |
| H | -5.802058 | -2.46775  | 6.540419  | H | 5.563348  | -6.052465 | 3.65893   |
| H | -6.657511 | -2.00763  | 5.035423  | H | 5.039934  | -6.737841 | 2.094967  |

(R)-int3

|   |           |           |          |
|---|-----------|-----------|----------|
| C | -0.626405 | -5.260015 | 5.311685 |
| C | -1.604139 | -4.914909 | 4.413147 |
| C | -1.508988 | -3.707013 | 3.666876 |
| C | -0.40519  | -2.840584 | 3.873402 |
| C | 0.598187  | -3.234586 | 4.80449  |
| C | 0.490788  | -4.41185  | 5.502178 |
| H | -3.368663 | -4.034388 | 2.594174 |
| H | -0.695525 | -6.194046 | 5.888281 |
| H | -2.476244 | -5.565901 | 4.249697 |
| C | -2.500042 | -3.366671 | 2.712368 |
| C | -0.31664  | -1.625564 | 3.12832  |
| H | 1.468132  | -2.574326 | 4.951047 |
| H | 1.272895  | -4.710268 | 6.216292 |
| C | -1.256146 | -1.371509 | 2.123018 |
| C | -2.391367 | -2.22749  | 1.944132 |
| C | 0.791178  | -0.684201 | 3.334644 |
| C | 1.038441  | -0.09116  | 4.60988  |
| C | 1.561399  | -0.286602 | 2.236377 |
| C | 0.197383  | -0.329116 | 5.734256 |

(S)-int3

|   |           |          |           |
|---|-----------|----------|-----------|
| C | -2.782076 | 6.685507 | 2.043361  |
| C | -3.493584 | 5.672738 | 1.451065  |
| C | -2.822732 | 4.570558 | 0.851116  |
| C | -1.404872 | 4.532636 | 0.845599  |
| C | -0.696717 | 5.594502 | 1.477733  |
| C | -1.367371 | 6.640160 | 2.061918  |
| H | -4.656012 | 3.577374 | 0.241876  |
| H | -3.297668 | 7.537709 | 2.509950  |
| H | -4.593749 | 5.691725 | 1.431885  |
| C | -3.556562 | 3.50771  | 0.266320  |
| C | -0.733704 | 3.427469 | 0.239658  |
| H | 0.404661  | 5.557065 | 1.490318  |
| H | -0.812678 | 7.454420 | 2.551903  |
| C | -1.487654 | 2.345127 | -0.226409 |
| C | -2.918999 | 2.407959 | -0.265800 |
| C | 0.731468  | 3.364004 | 0.171055  |
| C | 1.490854  | 4.367263 | -0.505597 |
| C | 1.389663  | 2.241811 | 0.682327  |
| C | 0.876641  | 5.469354 | -1.165498 |

|   |           |           |           |   |           |           |           |
|---|-----------|-----------|-----------|---|-----------|-----------|-----------|
| C | 2.135811  | 0.794063  | 4.764899  | C | 2.903687  | 4.251598  | -0.561183 |
| C | 2.691607  | 0.575148  | 2.404912  | C | 2.817424  | 2.143783  | 0.653191  |
| C | 0.452993  | 0.265243  | 6.945006  | C | 1.631881  | 6.411289  | -1.819229 |
| H | -0.672232 | -0.993925 | 5.609943  | H | -0.221996 | 5.547647  | -1.150518 |
| C | 2.386458  | 1.387371  | 6.033538  | C | 3.664217  | 5.246728  | -1.236165 |
| C | 2.96232   | 1.093003  | 3.651347  | C | 3.545321  | 3.135571  | 0.035451  |
| C | 1.564083  | 1.128063  | 7.100961  | C | 3.042631  | 6.304874  | -1.850331 |
| H | -0.20726  | 0.082881  | 7.806095  | H | 1.147882  | 7.255702  | -2.332358 |
| H | 3.246869  | 2.066066  | 6.135069  | H | 4.759463  | 5.141027  | -1.264282 |
| H | 3.823934  | 1.763647  | 3.799305  | H | 4.643989  | 3.066753  | -0.015283 |
| H | 1.750952  | 1.590693  | 8.08111   | H | 3.627563  | 7.071992  | -2.37854  |
| O | 1.330937  | -0.809647 | 0.978517  | O | 0.694827  | 1.235900  | 1.326662  |
| O | -1.199265 | -0.230932 | 1.34944   | O | -0.892565 | 1.229255  | -0.776714 |
| P | -0.000521 | -0.159981 | 0.162781  | P | -0.129862 | 0.156201  | 0.300186  |
| O | 0.169739  | 1.300824  | -0.140989 | O | 0.765733  | -0.715349 | -0.546374 |
| O | -0.260652 | -1.128825 | -0.963785 | O | -1.136987 | -0.524340 | 1.230351  |
| H | 0.23871   | -1.084507 | -2.507408 | H | -1.237342 | -1.934793 | 1.706227  |
| N | 0.540403  | -1.346732 | -3.491408 | N | -1.432617 | -2.946443 | 2.077601  |
| C | 3.570736  | 0.893274  | 1.274353  | C | 3.494379  | 0.998514  | 1.264468  |
| C | 3.224367  | 1.884712  | 0.344833  | C | 4.330378  | 0.177707  | 0.493175  |
| C | 4.779678  | 0.200304  | 1.134192  | C | 3.309042  | 0.721094  | 2.624624  |
| C | 4.09639   | 2.174474  | -0.707765 | C | 5.003062  | -0.885166 | 1.101137  |
| H | 2.260376  | 2.425207  | 0.432795  | H | 4.428908  | 0.352630  | -0.596957 |
| C | 5.639512  | 0.504506  | 0.076613  | C | 3.981968  | -0.351648 | 3.213231  |
| H | 5.053817  | -0.585506 | 1.857679  | H | 2.620615  | 1.343736  | 3.220969  |
| C | 5.307535  | 1.494406  | -0.848024 | C | 4.839224  | -1.155400 | 2.460633  |
| H | 5.996684  | 1.741933  | -1.672724 | H | 5.382226  | -1.990102 | 2.934869  |
| C | -3.433618 | -1.902427 | 0.970537  | C | -3.699106 | 1.331852  | -0.876692 |
| C | -3.942754 | -2.902928 | 0.131903  | C | -4.850006 | 0.849050  | -0.240245 |
| C | -3.944346 | -0.598396 | 0.877185  | C | -3.313223 | 0.784590  | -2.110378 |
| C | -4.955393 | -2.601662 | -0.781272 | C | -5.603987 | -0.165257 | -0.834667 |
| H | -3.535806 | -3.926593 | 0.18205   | H | -5.154639 | 1.258111  | 0.737382  |
| C | -4.957336 | -0.314347 | -0.040047 | C | -4.079742 | -0.225329 | -2.693276 |
| H | -3.532017 | 0.199604  | 1.523023  | H | -2.390497 | 1.142699  | -2.603602 |
| C | -5.472488 | -1.309563 | -0.873085 | C | -5.22909  | -0.707748 | -2.063818 |
| H | -6.274723 | -1.077037 | -1.593288 | H | -5.82431  | -1.512973 | -2.526356 |
| C | 0.140763  | -0.647837 | -4.517487 | C | -1.842777 | -3.143294 | 3.302501  |
| H | 0.365127  | -1.067709 | -5.496376 | H | -2.014079 | -4.180896 | 3.599897  |
| C | -0.568463 | 0.604715  | -4.495424 | C | -2.079658 | -2.141231 | 4.337747  |
| C | -1.070485 | 1.067322  | -5.733629 | C | -2.478455 | -2.623166 | 5.590357  |
| C | -0.759711 | 1.382202  | -3.330933 | C | -1.919187 | -0.722202 | 4.157742  |
| C | -1.767818 | 2.265365  | -5.804921 | C | -2.715914 | -1.750081 | 6.649615  |
| H | -0.913324 | 0.473965  | -6.631477 | H | -2.606608 | -3.706075 | 5.750989  |
| C | -1.45093  | 2.585375  | -3.414816 | C | -2.160109 | 0.124242  | 5.229628  |
| H | -0.358466 | 1.077454  | -2.370077 | H | -1.615314 | -0.327602 | 3.188531  |

|   |           |           |           |   |           |           |           |
|---|-----------|-----------|-----------|---|-----------|-----------|-----------|
| C | -1.957156 | 3.023106  | -4.644218 | C | -2.555758 | -0.377942 | 6.471786  |
| H | -2.156825 | 2.612642  | -6.757598 | H | -3.027403 | -2.149277 | 7.626567  |
| H | -1.581857 | 3.188723  | -2.519066 | H | -2.033632 | 1.211027  | 5.096241  |
| H | -2.494991 | 3.966146  | -4.698617 | H | -2.739436 | 0.312246  | 7.309938  |
| C | 1.309206  | -2.539612 | -3.555245 | C | -1.231484 | -3.976369 | 1.118915  |
| C | 2.133441  | -2.839089 | -4.64408  | C | -1.727756 | -5.276077 | 1.287936  |
| C | 1.236281  | -3.423486 | -2.464372 | C | -0.493939 | -3.653224 | -0.069649 |
| C | 2.853857  | -4.030653 | -4.672214 | C | -1.505411 | -6.254373 | 0.321805  |
| H | 2.255596  | -2.134912 | -5.461656 | H | -2.319743 | -5.557345 | 2.173268  |
| C | 1.952796  | -4.607058 | -2.492853 | C | -0.275417 | -4.630541 | -1.019414 |
| H | 0.620734  | -3.159456 | -1.611129 | H | -0.089832 | -2.649621 | -0.219672 |
| C | 2.761625  | -4.927704 | -3.596793 | C | -0.778849 | -5.936026 | -0.829762 |
| H | 3.49759   | -4.237137 | -5.518939 | H | -1.908433 | -7.265115 | 0.477735  |
| H | 1.90842   | -5.304718 | -1.663163 | H | 0.294821  | -4.401256 | -1.934422 |
| P | -1.460625 | 4.463465  | 0.036562  | P | 2.565622  | -0.79128  | -3.707086 |
| O | -1.192281 | 3.29327   | 1.123507  | O | 2.882196  | -0.283365 | -2.177287 |
| O | -0.160408 | 5.45679   | 0.392815  | O | 4.146774  | -0.660426 | -4.292773 |
| O | -2.65199  | 5.313294  | 0.845443  | O | 1.956644  | 0.656288  | -4.337202 |
| C | 0.214143  | 6.284368  | -0.691385 | C | 4.673045  | -1.902067 | -4.712430 |
| C | 0.022167  | 7.742554  | -0.329892 | C | 5.893369  | -2.254918 | -3.887793 |
| H | -0.369385 | 6.024722  | -1.615035 | H | 4.973012  | -1.778562 | -5.793135 |
| H | 1.308135  | 6.080522  | -0.883356 | H | 3.899406  | -2.713136 | -4.642249 |
| H | 0.441005  | 8.386237  | -1.139138 | H | 6.337391  | -3.205657 | -4.266324 |
| H | -1.058957 | 7.983653  | -0.195981 | H | 6.653365  | -1.440687 | -3.96214  |
| H | 0.548922  | 7.969609  | 0.627748  | H | 5.630397  | -2.379021 | -2.808493 |
| C | -3.891675 | 5.056872  | 0.207006  | C | 1.003370  | 0.338607  | -5.33401  |
| C | -4.952893 | 5.871028  | 0.909539  | C | 0.529359  | 1.631930  | -5.955784 |
| H | -4.115822 | 3.955975  | 0.26945   | H | 0.150360  | -0.219249 | -4.858591 |
| H | -3.811829 | 5.344375  | -0.876651 | H | 1.481721  | -0.325710 | -6.103778 |
| H | -5.943553 | 5.680924  | 0.433292  | H | -0.238078 | 1.411164  | -6.734644 |
| H | -5.002924 | 5.588407  | 1.988192  | H | 0.082915  | 2.293952  | -5.176113 |
| H | -4.714973 | 6.959248  | 0.843711  | H | 1.385681  | 2.172607  | -6.424557 |
| H | -0.709831 | 2.532041  | 0.705654  | H | 2.101224  | -0.417008 | -1.581495 |
| C | 6.944206  | -0.264213 | -0.084314 | C | 3.760557  | -0.663700 | 4.686372  |
| C | 3.719469  | 3.230471  | -1.739394 | C | 5.913173  | -1.777845 | 0.266114  |
| C | -5.509723 | -3.699311 | -1.680105 | C | -6.857019 | -0.676700 | -0.135586 |
| C | -5.499461 | 1.105395  | -0.152894 | C | -3.667892 | -0.803314 | -4.042614 |
| F | 6.848261  | -1.370177 | -0.8959   | F | 2.725764  | -1.538016 | 4.926768  |
| F | 7.469835  | -0.753916 | 1.086316  | F | 3.459798  | 0.426234  | 5.466539  |
| F | 7.971087  | 0.462937  | -0.636604 | F | 4.834156  | -1.242979 | 5.318671  |
| F | 4.792144  | 3.862514  | -2.324158 | F | 6.904693  | -2.406236 | 0.983726  |
| F | 3.011636  | 2.736828  | -2.811157 | F | 5.26721   | -2.808736 | -0.372204 |
| F | 2.944731  | 4.257601  | -1.265108 | F | 6.58933   | -1.12796  | -0.735995 |
| F | -5.981511 | -3.260174 | -2.893692 | F | -7.182004 | -1.980087 | -0.424163 |
| F | -6.568108 | -4.38956  | -1.139469 | F | -7.997744 | 0.027975  | -0.437068 |



|   |           |           |           |   |           |           |           |
|---|-----------|-----------|-----------|---|-----------|-----------|-----------|
| F | -4.605106 | -4.680363 | -2.008069 | F | -6.797829 | -0.642963 | 1.237075  |
| F | -6.812303 | 1.1823    | -0.553301 | F | -4.031377 | -2.115263 | -4.232372 |
| F | -4.831114 | 1.889926  | -1.063684 | F | -2.316701 | -0.789489 | -4.285006 |
| F | -5.457464 | 1.832496  | 1.009814  | F | -4.211408 | -0.147544 | -5.121364 |
| O | 3.421058  | -6.109508 | -3.521917 | O | -0.495556 | -6.818077 | -1.844800 |
| C | 4.277624  | -6.4846   | -4.594188 | C | -0.993727 | -8.144739 | -1.693456 |
| H | 4.690308  | -7.455564 | -4.317163 | H | -0.643244 | -8.657351 | -2.625469 |
| H | 3.722137  | -6.58009  | -5.535782 | H | -0.554878 | -8.627944 | -0.787213 |
| H | 5.095684  | -5.764681 | -4.722898 | H | -2.109256 | -8.14166  | -1.639169 |

(*R*)-int3-mcp

|   |           |           |           |
|---|-----------|-----------|-----------|
| C | 1.728777  | -3.717632 | 1.073032  |
| P | -1.898971 | -3.150166 | -0.906445 |
| C | 1.727658  | 5.698809  | -4.103547 |
| C | 2.600077  | 4.939015  | -3.366011 |
| C | 2.146279  | 4.215818  | -2.227217 |
| C | 0.784641  | 4.299598  | -1.84075  |
| C | -0.096429 | 5.091689  | -2.631738 |
| C | 0.362326  | 5.769284  | -3.73361  |
| H | 4.105246  | 3.420698  | -1.747496 |
| H | 2.073213  | 6.255254  | -4.987127 |
| H | 3.662786  | 4.869777  | -3.643298 |
| C | 3.03804   | 3.414965  | -1.472824 |
| C | 0.333674  | 3.571953  | -0.69977  |
| H | -1.158825 | 5.14251   | -2.343542 |
| H | -0.326291 | 6.372378  | -4.3443   |
| C | 1.205476  | 2.67409   | -0.071564 |
| C | 2.596974  | 2.653869  | -0.411799 |
| C | -1.049825 | 3.700113  | -0.225021 |
| C | -1.57795  | 4.961868  | 0.177258  |
| C | -1.832856 | 2.550288  | -0.078668 |
| C | -0.788977 | 6.147217  | 0.192922  |
| C | -2.927651 | 5.045038  | 0.60795   |
| C | -3.202354 | 2.641271  | 0.316922  |
| C | -1.323525 | 7.345765  | 0.595165  |
| H | 0.265325  | 6.081925  | -0.119892 |
| C | -3.461103 | 6.302029  | 1.008864  |
| C | -3.725885 | 3.873941  | 0.644985  |
| C | -2.677143 | 7.428195  | 1.001984  |
| H | -0.704755 | 8.255458  | 0.609456  |
| H | -4.512775 | 6.347809  | 1.330089  |
| H | -4.780173 | 3.963922  | 0.952803  |
| H | -3.085246 | 8.400321  | 1.315028  |
| O | -1.339207 | 1.316945  | -0.43441  |
| O | 0.80855   | 1.885039  | 0.985439  |

(*S*)-int3-mcp

|   |           |          |           |
|---|-----------|----------|-----------|
| C | 1.092554  | 6.502283 | -3.494082 |
| C | 2.060246  | 5.657026 | -3.012942 |
| C | 1.764731  | 4.738196 | -1.967328 |
| C | 0.464067  | 4.713374 | -1.402399 |
| C | -0.519824 | 5.597124 | -1.931664 |
| C | -0.213996 | 6.464883 | -2.950332 |
| H | 3.7733    | 3.916621 | -1.900212 |
| H | 1.316246  | 7.211482 | -4.304451 |
| H | 3.079268  | 5.670573 | -3.428062 |
| C | 2.754474  | 3.845269 | -1.486366 |
| C | 0.170754  | 3.79119  | -0.352377 |
| H | -1.537179 | 5.564608 | -1.5093   |
| H | -0.982005 | 7.139446 | -3.357728 |
| C | 1.130995  | 2.839163 | 0.009001  |
| C | 2.462859  | 2.909798 | -0.516575 |
| C | -1.147903 | 3.769011 | 0.292813  |
| C | -1.671037 | 4.918659 | 0.957948  |
| C | -1.863406 | 2.567156 | 0.336979  |
| C | -0.932946 | 6.130944 | 1.076773  |
| C | -2.957517 | 4.852777 | 1.551626  |
| C | -3.172814 | 2.51244  | 0.912306  |
| C | -1.460216 | 7.217475 | 1.729216  |
| H | 0.076649  | 6.177694 | 0.6385    |
| C | -3.486591 | 5.997144 | 2.211121  |
| C | -3.697067 | 3.643542 | 1.496701  |
| C | -2.755073 | 7.154817 | 2.297454  |
| H | -0.880577 | 8.148138 | 1.821308  |
| H | -4.491185 | 5.929278 | 2.655516  |
| H | -4.703662 | 3.620967 | 1.944349  |
| H | -3.159507 | 8.039729 | 2.81023   |
| O | -1.376466 | 1.435136 | -0.283455 |
| O | 0.886124  | 1.882059 | 0.969738  |
| P | -0.165469 | 0.614026 | 0.562801  |
| O | -0.618121 | 0.01077  | 1.842792  |

|   |           |           |           |   |           |           |           |
|---|-----------|-----------|-----------|---|-----------|-----------|-----------|
| P | -0.276119 | 0.614487  | 0.68249   | O | 0.436696  | -0.268121 | -0.530665 |
| O | -0.90663  | 0.295217  | 1.990413  | H | 1.390356  | -1.654196 | -0.383419 |
| O | 0.356046  | -0.492479 | -0.149082 | N | 1.876655  | -2.588198 | -0.360848 |
| H | 1.232054  | -1.910766 | 0.228642  | C | -3.965834 | 1.278434  | 0.878145  |
| N | 1.826407  | -2.776252 | 0.179839  | C | -3.752983 | 0.261028  | 1.819553  |
| C | -4.071842 | 1.45894   | 0.354296  | C | -4.961843 | 1.129465  | -0.095128 |
| C | -3.99768  | 0.54098   | 1.412503  | C | -4.552699 | -0.883499 | 1.787141  |
| C | -5.011378 | 1.26769   | -0.669008 | H | -2.944012 | 0.348887  | 2.571416  |
| C | -4.866014 | -0.550912 | 1.435995  | C | -5.750715 | -0.022682 | -0.113406 |
| H | -3.247854 | 0.670564  | 2.218914  | H | -5.116863 | 1.914615  | -0.853701 |
| C | -5.879848 | 0.174361  | -0.622637 | C | -5.554433 | -1.034264 | 0.826416  |
| H | -5.066781 | 1.979007  | -1.510021 | H | -6.177774 | -1.943811 | 0.806693  |
| C | -5.813683 | -0.740874 | 0.427819  | C | 3.521911  | 2.035569  | -0.012853 |
| H | -6.501199 | -1.601826 | 0.466352  | C | 4.417604  | 1.429592  | -0.903642 |
| C | 3.564568  | 1.89398   | 0.377189  | C | 3.676749  | 1.82837   | 1.367465  |
| C | 4.644821  | 1.260466  | -0.252641 | C | 5.459258  | 0.636862  | -0.416953 |
| C | 3.459438  | 1.841334  | 1.776064  | H | 4.302207  | 1.579206  | -1.990119 |
| C | 5.615628  | 0.607781  | 0.510827  | C | 4.730948  | 1.045091  | 1.838228  |
| H | 4.729619  | 1.274404  | -1.352118 | H | 2.955216  | 2.282424  | 2.072319  |
| C | 4.427107  | 1.169933  | 2.523404  | C | 5.63083   | 0.446263  | 0.954064  |
| H | 2.605782  | 2.331354  | 2.281409  | H | 6.470173  | -0.159059 | 1.335116  |
| C | 5.515282  | 0.556056  | 1.901849  | C | 2.261307  | -3.149322 | -1.472998 |
| H | 6.286909  | 0.0431    | 2.500147  | H | 2.629355  | -4.167892 | -1.38337  |
| H | 2.328129  | -4.60586  | 0.880878  | C | 2.267569  | -2.580139 | -2.800129 |
| C | 0.922367  | -3.720802 | 2.267549  | C | 2.716207  | -3.42449  | -3.839174 |
| C | 1.007684  | -4.864322 | 3.092693  | C | 1.866604  | -1.261062 | -3.105157 |
| C | 0.061142  | -2.663162 | 2.627666  | C | 2.767785  | -2.966696 | -5.150491 |
| C | 0.250395  | -4.945728 | 4.254923  | H | 3.022439  | -4.441681 | -3.607087 |
| H | 1.66773   | -5.681651 | 2.812631  | C | 1.921078  | -0.815094 | -4.419767 |
| C | -0.695867 | -2.756041 | 3.78641   | H | 1.500936  | -0.602344 | -2.324915 |
| H | -0.037472 | -1.770898 | 2.024802  | C | 2.370714  | -1.658935 | -5.441552 |
| C | -0.60284  | -3.89158  | 4.599937  | H | 3.11623   | -3.623625 | -5.941958 |
| H | 0.318936  | -5.825079 | 4.887991  | H | 1.603639  | 0.19691   | -4.651732 |
| H | -1.363364 | -1.937875 | 4.038188  | H | 2.409488  | -1.296744 | -6.465251 |
| H | -1.200033 | -3.956465 | 5.505526  | C | 1.978026  | -3.175985 | 0.931165  |
| C | 2.675081  | -2.844495 | -0.972902 | C | 2.94068   | -4.148435 | 1.220828  |
| C | 3.907648  | -3.490819 | -0.922848 | C | 1.092348  | -2.7387   | 1.93067   |
| C | 2.23867   | -2.2409   | -2.162984 | C | 3.000833  | -4.720347 | 2.488522  |
| C | 4.706875  | -3.571484 | -2.065834 | H | 3.676873  | -4.44278  | 0.478675  |
| H | 4.277598  | -3.90387  | 0.0109    | C | 1.155949  | -3.307278 | 3.191236  |
| C | 3.03107   | -2.319514 | -3.29551  | H | 0.360563  | -1.960022 | 1.734804  |
| H | 1.276196  | -1.742286 | -2.197432 | C | 2.099026  | -4.306782 | 3.482136  |
| C | 4.269075  | -2.987794 | -3.260687 | H | 3.762298  | -5.462396 | 2.69705   |
| H | 5.670677  | -4.063032 | -2.001288 | H | 0.477823  | -2.984073 | 3.973713  |
| H | 2.712191  | -1.870505 | -4.230097 | P | -1.603117 | -3.171424 | -1.254372 |

|                     |           |           |           |                     |           |           |           |
|---------------------|-----------|-----------|-----------|---------------------|-----------|-----------|-----------|
| O                   | -1.370282 | -1.86887  | -1.794076 | O                   | -1.361662 | -1.756748 | -2.039781 |
| O                   | -0.826114 | -4.366882 | -1.32764  | O                   | -0.685363 | -4.252023 | -2.162131 |
| O                   | -3.216264 | -3.451264 | -1.89037  | O                   | -3.146761 | -3.411973 | -1.860566 |
| C                   | -0.6219   | -4.53896  | -2.71935  | C                   | -0.903073 | -4.216227 | -3.564881 |
| C                   | -1.08061  | -5.916417 | -3.136876 | C                   | -1.537073 | -5.509411 | -4.030735 |
| H                   | 0.485476  | -4.425392 | -2.9016   | H                   | 0.113062  | -4.092722 | -4.038945 |
| H                   | -1.170431 | -3.741518 | -3.288996 | H                   | -1.545849 | -3.334456 | -3.830859 |
| H                   | -0.830671 | -6.08268  | -4.211206 | H                   | -1.582824 | -5.521462 | -5.145427 |
| H                   | -0.577756 | -6.698203 | -2.519775 | H                   | -0.940575 | -6.384804 | -3.680254 |
| H                   | -2.184423 | -6.017298 | -3.001933 | H                   | -2.573934 | -5.604956 | -3.625815 |
| C                   | -4.123137 | -4.27906  | -1.175352 | C                   | -3.776469 | -4.411393 | -1.069117 |
| C                   | -5.32825  | -4.507057 | -2.0567   | C                   | -5.185116 | -4.588625 | -1.58429  |
| H                   | -4.407468 | -3.765675 | -0.216472 | H                   | -3.771675 | -4.081441 | 0.005779  |
| H                   | -3.605673 | -5.244924 | -0.929702 | H                   | -3.183771 | -5.361592 | -1.161011 |
| H                   | -6.076143 | -5.128089 | -1.509636 | H                   | -5.707527 | -5.364294 | -0.976074 |
| H                   | -5.792978 | -3.530218 | -2.337366 | H                   | -5.748687 | -3.625719 | -1.517184 |
| H                   | -5.028722 | -5.033395 | -2.994199 | H                   | -5.16846  | -4.908985 | -2.653383 |
| H                   | -0.834896 | -1.267063 | -1.220072 | H                   | -0.813726 | -1.143151 | -1.490111 |
| C                   | -6.901378 | -0.032771 | -1.732775 | C                   | -6.845761 | -0.179639 | -1.160466 |
| C                   | -4.806487 | -1.581491 | 2.555726  | C                   | -4.330436 | -2.004848 | 2.794516  |
| C                   | 6.818143  | -0.037388 | -0.168086 | C                   | 6.414759  | -0.043895 | -1.38806  |
| C                   | 4.296085  | 1.09371   | 4.040081  | C                   | 4.909591  | 0.824153  | 3.336557  |
| F                   | -6.462558 | -0.825131 | -2.765922 | F                   | -7.066834 | -1.474577 | -1.563675 |
| F                   | -7.316989 | 1.123633  | -2.346408 | F                   | -6.62952  | 0.508587  | -2.328514 |
| F                   | -8.068962 | -0.633705 | -1.32538  | F                   | -8.083476 | 0.25324   | -0.744439 |
| F                   | -5.995518 | -1.746525 | 3.2291    | F                   | -5.489613 | -2.598205 | 3.239384  |
| F                   | -4.495014 | -2.852284 | 2.124189  | F                   | -3.593199 | -3.058806 | 2.30766   |
| F                   | -3.894108 | -1.334543 | 3.547928  | F                   | -3.682766 | -1.636018 | 3.945444  |
| F                   | 7.113743  | -1.303247 | 0.284936  | F                   | 6.085467  | -1.350117 | -1.670138 |
| F                   | 7.995197  | 0.653873  | -0.00784  | F                   | 7.715397  | -0.117416 | -0.953707 |
| F                   | 6.70436   | -0.189847 | -1.528466 | F                   | 6.502261  | 0.550094  | -2.623075 |
| F                   | 5.495724  | 1.06978   | 4.711012  | F                   | 6.221642  | 0.757375  | 3.742243  |
| F                   | 3.645608  | -0.031833 | 4.486362  | F                   | 4.360532  | -0.347852 | 3.798364  |
| F                   | 3.609274  | 2.135298  | 4.610614  | F                   | 4.359107  | 1.797561  | 4.131035  |
| O                   | 4.96258   | -3.00142  | -4.423528 | O                   | 2.072735  | -4.794616 | 4.746769  |
| C                   | 6.233483  | -3.636092 | -4.447918 | C                   | 3.011623  | -5.796804 | 5.114056  |
| H                   | 6.153082  | -4.702872 | -4.204122 | H                   | 4.042838  | -5.431484 | 5.026237  |
| H                   | 6.60049   | -3.525373 | -5.468527 | H                   | 2.799714  | -6.03269  | 6.157877  |
| H                   | 6.93454   | -3.154743 | -3.754514 | H                   | 2.891327  | -6.701759 | 4.504805  |
| <i>(R)</i> -TS4-mcp |           |           |           | <i>(S)</i> -TS4-mcp |           |           |           |
| C                   | 1.623192  | -3.634992 | 0.380754  | C                   | -0.264367 | -3.730707 | 1.507548  |
| P                   | -0.354022 | -3.871817 | -1.030322 | P                   | 1.483317  | -2.509627 | 2.56263   |
| C                   | 1.595459  | 5.728492  | -4.0249   | C                   | -3.916157 | 5.134413  | 3.535431  |
| C                   | 2.443544  | 5.033687  | -3.199812 | C                   | -4.446282 | 4.072687  | 2.846693  |

|   |           |           |           |   |           |           |           |
|---|-----------|-----------|-----------|---|-----------|-----------|-----------|
| C | 1.936064  | 4.303908  | -2.088745 | C | -3.714605 | 3.453633  | 1.795014  |
| C | 0.543506  | 4.313217  | -1.821591 | C | -2.436331 | 3.95523   | 1.44101   |
| C | -0.310145 | 5.039275  | -2.700613 | C | -1.911245 | 5.052967  | 2.181375  |
| C | 0.202242  | 5.72472   | -3.773976 | C | -2.630397 | 5.623815  | 3.201846  |
| H | 3.890798  | 3.637537  | -1.424737 | H | -5.270597 | 2.010456  | 1.340754  |
| H | 1.983596  | 6.290147  | -4.887235 | H | -4.477219 | 5.613031  | 4.351409  |
| H | 3.528413  | 5.023798  | -3.383977 | H | -5.442687 | 3.678245  | 3.09668   |
| C | 2.805778  | 3.570906  | -1.243311 | C | -4.248232 | 2.34167   | 1.096868  |
| C | 0.037465  | 3.576514  | -0.708102 | C | -1.704756 | 3.33264   | 0.384467  |
| H | -1.394324 | 5.033121  | -2.503576 | H | -0.909331 | 5.430736  | 1.920944  |
| H | -0.464694 | 6.276869  | -4.453036 | H | -2.214439 | 6.466895  | 3.773633  |
| C | 0.902293  | 2.740168  | 0.007033  | C | -2.195    | 2.148122  | -0.178268 |
| C | 2.319286  | 2.800561  | -0.207735 | C | -3.519189 | 1.688722  | 0.12551   |
| C | -1.384139 | 3.630382  | -0.345208 | C | -0.417222 | 3.871709  | -0.070811 |
| C | -2.012307 | 4.867975  | -0.009599 | C | -0.30372  | 5.206215  | -0.566207 |
| C | -2.108664 | 2.438863  | -0.22831  | C | 0.697719  | 3.027891  | -0.117427 |
| C | -1.297775 | 6.099594  | 0.028919  | C | -1.425556 | 6.077213  | -0.674386 |
| C | -3.389608 | 4.87944   | 0.328769  | C | 0.960963  | 5.683439  | -0.996657 |
| C | -3.503251 | 2.457973  | 0.092631  | C | 1.969674  | 3.511677  | -0.559989 |
| C | -1.928994 | 7.272528  | 0.360546  | C | -1.284073 | 7.356045  | -1.152724 |
| H | -0.221835 | 6.092569  | -0.207341 | H | -2.4159   | 5.701527  | -0.371615 |
| C | -4.023631 | 6.110324  | 0.656585  | C | 1.083852  | 7.017919  | -1.474846 |
| C | -4.117263 | 3.662531  | 0.354105  | C | 2.085742  | 4.819376  | -0.97335  |
| C | -3.309943 | 7.282062  | 0.670993  | C | -0.013759 | 7.837783  | -1.549663 |
| H | -1.367463 | 8.218198  | 0.392717  | H | -2.157624 | 8.019732  | -1.236942 |
| H | -5.095834 | 6.098787  | 0.904609  | H | 2.076722  | 7.373223  | -1.789909 |
| H | -5.190659 | 3.695805  | 0.600898  | H | 3.058459  | 5.211425  | -1.31112  |
| H | -3.795889 | 8.234682  | 0.927722  | H | 0.077143  | 8.868481  | -1.922423 |
| O | -1.53066  | 1.227052  | -0.541618 | O | 0.629324  | 1.740956  | 0.371391  |
| O | 0.455456  | 1.935     | 1.031894  | O | -1.495753 | 1.450276  | -1.139529 |
| P | -0.49246  | 0.589134  | 0.633662  | P | -0.109062 | 0.611066  | -0.652587 |
| O | -1.177029 | 0.168963  | 1.882861  | O | 0.662952  | 0.313676  | -1.885164 |
| O | 0.314593  | -0.426359 | -0.178046 | O | -0.455642 | -0.506345 | 0.334973  |
| H | 1.695908  | -1.616085 | 0.196883  | H | -0.604627 | -2.375015 | 0.034909  |
| N | 2.172516  | -2.491006 | -0.061319 | N | -0.285236 | -3.335047 | 0.215898  |
| C | -4.293586 | 1.222811  | 0.138362  | C | 3.138219  | 2.625516  | -0.602043 |
| C | -4.265286 | 0.392444  | 1.268077  | C | 3.38364   | 1.84505   | -1.741479 |
| C | -5.11257  | 0.891286  | -0.947896 | C | 4.020085  | 2.569954  | 0.48352   |
| C | -5.077624 | -0.743158 | 1.307228  | C | 4.535477  | 1.057465  | -1.803389 |
| H | -3.592398 | 0.619587  | 2.118234  | H | 2.657218  | 1.828836  | -2.576119 |
| C | -5.913763 | -0.251533 | -0.893643 | C | 5.153937  | 1.757411  | 0.414384  |
| H | -5.120527 | 1.526089  | -1.849467 | H | 3.814069  | 3.156784  | 1.394239  |
| C | -5.906135 | -1.073458 | 0.233056  | C | 5.426934  | 1.008125  | -0.730979 |
| H | -6.544466 | -1.971802 | 0.274447  | H | 6.335355  | 0.385641  | -0.784843 |
| C | 3.25567   | 2.113779  | 0.68202   | C | -4.124969 | 0.577973  | -0.609034 |

|   |           |           |           |   |           |           |           |
|---|-----------|-----------|-----------|---|-----------|-----------|-----------|
| C | 4.409721  | 1.510628  | 0.162013  | C | -4.904331 | -0.371091 | 0.065953  |
| C | 3.040316  | 2.099077  | 2.069651  | C | -3.973981 | 0.477101  | -2.001678 |
| C | 5.338539  | 0.919214  | 1.020045  | C | -5.536655 | -1.392923 | -0.64517  |
| H | 4.588003  | 1.504441  | -0.926455 | H | -5.020688 | -0.312784 | 1.161129  |
| C | 3.975861  | 1.499387  | 2.913715  | C | -4.612328 | -0.54954  | -2.698166 |
| H | 2.12604   | 2.560459  | 2.488221  | H | -3.343175 | 1.209758  | -2.539227 |
| C | 5.132645  | 0.910854  | 2.399996  | C | -5.400351 | -1.488902 | -2.030079 |
| H | 5.877732  | 0.455737  | 3.073635  | H | -5.914688 | -2.288176 | -2.589591 |
| H | 2.08046   | -4.534687 | -0.019899 | H | 0.199407  | -4.699562 | 1.661381  |
| C | 1.056728  | -3.765051 | 1.740879  | C | -1.381406 | -3.443212 | 2.439523  |
| C | 1.209125  | -4.999195 | 2.395047  | C | -1.647507 | -4.390846 | 3.440974  |
| C | 0.381766  | -2.717965 | 2.389079  | C | -2.169007 | -2.282648 | 2.361667  |
| C | 0.719199  | -5.175412 | 3.687863  | C | -2.695385 | -4.19859  | 4.337669  |
| H | 1.720677  | -5.817841 | 1.89359   | H | -1.032767 | -5.284948 | 3.513624  |
| C | -0.112275 | -2.903302 | 3.677379  | C | -3.211839 | -2.09496  | 3.265637  |
| H | 0.203163  | -1.767943 | 1.900544  | H | -1.953679 | -1.522679 | 1.617393  |
| C | 0.059176  | -4.126402 | 4.332059  | C | -3.481688 | -3.048727 | 4.25056   |
| H | 0.851768  | -6.130068 | 4.189318  | H | -2.897304 | -4.944809 | 5.100814  |
| H | -0.63962  | -2.08362  | 4.154723  | H | -3.81728  | -1.195446 | 3.20099   |
| H | -0.326781 | -4.264272 | 5.338548  | H | -4.300758 | -2.894787 | 4.947798  |
| C | 2.957066  | -2.41169  | -1.246729 | C | 0.614707  | -3.855754 | -0.755009 |
| C | 3.960107  | -3.345407 | -1.514661 | C | 0.906872  | -5.222275 | -0.810922 |
| C | 2.729194  | -1.359789 | -2.148534 | C | 1.195131  | -2.985127 | -1.694297 |
| C | 4.717948  | -3.256477 | -2.682858 | C | 1.788054  | -5.723657 | -1.770099 |
| H | 4.181204  | -4.132953 | -0.799607 | H | 0.42257   | -5.91738  | -0.13069  |
| C | 3.488583  | -1.263504 | -3.304491 | C | 2.065728  | -3.485436 | -2.65165  |
| H | 1.947554  | -0.637881 | -1.934258 | H | 0.971749  | -1.921053 | -1.683104 |
| C | 4.484418  | -2.212129 | -3.586548 | C | 2.375881  | -4.853737 | -2.697375 |
| H | 5.495915  | -3.988955 | -2.863289 | H | 1.989792  | -6.788247 | -1.793699 |
| H | 3.3215    | -0.460636 | -4.01527  | H | 2.532033  | -2.817487 | -3.370682 |
| O | -1.033155 | -2.433719 | -1.244238 | O | 1.396685  | -0.979668 | 2.110993  |
| O | 0.134017  | -4.415645 | -2.492694 | O | 1.236236  | -2.584295 | 4.171621  |
| O | -1.639507 | -4.873062 | -0.762505 | O | 3.096619  | -2.859795 | 2.503141  |
| C | -0.733829 | -4.189906 | -3.599797 | C | 1.849905  | -1.58119  | 4.977251  |
| C | -1.314202 | -5.497978 | -4.089679 | C | 2.943976  | -2.186661 | 5.828069  |
| H | -0.090646 | -3.727501 | -4.400927 | H | 1.028489  | -1.175223 | 5.632965  |
| H | -1.541872 | -3.468256 | -3.306057 | H | 2.246217  | -0.760108 | 4.322641  |
| H | -1.892089 | -5.315799 | -5.026922 | H | 3.326077  | -1.415048 | 6.538203  |
| H | -0.49813  | -6.22936  | -4.300729 | H | 2.548277  | -3.053295 | 6.40933   |
| H | -1.995474 | -5.942379 | -3.324562 | H | 3.790019  | -2.545267 | 5.19351   |
| C | -2.260223 | -4.543322 | 0.477205  | C | 3.584748  | -2.704089 | 1.173784  |
| C | -3.409368 | -5.497015 | 0.692982  | C | 5.077608  | -2.924015 | 1.197011  |
| H | -2.616483 | -3.478316 | 0.426799  | H | 3.3294    | -1.66949  | 0.816378  |
| H | -1.490178 | -4.633807 | 1.291659  | H | 3.063422  | -3.457494 | 0.521865  |
| H | -3.979083 | -5.174639 | 1.598342  | H | 5.461666  | -2.952041 | 0.149562  |

|   |           |           |           |   |           |           |           |
|---|-----------|-----------|-----------|---|-----------|-----------|-----------|
| H | -4.090379 | -5.489063 | -0.191463 | H | 5.582332  | -2.094172 | 1.750016  |
| H | -3.03567  | -6.537743 | 0.839528  | H | 5.322397  | -3.887131 | 1.70484   |
| H | -0.524746 | -1.64052  | -0.857741 | H | 0.651968  | -0.751589 | 1.444713  |
| C | -6.820044 | -0.594066 | -2.068839 | C | 6.117886  | 1.670988  | 1.590216  |
| C | -5.057849 | -1.650689 | 2.530654  | C | 4.821766  | 0.231241  | -3.051432 |
| C | 6.597257  | 0.268219  | 0.461032  | C | -6.379987 | -2.425551 | 0.091705  |
| C | 3.733583  | 1.474204  | 4.419028  | C | -4.444789 | -0.661843 | -4.210007 |
| F | -6.346686 | -0.192091 | -3.293916 | F | 6.420971  | 0.385117  | 1.972887  |
| F | -8.071791 | -0.029487 | -1.994499 | F | 5.683605  | 2.272402  | 2.745288  |
| F | -7.069598 | -1.935829 | -2.226965 | F | 7.345411  | 2.243835  | 1.355613  |
| F | -6.268107 | -2.239294 | 2.817093  | F | 6.160263  | 0.03882   | -3.305467 |
| F | -4.195805 | -2.717252 | 2.428777  | F | 4.310553  | -1.043815 | -3.018623 |
| F | -4.701674 | -1.036236 | 3.704169  | F | 4.334619  | 0.76504   | -4.21773  |
| F | 6.570639  | -1.106656 | 0.470688  | F | -5.72159  | -3.60228  | 0.359845  |
| F | 7.747025  | 0.581314  | 1.144891  | F | -7.510119 | -2.821802 | -0.58082  |
| F | 6.883826  | 0.587304  | -0.843649 | F | -6.844149 | -2.017316 | 1.319078  |
| F | 4.879934  | 1.507629  | 5.176954  | F | -5.549109 | -1.15515  | -4.863815 |
| F | 3.076918  | 0.350308  | 4.860075  | F | -3.426438 | -1.497336 | -4.599769 |
| F | 2.982484  | 2.518453  | 4.896553  | F | -4.178466 | 0.524393  | -4.846363 |
| O | 5.166322  | -2.025826 | -4.750469 | O | 3.245078  | -5.234998 | -3.674363 |
| C | 6.202738  | -2.93897  | -5.079802 | C | 3.577513  | -6.610021 | -3.78332  |
| H | 5.819213  | -3.962213 | -5.18661  | H | 2.691333  | -7.224138 | -3.991395 |
| H | 6.603475  | -2.602279 | -6.037308 | H | 4.271897  | -6.683659 | -4.621979 |
| H | 7.002695  | -2.928302 | -4.327787 | H | 4.068214  | -6.980587 | -2.873284 |

(R)-TS4

|   |           |           |           |
|---|-----------|-----------|-----------|
| C | 0.206199  | -3.735622 | 1.396088  |
| P | 1.120592  | -3.627412 | -0.861516 |
| C | -2.919922 | 6.541624  | 2.872822  |
| C | -3.660685 | 5.41436   | 2.62092   |
| C | -3.178945 | 4.415987  | 1.728934  |
| C | -1.930173 | 4.598411  | 1.082111  |
| C | -1.183859 | 5.776905  | 1.369043  |
| C | -1.664994 | 6.720309  | 2.242553  |
| H | -4.928597 | 3.147812  | 1.938761  |
| H | -3.287036 | 7.313354  | 3.565266  |
| H | -4.63589  | 5.25899   | 3.106611  |
| C | -3.932647 | 3.24249   | 1.476553  |
| C | -1.446417 | 3.589283  | 0.195992  |
| H | -0.206804 | 5.912357  | 0.87801   |
| H | -1.079211 | 7.624863  | 2.464895  |
| C | -2.144919 | 2.382617  | 0.083274  |
| C | -3.446481 | 2.239542  | 0.664455  |
| C | -0.190311 | 3.758272  | -0.543036 |
| C | -0.020292 | 4.841789  | -1.456693 |

(S)-TS4

|   |           |           |           |
|---|-----------|-----------|-----------|
| C | -0.185816 | -3.743843 | 0.633496  |
| P | 1.64998   | -3.510402 | -0.806538 |
| C | 1.675031  | 6.816657  | -3.347356 |
| C | 2.568534  | 5.829481  | -3.015779 |
| C | 2.227227  | 4.836795  | -2.055238 |
| C | 0.960441  | 4.882589  | -1.419851 |
| C | 0.052685  | 5.914366  | -1.793736 |
| C | 0.400367  | 6.853364  | -2.732851 |
| H | 4.133725  | 3.807584  | -2.198532 |
| H | 1.933586  | 7.582983  | -4.09275  |
| H | 3.560661  | 5.782793  | -3.489768 |
| C | 3.13611   | 3.799099  | -1.730089 |
| C | 0.622416  | 3.882786  | -0.458272 |
| H | -0.940586 | 5.939257  | -1.317695 |
| H | -0.309468 | 7.643079  | -3.021251 |
| C | 1.489555  | 2.803392  | -0.256086 |
| C | 2.794262  | 2.796268  | -0.847573 |
| C | -0.656148 | 3.919112  | 0.260969  |
| C | -1.012956 | 5.036007  | 1.075016  |

|   |           |           |           |   |           |           |           |
|---|-----------|-----------|-----------|---|-----------|-----------|-----------|
| C | 0.811735  | 2.787798  | -0.426823 | C | -1.491726 | 2.796577  | 0.224882  |
| C | -1.056682 | 5.78141   | -1.726064 | C | -0.141727 | 6.14644   | 1.269042  |
| C | 1.208855  | 4.980213  | -2.149644 | C | -2.264074 | 5.03867   | 1.742475  |
| C | 2.063499  | 2.954281  | -1.097733 | C | -2.758093 | 2.810511  | 0.889251  |
| C | -0.8649   | 6.807538  | -2.617234 | C | -0.512813 | 7.204793  | 2.06024   |
| H | -2.021997 | 5.664802  | -1.208215 | H | 0.842523  | 6.136739  | 0.773941  |
| C | 1.387077  | 6.059337  | -3.059885 | C | -2.631412 | 6.154319  | 2.545917  |
| C | 2.242106  | 4.034379  | -1.935333 | C | -3.126153 | 3.920741  | 1.618079  |
| C | 0.372943  | 6.954665  | -3.288253 | C | -1.775383 | 7.215147  | 2.700694  |
| H | -1.672925 | 7.525441  | -2.82332  | H | 0.168497  | 8.056053  | 2.208501  |
| H | 2.35263   | 6.154072  | -3.579454 | H | -3.612701 | 6.142365  | 3.043999  |
| H | 3.200367  | 4.174049  | -2.461477 | H | -4.100977 | 3.948187  | 2.13123   |
| H | 0.505125  | 7.787927  | -3.993833 | H | -2.053904 | 8.077687  | 3.323729  |
| O | 0.677004  | 1.719934  | 0.435669  | O | -1.175521 | 1.701268  | -0.554552 |
| O | -1.667192 | 1.343197  | -0.690288 | O | 1.173313  | 1.774264  | 0.610103  |
| P | -0.363953 | 0.477199  | -0.040724 | P | 0.009076  | 0.672826  | 0.065933  |
| O | 0.17772   | -0.2874   | -1.225744 | O | -0.458966 | -0.076943 | 1.278815  |
| O | -0.722766 | -0.236285 | 1.231839  | O | 0.475418  | -0.103541 | -1.148079 |
| H | -0.049018 | -1.758658 | 1.831789  | H | -0.970238 | -1.843077 | 0.729725  |
| N | 0.545522  | -2.589453 | 1.99525   | N | -1.123907 | -2.799659 | 0.380744  |
| C | 3.184285  | 2.026295  | -0.909622 | C | -3.682179 | 1.673135  | 0.824099  |
| C | 3.301996  | 0.871716  | -1.696592 | C | -3.529178 | 0.58337   | 1.692066  |
| C | 4.190287  | 2.347465  | 0.010057  | C | -4.762369 | 1.704668  | -0.066623 |
| C | 4.458357  | 0.094583  | -1.605987 | C | -4.481789 | -0.439098 | 1.691579  |
| H | 2.478592  | 0.568899  | -2.371162 | H | -2.649558 | 0.519005  | 2.360572  |
| C | 5.324637  | 1.538948  | 0.112423  | C | -5.696256 | 0.666098  | -0.064698 |
| H | 4.088928  | 3.236886  | 0.653796  | H | -4.874509 | 2.545185  | -0.771808 |
| C | 5.472716  | 0.41661   | -0.701539 | C | -5.5701   | -0.40626  | 0.81907   |
| H | 6.375517  | -0.212493 | -0.632632 | H | -6.317246 | -1.217782 | 0.821614  |
| C | -4.28689  | 1.079822  | 0.370127  | C | 3.779585  | 1.768664  | -0.512268 |
| C | -5.015934 | 0.458262  | 1.393204  | C | 4.540373  | 1.170391  | -1.526992 |
| C | -4.415639 | 0.617838  | -0.948883 | C | 4.004816  | 1.408199  | 0.823992  |
| C | -5.876429 | -0.598735 | 1.091728  | C | 5.525518  | 0.237401  | -1.200916 |
| H | -4.903839 | 0.798846  | 2.436559  | H | 4.349616  | 1.424735  | -2.583381 |
| C | -5.288419 | -0.433115 | -1.235032 | C | 4.997894  | 0.47719   | 1.133932  |
| H | -3.819083 | 1.087166  | -1.752936 | H | 3.382018  | 1.850801  | 1.62207   |
| C | -6.025305 | -1.047772 | -0.221422 | C | 5.762565  | -0.116171 | 0.128084  |
| H | -6.719388 | -1.872581 | -0.453682 | H | 6.531038  | -0.867561 | 0.376511  |
| H | 0.862604  | -4.574269 | 1.609248  | H | -0.445849 | -4.719035 | 0.227273  |
| C | -1.204063 | -4.116766 | 1.166262  | C | 0.510482  | -3.805998 | 1.947815  |
| C | -1.486605 | -5.486841 | 1.035695  | C | 1.007136  | -5.05115  | 2.36972   |
| C | -2.256338 | -3.18724  | 1.107747  | C | 0.669791  | -2.682966 | 2.777134  |
| C | -2.795929 | -5.928529 | 0.863483  | C | 1.641626  | -5.179332 | 3.603613  |
| H | -0.673617 | -6.208602 | 1.072524  | H | 0.89366   | -5.92193  | 1.728197  |
| C | -3.564239 | -3.638278 | 0.939448  | C | 1.305315  | -2.820572 | 4.010715  |

|   |           |           |           |   |           |           |           |
|---|-----------|-----------|-----------|---|-----------|-----------|-----------|
| H | -2.056965 | -2.122964 | 1.190489  | H | 0.302079  | -1.709326 | 2.46791   |
| C | -3.839906 | -5.003054 | 0.81868   | C | 1.790689  | -4.062139 | 4.428445  |
| H | -2.999861 | -6.991428 | 0.769868  | H | 2.013652  | -6.149484 | 3.920906  |
| H | -4.379876 | -2.918232 | 0.908948  | H | 1.421695  | -1.948276 | 4.647516  |
| H | -4.864772 | -5.341711 | 0.692509  | C | -2.077484 | -2.963524 | -0.666548 |
| C | 1.822332  | -2.280809 | 2.52326   | C | -2.933469 | -4.069375 | -0.663474 |
| C | 2.903276  | -3.166155 | 2.499604  | C | -2.182663 | -2.015565 | -1.698815 |
| C | 1.980141  | -1.018984 | 3.124406  | C | -3.878715 | -4.247011 | -1.675101 |
| C | 4.118312  | -2.814869 | 3.093111  | H | -2.886547 | -4.783139 | 0.155194  |
| H | 2.833806  | -4.12981  | 2.005694  | C | -3.132892 | -2.181862 | -2.698136 |
| C | 3.183719  | -0.670967 | 3.712166  | H | -1.50963  | -1.164585 | -1.720659 |
| H | 1.152868  | -0.317112 | 3.1108    | C | -3.985299 | -3.296759 | -2.699224 |
| C | 4.263496  | -1.569088 | 3.712931  | H | -4.53385  | -5.10989  | -1.640236 |
| H | 4.940235  | -3.52064  | 3.057056  | H | -3.227828 | -1.45609  | -3.499592 |
| H | 3.31485   | 0.299149  | 4.180656  | O | 2.135854  | -2.016252 | -1.01722  |
| O | 1.85708   | -2.247528 | -1.204758 | O | 2.955777  | -4.315874 | -0.247544 |
| O | 2.311923  | -4.741078 | -0.868723 | O | 1.631989  | -4.294167 | -2.255226 |
| O | 0.26126   | -4.088454 | -2.201345 | C | 3.686977  | -3.681136 | 0.794293  |
| C | 3.209201  | -4.740261 | -1.976474 | C | 5.158492  | -3.710414 | 0.448993  |
| C | 3.003028  | -5.977166 | -2.821338 | H | 3.495493  | -4.272849 | 1.736226  |
| H | 4.244177  | -4.73653  | -1.530172 | H | 3.331867  | -2.625016 | 0.931109  |
| H | 3.069535  | -3.799774 | -2.575703 | H | 5.736959  | -3.24     | 1.281486  |
| H | 3.795035  | -6.020893 | -3.606506 | H | 5.503043  | -4.761937 | 0.306056  |
| H | 3.065502  | -6.894763 | -2.189331 | H | 5.35529   | -3.14564  | -0.495109 |
| H | 2.002506  | -5.957922 | -3.317046 | C | 0.402843  | -4.234344 | -2.960525 |
| C | -0.85709  | -3.220911 | -2.374425 | C | -0.16207  | -5.630165 | -3.116233 |
| C | -1.608241 | -3.670101 | -3.603353 | H | 0.638215  | -3.803112 | -3.975648 |
| H | -0.48074  | -2.165181 | -2.481167 | H | -0.324528 | -3.556115 | -2.436143 |
| H | -1.499159 | -3.294228 | -1.453442 | H | -1.013782 | -5.606616 | -3.836781 |
| H | -2.527812 | -3.046231 | -3.718728 | H | 0.626506  | -6.319062 | -3.504509 |
| H | -0.969471 | -3.555162 | -4.511177 | H | -0.526118 | -6.030167 | -2.140251 |
| H | -1.900728 | -4.743198 | -3.512836 | H | 1.420559  | -1.255741 | -1.041446 |
| H | 1.234494  | -1.430879 | -1.173262 | C | -6.881837 | 0.718449  | -1.020237 |
| C | 6.426166  | 1.910069  | 1.096579  | C | -4.330703 | -1.589737 | 2.678678  |
| C | 4.661829  | -1.107881 | -2.519866 | C | 6.365577  | -0.404283 | -2.298731 |
| C | -6.687493 | -1.268297 | 2.194175  | C | 5.267406  | 0.11475   | 2.588628  |
| C | -5.440578 | -0.921405 | -2.671227 | F | -7.394353 | -0.509581 | -1.362982 |
| F | 7.193959  | 0.853076  | 1.522728  | F | -6.618096 | 1.322768  | -2.22482  |
| F | 5.982634  | 2.495575  | 2.257022  | F | -7.966264 | 1.40694   | -0.530411 |
| F | 7.342839  | 2.806805  | 0.600419  | F | -4.561299 | -1.240696 | 3.987497  |
| F | 3.575848  | -1.472838 | -3.271066 | F | -5.178347 | -2.650733 | 2.463619  |
| F | 5.661856  | -0.926244 | -3.449573 | F | -3.082698 | -2.16286  | 2.698473  |
| F | 5.036346  | -2.258648 | -1.867521 | F | 6.620559  | -1.740806 | -2.108148 |
| F | -8.018303 | -0.927592 | 2.200869  | F | 7.614318  | 0.154476  | -2.442762 |
| F | -6.26352  | -0.997416 | 3.471433  | F | 5.823524  | -0.335436 | -3.557721 |



|   |           |           |           |   |           |           |           |
|---|-----------|-----------|-----------|---|-----------|-----------|-----------|
| F | -6.694105 | -2.641945 | 2.125182  | F | 6.196904  | 0.916743  | 3.20619   |
| F | -4.569137 | -1.926262 | -3.017909 | F | 5.750151  | -1.159176 | 2.778442  |
| F | -5.243482 | 0.0435    | -3.626927 | F | 4.169631  | 0.179474  | 3.411205  |
| F | -6.678765 | -1.441006 | -2.964557 | H | 2.283078  | -4.158873 | 5.392369  |
| O | 5.39643   | -1.13333  | 4.330806  | O | -4.873875 | -3.363794 | -3.72962  |
| C | 6.530259  | -1.986601 | 4.339     | C | -5.797709 | -4.441276 | -3.754984 |
| H | 6.87731   | -2.205502 | 3.320466  | H | -6.437939 | -4.444236 | -2.863032 |
| H | 7.309369  | -1.442095 | 4.875464  | H | -6.414701 | -4.284043 | -4.641347 |
| H | 6.321153  | -2.930107 | 4.860733  | H | -5.286645 | -5.409967 | -3.836436 |

(R)-TS4-mcp

|   |           |           |           |
|---|-----------|-----------|-----------|
| C | -2.276212 | -3.272056 | -0.095349 |
| P | -0.110664 | -4.024105 | 0.651677  |
| C | -1.150356 | 5.772313  | 3.975905  |
| C | -2.044824 | 5.112846  | 3.171024  |
| C | -1.592134 | 4.35264   | 2.056772  |
| C | -0.205572 | 4.293227  | 1.765391  |
| C | 0.696704  | 4.984239  | 2.623956  |
| C | 0.236388  | 5.700822  | 3.700604  |
| H | -3.588434 | 3.775133  | 1.429834  |
| H | -1.496178 | 6.357891  | 4.840364  |
| H | -3.125573 | 5.156059  | 3.373733  |
| C | -2.51083  | 3.657963  | 1.230876  |
| C | 0.246992  | 3.524645  | 0.649969  |
| H | 1.775822  | 4.925762  | 2.408137  |
| H | 0.940696  | 6.22591   | 4.363269  |
| C | -0.66953  | 2.729956  | -0.047918 |
| C | -2.077945 | 2.862992  | 0.190928  |
| C | 1.665454  | 3.502282  | 0.271752  |
| C | 2.35403   | 4.700391  | -0.087268 |
| C | 2.326191  | 2.273469  | 0.167081  |
| C | 1.705448  | 5.967585  | -0.132515 |
| C | 3.725728  | 4.633863  | -0.442027 |
| C | 3.715229  | 2.213256  | -0.173987 |
| C | 2.393705  | 7.101123  | -0.487089 |
| H | 0.634058  | 6.020444  | 0.117981  |
| C | 4.419604  | 5.825132  | -0.79377  |
| C | 4.388081  | 3.37959   | -0.460626 |
| C | 3.768921  | 7.03301   | -0.814841 |
| H | 1.882988  | 8.074983  | -0.524256 |
| H | 5.486424  | 5.753623  | -1.05476  |
| H | 5.457939  | 3.3528    | -0.723057 |
| H | 4.30146   | 7.95505   | -1.090142 |
| O | 1.68809   | 1.101903  | 0.508053  |
| O | -0.287511 | 1.896399  | -1.074045 |

(S)-TS4-mcp

|   |           |           |           |
|---|-----------|-----------|-----------|
| C | -0.182070 | -3.880299 | 1.368074  |
| P | 1.334568  | -2.585006 | 2.686164  |
| C | -3.891903 | 5.000821  | 3.652190  |
| C | -4.442117 | 3.973575  | 2.927668  |
| C | -3.719443 | 3.373769  | 1.858878  |
| C | -2.428934 | 3.857679  | 1.527288  |
| C | -1.884112 | 4.921375  | 2.302053  |
| C | -2.595294 | 5.474242  | 3.337989  |
| H | -5.310386 | 1.997170  | 1.336976  |
| H | -4.445398 | 5.463957  | 4.482165  |
| H | -5.447294 | 3.592155  | 3.162135  |
| C | -4.274263 | 2.301542  | 1.117052  |
| C | -1.706415 | 3.25153   | 0.455177  |
| H | -0.874192 | 5.286722  | 2.055507  |
| H | -2.164382 | 6.29016   | 3.937449  |
| C | -2.211126 | 2.089000  | -0.139103 |
| C | -3.552270 | 1.657584  | 0.133400  |
| C | -0.420484 | 3.799104  | 0.007304  |
| C | -0.320738 | 5.143143  | -0.465599 |
| C | 0.699934  | 2.963981  | -0.054812 |
| C | -1.450288 | 6.006437  | -0.555006 |
| C | 0.937774  | 5.638728  | -0.892281 |
| C | 1.966246  | 3.468687  | -0.488965 |
| C | -1.321467 | 7.293926  | -1.013238 |
| H | -2.436435 | 5.618534  | -0.254114 |
| C | 1.047816  | 6.981432  | -1.350178 |
| C | 2.069251  | 4.784181  | -0.882747 |
| C | -0.05703  | 7.792842  | -1.407868 |
| H | -2.200913 | 7.951523  | -1.082871 |
| H | 2.036467  | 7.349965  | -1.663248 |
| H | 3.038544  | 5.190265  | -1.214057 |
| H | 0.02342   | 8.830013  | -1.764762 |
| O | 0.642877  | 1.669386  | 0.411126  |
| O | -1.514128 | 1.398826  | -1.104598 |

|   |           |           |           |   |           |           |           |
|---|-----------|-----------|-----------|---|-----------|-----------|-----------|
| P | 0.61507   | 0.494009  | -0.680188 | P | -0.107634 | 0.545784  | -0.637951 |
| O | 1.289569  | 0.048604  | -1.935917 | O | 0.654994  | 0.274541  | -1.896146 |
| O | -0.247706 | -0.477694 | 0.160888  | O | -0.450343 | -0.606701 | 0.335489  |
| H | -1.826755 | -1.312854 | 0.251388  | H | -0.385251 | -2.442142 | -0.069791 |
| N | -2.410603 | -2.104847 | 0.568212  | N | -0.052787 | -3.402907 | 0.107892  |
| C | 4.430512  | 0.932953  | -0.216307 | C | 3.154694  | 2.61018   | -0.541628 |
| C | 4.346086  | 0.100767  | -1.341932 | C | 3.430421  | 1.864281  | -1.696815 |
| C | 5.226065  | 0.552333  | 0.870976  | C | 4.041257  | 2.571182  | 0.540968  |
| C | 5.076988  | -1.089259 | -1.374833 | C | 4.621461  | 1.139605  | -1.781374 |
| H | 3.691418  | 0.367882  | -2.194808 | H | 2.701621  | 1.833065  | -2.528862 |
| C | 5.944474  | -0.644592 | 0.823694  | C | 5.214449  | 1.818862  | 0.449689  |
| H | 5.286992  | 1.195037  | 1.764754  | H | 3.81355   | 3.131993  | 1.462950  |
| C | 5.878723  | -1.471396 | -0.297897 | C | 5.520463  | 1.112252  | -0.714204 |
| H | 6.457931  | -2.409261 | -0.335795 | H | 6.464421  | 0.547392  | -0.790858 |
| C | -3.057515 | 2.22323   | -0.686859 | C | -4.19042  | 0.597499  | -0.646918 |
| C | -4.211774 | 1.635171  | -0.152248 | C | -5.074549 | -0.295013 | -0.024671 |
| C | -2.87708  | 2.238747  | -2.079421 | C | -3.977579 | 0.494854  | -2.031490 |
| C | -5.172269 | 1.080625  | -1.000814 | C | -5.743986 | -1.261252 | -0.777563 |
| H | -4.366569 | 1.612422  | 0.939557  | H | -5.243293 | -0.236533 | 1.063736  |
| C | -3.848541 | 1.684675  | -2.914197 | C | -4.646506 | -0.482852 | -2.768900 |
| H | -1.960777 | 2.686397  | -2.507913 | H | -3.276689 | 1.188468  | -2.533360 |
| C | -5.003589 | 1.105574  | -2.385456 | C | -5.536051 | -1.365219 | -2.152950 |
| H | -5.775637 | 0.683673  | -3.050912 | H | -6.067884 | -2.129895 | -2.743422 |
| H | -2.797417 | -4.119991 | 0.349563  | H | 0.321035  | -4.831166 | 1.544414  |
| C | -2.116975 | -3.320108 | -1.571176 | C | -1.418769 | -3.685441 | 2.171984  |
| C | -2.272742 | -4.561372 | -2.196927 | C | -1.615946 | -4.546805 | 3.256670  |
| C | -1.845359 | -2.170285 | -2.369569 | C | -2.421475 | -2.719628 | 1.859612  |
| C | -2.160898 | -4.675092 | -3.581835 | C | -2.777487 | -4.470032 | 4.023128  |
| H | -2.488687 | -5.462108 | -1.59952  | H | -0.848348 | -5.292391 | 3.521362  |
| C | -1.735758 | -2.301874 | -3.745843 | C | -3.571667 | -2.66221  | 2.632870  |
| H | -1.711593 | -1.197493 | -1.909337 | H | -2.272985 | -2.023887 | 1.038117  |
| C | -1.889749 | -3.549562 | -4.356759 | C | -3.756636 | -3.529893 | 3.712360  |
| H | -2.284258 | -5.659411 | -4.058763 | H | -2.914147 | -5.152987 | 4.875100  |
| H | -1.523656 | -1.40944  | -4.360665 | H | -4.356713 | -1.927884 | 2.386286  |
| H | -1.793223 | -3.639894 | -5.450092 | H | -4.676155 | -3.467894 | 4.314841  |
| C | -2.845424 | -1.989426 | 1.914143  | C | 0.953971  | -3.856017 | -0.789619 |
| C | -3.763204 | -2.88597  | 2.476502  | C | 1.394444  | -5.1867   | -0.774571 |
| C | -2.372751 | -0.888276 | 2.701377  | C | 1.484431  | -2.955207 | -1.774019 |
| C | -4.212597 | -2.716325 | 3.785082  | C | 2.345060  | -5.635367 | -1.689375 |
| H | -4.159788 | -3.736183 | 1.898689  | H | 0.987841  | -5.917219 | -0.056947 |
| C | -2.823723 | -0.722596 | 3.99399   | C | 2.423391  | -3.408233 | -2.677608 |
| H | -1.642976 | -0.209197 | 2.263537  | H | 1.144672  | -1.918348 | -1.815765 |
| C | -3.747649 | -1.638805 | 4.543235  | C | 2.860554  | -4.75063  | -2.639952 |
| H | -4.931201 | -3.436433 | 4.201853  | H | 2.671360  | -6.684419 | -1.652535 |
| H | -2.465917 | 0.115145  | 4.612561  | H | 2.850188  | -2.721065 | -3.428843 |

|                     |           |           |           |                     |           |           |           |
|---------------------|-----------|-----------|-----------|---------------------|-----------|-----------|-----------|
| O                   | 0.796718  | -2.713486 | 0.857475  | O                   | 1.125021  | -1.044653 | 2.291052  |
| O                   | -0.354003 | -4.713768 | 2.128997  | O                   | 1.031713  | -2.747723 | 4.295813  |
| O                   | 0.921332  | -5.143285 | -0.022149 | O                   | 2.987014  | -2.802963 | 2.689096  |
| C                   | 0.702575  | -4.626046 | 3.075555  | C                   | 1.402423  | -1.667398 | 5.142580  |
| C                   | 1.310447  | -5.990211 | 3.31707   | C                   | 2.561984  | -2.06574  | 6.028891  |
| H                   | 0.230656  | -4.240421 | 4.023444  | H                   | 0.492386  | -1.449822 | 5.770782  |
| H                   | 1.474734  | -3.892564 | 2.71982   | H                   | 1.651877  | -0.764117 | 4.524214  |
| H                   | 2.062652  | -5.91768  | 4.138326  | H                   | 2.762661  | -1.247672 | 6.761040  |
| H                   | 0.519458  | -6.720801 | 3.610327  | H                   | 2.320602  | -3.002327 | 6.585677  |
| H                   | 1.814813  | -6.370489 | 2.396279  | H                   | 3.483512  | -2.244652 | 5.424121  |
| C                   | 1.388148  | -4.674273 | -1.282371 | C                   | 3.512591  | -2.548535 | 1.393137  |
| C                   | 2.337312  | -5.706227 | -1.841449 | C                   | 5.013403  | -2.694434 | 1.459851  |
| H                   | 1.905203  | -3.686815 | -1.131123 | H                   | 3.214594  | -1.510051 | 1.082907  |
| H                   | 0.497343  | -4.526622 | -1.952219 | H                   | 3.056769  | -3.288817 | 0.678321  |
| H                   | 2.865917  | -5.270382 | -2.723847 | H                   | 5.434300  | -2.648393 | 0.427412  |
| H                   | 3.092229  | -5.993467 | -1.070684 | H                   | 5.455022  | -1.870605 | 2.072493  |
| H                   | 1.785441  | -6.623993 | -2.152714 | H                   | 5.290044  | -3.669422 | 1.927014  |
| H                   | 0.388549  | -1.807288 | 0.573199  | H                   | 0.454490  | -0.838216 | 1.526604  |
| C                   | 6.79669   | -1.059094 | 2.015863  | C                   | 6.179660  | 1.751874  | 1.626054  |
| C                   | 4.988617  | -1.994163 | -2.597834 | C                   | 4.950468  | 0.368374  | -3.053875 |
| C                   | -6.417204 | 0.42776   | -0.413117 | C                   | -6.733078 | -2.204018 | -0.104232 |
| C                   | -3.639312 | 1.706146  | -4.424513 | C                   | -4.40127  | -0.601396 | -4.269821 |
| F                   | 6.128549  | -1.804631 | 2.95722   | F                   | 6.145114  | 0.56141   | 2.313370  |
| F                   | 7.322797  | -0.011101 | 2.732534  | F                   | 5.981180  | 2.70519   | 2.593938  |
| F                   | 7.889872  | -1.828358 | 1.696761  | F                   | 7.502329  | 1.894511  | 1.279758  |
| F                   | 6.111395  | -2.758589 | -2.818586 | F                   | 6.296223  | 0.268247  | -3.320674 |
| F                   | 3.971802  | -2.917141 | -2.548905 | F                   | 4.519841  | -0.936468 | -3.054719 |
| F                   | 4.797291  | -1.336587 | -3.786902 | F                   | 4.421344  | 0.902599  | -4.201692 |
| F                   | -6.307381 | -0.932532 | -0.241619 | F                   | -6.643813 | -3.510802 | -0.518358 |
| F                   | -7.551761 | 0.576438  | -1.172534 | F                   | -8.051669 | -1.876375 | -0.307382 |
| F                   | -6.777017 | 0.892016  | 0.828376  | F                   | -6.615469 | -2.27699  | 1.263740  |
| F                   | -4.795255 | 1.618106  | -5.162027 | F                   | -5.486218 | -1.050809 | -4.984645 |
| F                   | -2.865779 | 0.671369  | -4.89543  | F                   | -3.396250 | -1.476097 | -4.604433 |
| F                   | -3.020067 | 2.835463  | -4.897666 | F                   | -4.053916 | 0.573775  | -4.887192 |
| O                   | -4.125261 | -1.370403 | 5.838913  | O                   | 3.799171  | -5.080512 | -3.589405 |
| C                   | -5.043479 | -2.283525 | 6.433601  | C                   | 4.252573  | -6.431089 | -3.591672 |
| H                   | -4.604943 | -3.309787 | 6.477174  | H                   | 3.404420  | -7.130633 | -3.788414 |
| H                   | -5.186283 | -1.869154 | 7.464068  | H                   | 4.988548  | -6.452801 | -4.435511 |
| H                   | -6.009278 | -2.290073 | 5.872611  | H                   | 4.752760  | -6.679471 | -2.624409 |
| <i>(R)</i> -product |           |           |           | <i>(S)</i> -product |           |           |           |
| C                   | -4.425634 | 5.265827  | 3.725723  | C                   | 0.173827  | -3.934791 | 1.075299  |
| C                   | -4.845889 | 4.029951  | 3.301889  | P                   | 1.385549  | -3.603672 | -0.312861 |
| C                   | -4.14858  | 3.343694  | 2.268841  | C                   | 2.171089  | 7.033436  | -2.914974 |

|   |           |           |           |   |           |           |           |
|---|-----------|-----------|-----------|---|-----------|-----------|-----------|
| C | -3.021629 | 3.952933  | 1.660393  | C | 2.984588  | 5.955954  | -2.668783 |
| C | -2.606338 | 5.231506  | 2.128945  | C | 2.558447  | 4.910433  | -1.802889 |
| C | -3.289365 | 5.868839  | 3.135302  | C | 1.291419  | 4.995876  | -1.171611 |
| H | -5.470867 | 1.619767  | 2.297936  | C | 0.466919  | 6.120929  | -1.457529 |
| H | -4.959709 | 5.797395  | 4.527499  | C | 0.89529   | 7.111028  | -2.306962 |
| H | -5.723805 | 3.545163  | 3.755669  | H | 4.377307  | 3.74713   | -2.046379 |
| C | -4.566082 | 2.057051  | 1.844438  | H | 2.495456  | 7.84181   | -3.587154 |
| C | -2.321789 | 3.255262  | 0.628851  | H | 3.976391  | 5.877312  | -3.139623 |
| H | -1.719556 | 5.699141  | 1.671865  | C | 3.382106  | 3.77984   | -1.573302 |
| H | -2.958196 | 6.854293  | 3.496707  | C | 0.870125  | 3.943159  | -0.302434 |
| C | -2.691985 | 1.943898  | 0.31858   | H | -0.528111 | 6.180065  | -0.988037 |
| C | -3.869426 | 1.357453  | 0.881662  | H | 0.249297  | 7.974451  | -2.527392 |
| C | -1.156216 | 3.850744  | -0.03458  | C | 1.663498  | 2.79947   | -0.178314 |
| C | -1.25738  | 5.080563  | -0.754485 | C | 2.961247  | 2.735389  | -0.777756 |
| C | 0.056654  | 3.157515  | -0.03835  | C | -0.429347 | 3.998935  | 0.377204  |
| C | -2.496832 | 5.760079  | -0.923172 | C | -0.753249 | 5.060827  | 1.275896  |
| C | -0.096919 | 5.631417  | -1.355896 | C | -1.334895 | 2.947402  | 0.209931  |
| C | 1.24365   | 3.755434  | -0.568473 | C | 0.183438  | 6.076498  | 1.618939  |
| C | -2.567196 | 6.928935  | -1.640467 | C | -2.036401 | 5.092256  | 1.879064  |
| H | -3.4027   | 5.32511   | -0.471237 | C | -2.657466 | 3.02076   | 0.751546  |
| C | -0.194691 | 6.849234  | -2.084665 | C | -0.150818 | 7.072946  | 2.502595  |
| C | 1.147513  | 4.963788  | -1.223796 | H | 1.187042  | 6.043531  | 1.165401  |
| C | -1.40352  | 7.48429   | -2.223981 | C | -2.361919 | 6.142295  | 2.782233  |
| H | -3.530377 | 7.444886  | -1.772571 | C | -2.9796   | 4.077755  | 1.57669   |
| H | 0.718006  | 7.265965  | -2.537334 | C | -1.439198 | 7.11144   | 3.087374  |
| H | 2.048013  | 5.433357  | -1.652225 | H | 0.580934  | 7.850758  | 2.768784  |
| H | -1.483388 | 8.423965  | -2.790721 | H | -3.365781 | 6.155381  | 3.233615  |
| O | 0.189679  | 1.921754  | 0.579066  | H | -3.989669 | 4.149679  | 2.012644  |
| O | -2.00964  | 1.212678  | -0.645504 | H | -1.685974 | 7.922123  | 3.789165  |
| P | -0.523348 | 0.623473  | -0.187752 | O | -1.028461 | 1.855978  | -0.595092 |
| O | 0.094966  | 0.429315  | -1.622869 | O | 1.282223  | 1.736792  | 0.628003  |
| O | -0.488208 | -0.544656 | 0.720925  | P | 0.041208  | 0.770931  | 0.073812  |
| H | 0.428689  | -2.354609 | 0.59418   | O | -0.434399 | -0.083614 | 1.184194  |
| N | 0.907911  | -3.250526 | 0.649488  | O | 0.478278  | 0.032092  | -1.24937  |
| C | 2.553667  | 3.13203   | -0.380062 | H | -0.831265 | -2.110606 | 0.896891  |
| C | 3.404482  | 2.921931  | -1.472954 | N | -1.009759 | -3.113155 | 0.907962  |
| C | 2.9831    | 2.79146   | 0.910702  | C | -3.68151  | 2.032587  | 0.414226  |
| C | 4.675449  | 2.382634  | -1.267752 | C | -4.498653 | 1.492847  | 1.41728   |
| H | 3.065876  | 3.169429  | -2.493286 | C | -3.897059 | 1.668096  | -0.921911 |
| C | 4.266255  | 2.276885  | 1.101797  | C | -5.531806 | 0.617884  | 1.077735  |
| H | 2.29791   | 2.918948  | 1.76741   | H | -4.320331 | 1.749177  | 2.475287  |
| C | 5.118206  | 2.062917  | 0.016998  | C | -4.939031 | 0.796855  | -1.245786 |
| H | 6.122746  | 1.63242   | 0.169444  | H | -3.235934 | 2.063635  | -1.713117 |
| C | -4.372281 | 0.059437  | 0.432527  | C | -5.76342  | 0.26531   | -0.253025 |
| C | -4.766828 | -0.905139 | 1.370075  | H | -6.579048 | -0.431841 | -0.512571 |

|   |           |           |           |   |           |           |           |
|---|-----------|-----------|-----------|---|-----------|-----------|-----------|
| C | -4.524488 | -0.203663 | -0.935859 | C | 3.854007  | 1.598927  | -0.551216 |
| C | -5.327108 | -2.10817  | 0.937336  | C | 4.485027  | 0.981527  | -1.639755 |
| H | -4.62605  | -0.720043 | 2.448528  | C | 4.117029  | 1.148866  | 0.750602  |
| C | -5.095669 | -1.407795 | -1.351897 | C | 5.374337  | -0.07194  | -1.422444 |
| H | -4.181542 | 0.538497  | -1.678608 | H | 4.268783  | 1.317951  | -2.667859 |
| C | -5.50082  | -2.367735 | -0.422944 | C | 5.021619  | 0.105908  | 0.951809  |
| H | -5.942685 | -3.322066 | -0.757421 | H | 3.594063  | 1.612829  | 1.606025  |
| C | 1.304592  | -3.823384 | -0.615301 | C | 5.650807  | -0.515736 | -0.128955 |
| H | 1.856726  | -4.747466 | -0.429373 | H | 6.344649  | -1.357188 | 0.037553  |
| C | 0.138449  | -4.163084 | -1.534706 | H | -0.108393 | -4.980312 | 0.925915  |
| C | 0.223063  | -5.29899  | -2.352946 | C | 0.829442  | -3.807694 | 2.443098  |
| C | -1.003185 | -3.355344 | -1.613328 | C | 1.417255  | -4.936634 | 3.031935  |
| C | -0.811524 | -5.627249 | -3.228926 | C | 0.873042  | -2.584045 | 3.125159  |
| H | 1.105437  | -5.932704 | -2.29997  | C | 2.030582  | -4.850941 | 4.282487  |
| C | -2.035697 | -3.683422 | -2.493444 | H | 1.386905  | -5.891709 | 2.511623  |
| H | -1.099049 | -2.481344 | -0.977806 | C | 1.484687  | -2.502637 | 4.377277  |
| C | -1.94514  | -4.816449 | -3.303071 | H | 0.425329  | -1.696797 | 2.690143  |
| H | -0.733549 | -6.518187 | -3.846341 | C | 2.064765  | -3.630957 | 4.95967   |
| H | -2.916744 | -3.047365 | -2.551253 | H | 2.471579  | -5.738262 | 4.729096  |
| H | -2.755111 | -5.066831 | -3.983118 | H | 1.508024  | -1.54899  | 4.89762   |
| C | 1.579901  | -3.454921 | 1.865013  | H | 2.538213  | -3.560738 | 5.935366  |
| C | 2.515405  | -4.473273 | 2.092281  | C | -2.080912 | -3.522962 | 0.089062  |
| C | 1.252996  | -2.609666 | 2.948885  | C | -2.619281 | -4.814887 | 0.166377  |
| C | 3.093394  | -4.658349 | 3.35547   | C | -2.683092 | -2.612491 | -0.799245 |
| H | 2.818839  | -5.142869 | 1.294135  | C | -3.705406 | -5.197509 | -0.623417 |
| C | 1.825194  | -2.792745 | 4.197088  | H | -2.205706 | -5.53453  | 0.867383  |
| H | 0.538934  | -1.806463 | 2.792089  | C | -3.778627 | -2.981201 | -1.571055 |
| C | 2.750779  | -3.823395 | 4.418539  | H | -2.281574 | -1.605986 | -0.882797 |
| H | 3.810657  | -5.461582 | 3.483236  | C | -4.297128 | -4.27983  | -1.497692 |
| H | 1.567518  | -2.138717 | 5.02479   | H | -4.088116 | -6.207907 | -0.531561 |
| P | 2.538485  | -2.706367 | -1.474016 | H | -4.239134 | -2.272862 | -2.256491 |
| O | 2.079465  | -1.27595  | -1.566424 | O | 1.713508  | -2.142894 | -0.493929 |
| O | 3.938528  | -2.952261 | -0.692991 | O | 2.670776  | -4.57956  | -0.103554 |
| O | 2.969852  | -3.401467 | -2.88024  | O | 0.739623  | -4.345804 | -1.603844 |
| C | 4.247086  | -2.01469  | 0.338653  | C | 3.685711  | -4.060727 | 0.756516  |
| C | 5.669054  | -1.539494 | 0.152289  | C | 5.032339  | -4.246222 | 0.097684  |
| H | 4.142144  | -2.559818 | 1.321157  | H | 3.638762  | -4.647758 | 1.718442  |
| H | 3.523375  | -1.155859 | 0.294728  | H | 3.490506  | -2.972611 | 0.963994  |
| H | 5.957532  | -0.898883 | 1.021518  | H | 5.826345  | -3.885021 | 0.795937  |
| H | 6.361533  | -2.412988 | 0.09309   | H | 5.205086  | -5.323738 | -0.135368 |
| H | 5.77274   | -0.944784 | -0.787927 | H | 5.095965  | -3.666011 | -0.854952 |
| C | 2.158414  | -2.91923  | -3.954993 | C | 0.310123  | -3.395418 | -2.582751 |
| C | 2.739671  | -3.423291 | -5.251454 | C | -0.124673 | -4.146332 | -3.81486  |
| H | 2.152775  | -1.794666 | -3.917133 | H | 1.168173  | -2.70169  | -2.800584 |
| H | 1.117874  | -3.312467 | -3.788593 | H | -0.537734 | -2.808855 | -2.1318   |

|   |           |           |           |   |           |           |           |
|---|-----------|-----------|-----------|---|-----------|-----------|-----------|
| H | 2.108389  | -3.068178 | -6.100592 | H | -0.483025 | -3.417975 | -4.581054 |
| H | 3.781467  | -3.04442  | -5.382877 | H | 0.727713  | -4.733271 | -4.232953 |
| H | 2.770003  | -4.53903  | -5.256266 | H | -0.950679 | -4.854959 | -3.566542 |
| H | 0.841398  | -0.249359 | -1.630792 | H | 0.94849   | -0.837486 | -1.03193  |
| C | 4.753935  | 1.96989   | 2.513681  | C | -5.174275 | 0.443503  | -2.71009  |
| C | 5.607551  | 2.138517  | -2.449049 | C | -6.43543  | 0.059804  | 2.171977  |
| C | -5.780512 | -3.142339 | 1.962485  | C | 6.061568  | -0.748422 | -2.602768 |
| C | -5.303916 | -1.658506 | -2.840781 | C | 5.34917   | -0.371534 | 2.36181   |
| F | 3.767619  | 1.592949  | 3.390072  | F | -6.076441 | -0.569061 | -2.92319  |
| F | 5.369077  | 3.03195   | 3.132225  | F | -4.045032 | 0.033782  | -3.377448 |
| F | 5.68065   | 0.957698  | 2.58634   | F | -5.651365 | 1.487026  | -3.466421 |
| F | 6.632009  | 3.049206  | -2.550512 | F | -7.531591 | 0.846742  | 2.439174  |
| F | 6.243262  | 0.920517  | -2.418307 | F | -6.968341 | -1.175376 | 1.899527  |
| F | 5.001964  | 2.17573   | -3.680351 | F | -5.82728  | -0.089512 | 3.393701  |
| F | -5.080741 | -3.121163 | 3.143091  | F | 6.174548  | -2.112671 | -2.482604 |
| F | -5.695546 | -4.443864 | 1.534305  | F | 7.350607  | -0.322953 | -2.818674 |
| F | -7.092952 | -3.000434 | 2.34836   | F | 5.440368  | -0.564419 | -3.813221 |
| F | -6.436193 | -1.07437  | -3.354643 | F | 6.598649  | -0.002183 | 2.799845  |
| F | -5.421138 | -2.982938 | -3.187486 | F | 5.338239  | -1.739182 | 2.50476   |
| F | -4.289711 | -1.191901 | -3.641327 | F | 4.501554  | 0.080699  | 3.340942  |
| O | 3.255506  | -3.916212 | 5.691974  | O | -5.368211 | -4.547445 | -2.310346 |
| C | 4.182072  | -4.951158 | 5.958551  | C | -5.935623 | -5.843024 | -2.252362 |
| H | 4.447149  | -4.856332 | 7.013718  | H | -6.321257 | -6.073576 | -1.24958  |
| H | 3.74463   | -5.944285 | 5.783941  | H | -6.764073 | -5.841474 | -2.963722 |
| H | 5.09126   | -4.851753 | 5.348519  | H | -5.212294 | -6.617741 | -2.54297  |

(R)-TS4-2

|   |           |           |           |
|---|-----------|-----------|-----------|
| C | 1.417228  | -3.370829 | 1.19031   |
| P | 2.190388  | -2.936917 | -1.006427 |
| C | -4.723663 | 5.534005  | 2.854318  |
| C | -5.135341 | 4.246293  | 2.619627  |
| C | -4.409567 | 3.404161  | 1.731561  |
| C | -3.263229 | 3.909467  | 1.067339  |
| C | -2.857601 | 5.247271  | 1.339486  |
| C | -3.567248 | 6.035983  | 2.210606  |
| H | -5.741132 | 1.7089    | 1.988741  |
| H | -5.279963 | 6.186321  | 3.543223  |
| H | -6.028952 | 3.83948   | 3.11652   |
| C | -4.816959 | 2.065559  | 1.505744  |
| C | -2.537235 | 3.059508  | 0.178814  |
| H | -1.955887 | 5.635333  | 0.839121  |
| H | -3.243536 | 7.066396  | 2.420298  |
| C | -2.889451 | 1.708919  | 0.083389  |
| C | -4.08778  | 1.218749  | 0.697309  |
| C | -1.380088 | 3.557473  | -0.574494 |

(S)-TS4-2

|   |           |           |           |
|---|-----------|-----------|-----------|
| C | 0.751406  | -3.624905 | -0.629093 |
| P | -0.921453 | -3.730266 | 1.059215  |
| C | -2.701259 | 6.334843  | 3.565914  |
| C | -3.448515 | 5.247323  | 3.188933  |
| C | -2.982838 | 4.364682  | 2.174972  |
| C | -1.74371  | 4.62427   | 1.536428  |
| C | -0.989511 | 5.757231  | 1.955082  |
| C | -1.454975 | 6.587473  | 2.944436  |
| H | -4.731416 | 3.079111  | 2.257906  |
| H | -3.056196 | 7.016272  | 4.352792  |
| H | -4.416687 | 5.034183  | 3.66664   |
| C | -3.742908 | 3.229909  | 1.794603  |
| C | -1.276153 | 3.730223  | 0.526064  |
| H | -0.018377 | 5.949722  | 1.471707  |
| H | -0.86283  | 7.45653   | 3.267699  |
| C | -1.978692 | 2.545052  | 0.283991  |
| C | -3.272685 | 2.330342  | 0.861269  |
| C | -0.034968 | 3.992516  | -0.211945 |

|   |           |           |           |   |           |           |           |
|---|-----------|-----------|-----------|---|-----------|-----------|-----------|
| C | -1.513592 | 4.65643   | -1.476702 | C | 0.119038  | 5.186327  | -0.979605 |
| C | -0.152493 | 2.892232  | -0.477165 | C | 0.96756   | 3.015659  | -0.245684 |
| C | -2.768819 | 5.275542  | -1.741745 | C | -0.920977 | 6.152136  | -1.104231 |
| C | -0.368889 | 5.138285  | -2.160322 | C | 1.335709  | 5.416758  | -1.669984 |
| C | 1.007154  | 3.401591  | -1.144818 | C | 2.199508  | 3.259941  | -0.930457 |
| C | -2.866152 | 6.327333  | -2.618413 | C | -0.74244  | 7.289568  | -1.85132  |
| H | -3.665609 | 4.888295  | -1.232334 | H | -1.878118 | 5.965471  | -0.591438 |
| C | -0.493615 | 6.23831   | -3.053974 | C | 1.501094  | 6.610234  | -2.427129 |
| C | 0.884476  | 4.508309  | -1.956086 | C | 2.366676  | 4.4465    | -1.612087 |
| C | -1.71527  | 6.821478  | -3.277807 | C | 0.485058  | 7.527807  | -2.515136 |
| H | -3.840792 | 6.795766  | -2.821232 | H | -1.552786 | 8.027842  | -1.945356 |
| H | 0.409571  | 6.604105  | -3.565347 | H | 2.458436  | 6.775382  | -2.944056 |
| H | 1.769019  | 4.914341  | -2.472765 | H | 3.312749  | 4.65162   | -2.138583 |
| H | -1.816388 | 7.669284  | -3.970938 | H | 0.607544  | 8.449809  | -3.101974 |
| O | 0.012843  | 1.817489  | 0.372588  | O | 0.852839  | 1.855301  | 0.492904  |
| O | -2.165998 | 0.83467   | -0.70517  | O | -1.511561 | 1.601671  | -0.611258 |
| P | -0.672748 | 0.348235  | -0.090122 | P | -0.195482 | 0.676383  | -0.097901 |
| O | 0.016631  | -0.246494 | -1.30253  | O | 0.320487  | -0.008543 | -1.331508 |
| O | -0.776154 | -0.45123  | 1.176791  | O | -0.495178 | -0.154528 | 1.132144  |
| H | 0.441069  | -1.643937 | 1.693605  | H | 1.107167  | -1.606027 | -0.826575 |
| N | 1.306173  | -2.193577 | 1.828296  | N | 1.495937  | -2.505376 | -0.499171 |
| C | 2.329924  | 2.787581  | -0.983381 | C | 3.305068  | 2.294514  | -0.937236 |
| C | 2.650837  | 1.595016  | -1.64215  | C | 3.288048  | 1.193894  | -1.80436  |
| C | 3.301474  | 3.427397  | -0.198682 | C | 4.427162  | 2.52036   | -0.126821 |
| C | 3.927301  | 1.04671   | -1.518295 | C | 4.398239  | 0.355001  | -1.891078 |
| H | 1.895825  | 1.068378  | -2.252472 | H | 2.39174   | 0.981448  | -2.413096 |
| C | 4.578786  | 2.886372  | -0.082019 | C | 5.532233  | 1.676738  | -0.205746 |
| H | 3.050387  | 4.359218  | 0.329852  | H | 4.434147  | 3.369818  | 0.572968  |
| C | 4.890774  | 1.697282  | -0.746972 | C | 5.521551  | 0.604144  | -1.100931 |
| C | -4.575715 | -0.139006 | 0.454605  | C | -4.12208  | 1.214844  | 0.443328  |
| C | -5.104026 | -0.895894 | 1.512233  | C | -4.853834 | 0.487185  | 1.393254  |
| C | -4.575034 | -0.676706 | -0.841153 | C | -4.259874 | 0.901918  | -0.917972 |
| C | -5.640889 | -2.15836  | 1.276036  | C | -5.727724 | -0.520246 | 0.989994  |
| H | -5.087184 | -0.491947 | 2.53616   | H | -4.727278 | 0.703293  | 2.465268  |
| C | -5.1149   | -1.938393 | -1.079778 | C | -5.135552 | -0.10129  | -1.322672 |
| H | -4.134088 | -0.09563  | -1.668734 | H | -3.66007  | 1.450674  | -1.6628   |
| C | -5.652363 | -2.674498 | -0.021912 | C | -5.874525 | -0.80526  | -0.368303 |
| H | 2.325578  | -3.922112 | 1.419911  | H | 1.245581  | -4.51643  | -0.248933 |
| C | 0.231938  | -4.236814 | 0.970535  | C | -0.089462 | -3.857019 | -1.833011 |
| C | 0.448046  | -5.620792 | 0.87256   | C | -0.399936 | -5.184453 | -2.173233 |
| C | -1.076158 | -3.734031 | 0.869324  | C | -0.563203 | -2.809065 | -2.640692 |
| C | -0.621006 | -6.494793 | 0.687979  | C | -1.160147 | -5.466053 | -3.306302 |
| H | 1.46      | -6.013233 | 0.943958  | H | -0.044464 | -5.998501 | -1.545939 |
| C | -2.140041 | -4.615244 | 0.683847  | C | -1.323082 | -3.100034 | -3.77261  |
| H | -1.264027 | -2.665868 | 0.932371  | H | -0.344792 | -1.774927 | -2.39124  |

|   |           |           |           |   |           |           |           |
|---|-----------|-----------|-----------|---|-----------|-----------|-----------|
| C | -1.919845 | -5.992272 | 0.593575  | C | -1.623095 | -4.422211 | -4.110099 |
| H | -0.439245 | -7.563637 | 0.620003  | H | -1.387678 | -6.497461 | -3.56097  |
| H | -3.153075 | -4.226142 | 0.606075  | H | -1.682877 | -2.285169 | -4.39389  |
| H | -2.760872 | -6.665746 | 0.448252  | C | 2.571507  | -2.430049 | 0.434392  |
| C | 2.380742  | -1.441245 | 2.359438  | C | 3.670277  | -3.284374 | 0.304915  |
| C | 3.717361  | -1.842337 | 2.284838  | C | 2.552141  | -1.481927 | 1.471224  |
| C | 2.061675  | -0.236475 | 3.012286  | C | 4.745819  | -3.20316  | 1.190324  |
| C | 4.722723  | -1.068489 | 2.871237  | H | 3.704718  | -3.994209 | -0.517309 |
| H | 4.008099  | -2.741313 | 1.751543  | C | 3.625325  | -1.393016 | 2.348205  |
| C | 3.057508  | 0.529554  | 3.5927    | H | 1.696656  | -0.824097 | 1.58516   |
| H | 1.028819  | 0.094489  | 3.040683  | C | 4.732062  | -2.244733 | 2.213128  |
| C | 4.399353  | 0.120021  | 3.533754  | H | 5.594284  | -3.864296 | 1.055278  |
| H | 5.751543  | -1.400177 | 2.788432  | H | 3.630726  | -0.657242 | 3.145781  |
| H | 2.819822  | 1.461368  | 4.095337  | O | -1.690233 | -2.370338 | 1.327873  |
| O | 2.263804  | -1.396049 | -1.397445 | O | -2.077521 | -4.815003 | 0.661045  |
| O | 3.736906  | -3.450603 | -1.017138 | O | -0.56641  | -4.447148 | 2.503399  |
| O | 1.575951  | -3.755973 | -2.307244 | C | -3.157798 | -4.34318  | -0.133382 |
| C | 4.568246  | -3.003028 | -2.086048 | C | -4.461347 | -4.685284 | 0.552651  |
| C | 5.019709  | -4.186631 | -2.91128  | H | -3.085731 | -4.879574 | -1.123029 |
| H | 5.452898  | -2.495399 | -1.60473  | H | -3.071941 | -3.235515 | -0.293184 |
| H | 4.011058  | -2.257132 | -2.71312  | H | -5.314134 | -4.313303 | -0.067708 |
| H | 5.750816  | -3.841595 | -3.680673 | H | -4.553989 | -5.789431 | 0.68302   |
| H | 5.50904   | -4.949407 | -2.259931 | H | -4.511334 | -4.207768 | 1.5603    |
| H | 4.151311  | -4.666448 | -3.423428 | C | 0.711337  | -4.136657 | 3.032453  |
| C | 0.215004  | -3.380543 | -2.512267 | C | 1.553654  | -5.392607 | 3.106676  |
| C | -0.273955 | -4.070369 | -3.761898 | H | 0.537071  | -3.733646 | 4.071176  |
| H | 0.157052  | -2.259777 | -2.609135 | H | 1.216357  | -3.34452  | 2.415036  |
| H | -0.37162  | -3.703786 | -1.608647 | H | 2.472965  | -5.18757  | 3.70499   |
| H | -1.342984 | -3.801448 | -3.935594 | H | 0.973752  | -6.211853 | 3.596125  |
| H | 0.332007  | -3.750505 | -4.642965 | H | 1.855408  | -5.737886 | 2.08944   |
| H | -0.184928 | -5.177878 | -3.657883 | H | -1.176065 | -1.469886 | 1.193518  |
| H | 1.361915  | -0.8732   | -1.301167 | H | -2.215736 | -4.638219 | -4.995039 |
| O | 5.300107  | 0.945234  | 4.139509  | O | 5.736128  | -2.062655 | 3.115418  |
| C | 6.679973  | 0.633399  | 4.021608  | C | 6.970263  | -2.729716 | 2.88956   |
| H | 6.998601  | 0.615829  | 2.9694    | H | 7.384041  | -2.473548 | 1.904134  |
| H | 7.211636  | 1.42829   | 4.547598  | H | 7.646249  | -2.378433 | 3.670945  |
| H | 6.91818   | -0.331188 | 4.489574  | H | 6.86416   | -3.819776 | 2.969413  |
| H | -5.126657 | -2.351677 | -2.100757 | H | 6.414382  | 1.851906  | 0.429202  |
| H | -6.063849 | -2.747446 | 2.104727  | H | 4.389607  | -0.500359 | -2.584812 |
| H | 4.154175  | 0.085936  | -2.010985 | H | -5.249616 | -0.343133 | -2.390597 |
| H | 5.341186  | 3.386598  | 0.534747  | H | -6.29659  | -1.092998 | 1.739291  |
| C | 6.294248  | 1.122571  | -0.638457 | C | -6.846401 | -1.880583 | -0.830208 |
| C | -6.247693 | -4.051444 | -0.27525  | C | 6.757206  | -0.275249 | -1.219616 |
| F | -5.373556 | -5.091307 | -0.049743 | F | -6.340566 | -2.730601 | -1.786885 |
| F | -7.332546 | -4.361502 | 0.508956  | F | -7.293459 | -2.72747  | 0.155297  |



|           |           |           |           |           |           |           |           |
|-----------|-----------|-----------|-----------|-----------|-----------|-----------|-----------|
| F         | -6.688638 | -4.26624  | -1.558165 | F         | -8.000201 | -1.396109 | -1.399556 |
| F         | 6.394315  | -0.224414 | -0.896811 | F         | 7.301778  | -0.665437 | -0.01749  |
| F         | 7.209285  | 1.688963  | -1.494359 | F         | 6.569845  | -1.459645 | -1.891568 |
| F         | 6.879524  | 1.26001   | 0.599459  | F         | 7.810775  | 0.313774  | -1.8778   |
| (R)-TS4-3 |           |           |           | (S)-TS4-3 |           |           |           |
| C         | -2.784868 | 2.424084  | 1.194783  | C         | -3.618676 | 0.974813  | -0.670719 |
| P         | -3.257424 | 1.759798  | -1.036428 | P         | -3.02606  | 2.448074  | 1.059877  |
| C         | 6.672896  | -2.744912 | 2.90276   | C         | 6.817689  | -0.272143 | 3.566531  |
| C         | 6.453806  | -1.413442 | 2.653413  | C         | 6.16565   | 0.86849   | 3.170171  |
| C         | 5.434202  | -1.003452 | 1.749681  | C         | 5.179832  | 0.820616  | 2.145534  |
| C         | 4.65311   | -1.982976 | 1.084202  | C         | 4.884422  | -0.415472 | 1.515809  |
| C         | 4.899438  | -3.355574 | 1.372812  | C         | 5.573384  | -1.58153  | 1.95532   |
| C         | 5.880598  | -3.725318 | 2.258999  | C         | 6.511995  | -1.511321 | 2.954819  |
| H         | 5.832566  | 1.118019  | 2.006321  | H         | 4.771683  | 2.954302  | 2.209502  |
| H         | 7.457758  | -3.064795 | 3.603781  | H         | 7.576861  | -0.239114 | 4.36168   |
| H         | 7.057337  | -0.639132 | 3.150712  | H         | 6.387712  | 1.838293  | 3.640601  |
| C         | 5.187068  | 0.37299   | 1.513973  | C         | 4.489271  | 1.993995  | 1.74858   |
| C         | 3.6291    | -1.568542 | 0.178911  | C         | 3.88833   | -0.461339 | 0.493517  |
| H         | 4.279791  | -4.117183 | 0.872669  | H         | 5.331086  | -2.545421 | 1.479822  |
| H         | 6.06018   | -4.787991 | 2.480828  | H         | 7.034568  | -2.418275 | 3.293917  |
| C         | 3.333796  | -0.206405 | 0.064362  | C         | 3.130242  | 0.683989  | 0.230018  |
| C         | 4.165182  | 0.781659  | 0.685328  | C         | 3.488386  | 1.948139  | 0.802401  |
| C         | 2.824141  | -2.540993 | -0.570515 | C         | 3.589615  | -1.699723 | -0.235507 |
| C         | 3.439198  | -3.479582 | -1.454225 | C         | 4.603729  | -2.37405  | -0.981196 |
| C         | 1.427817  | -2.484958 | -0.493989 | C         | 2.271294  | -2.167721 | -0.287033 |
| C         | 4.842576  | -3.487828 | -1.69793  | C         | 5.932389  | -1.871134 | -1.088065 |
| C         | 2.63252   | -4.421719 | -2.141584 | C         | 4.282642  | -3.572606 | -1.667585 |
| C         | 0.6193    | -3.452165 | -1.174049 | C         | 1.955088  | -3.382007 | -0.974958 |
| C         | 5.405276  | -4.400036 | -2.555667 | C         | 6.885673  | -2.542336 | -1.812463 |
| H         | 5.470691  | -2.740192 | -1.187779 | H         | 6.180844  | -0.92537  | -0.580419 |
| C         | 3.241333  | -5.365806 | -3.01464  | C         | 5.292169  | -4.257267 | -2.400349 |
| C         | 1.225492  | -4.401109 | -1.966025 | C         | 2.953898  | -4.064761 | -1.633731 |
| C         | 4.598466  | -5.35673  | -3.216802 | C         | 6.566742  | -3.75452  | -2.470347 |
| H         | 6.489723  | -4.395148 | -2.741805 | H         | 7.908149  | -2.143767 | -1.892733 |
| H         | 2.598456  | -6.096517 | -3.528402 | H         | 5.024829  | -5.193306 | -2.913652 |
| H         | 0.617336  | -5.155237 | -2.490916 | H         | 2.72692   | -5.005167 | -2.161274 |
| H         | 5.072106  | -6.082319 | -3.894148 | H         | 7.349055  | -4.278901 | -3.038376 |
| O         | 0.789657  | -1.593615 | 0.343597  | O         | 1.267648  | -1.554694 | 0.434376  |
| O         | 2.306397  | 0.242503  | -0.742601 | O         | 2.089691  | 0.668492  | -0.678331 |
| P         | 0.747996  | 0.02521   | -0.132206 | P         | 0.671432  | -0.097768 | -0.169042 |

|   |           |           |           |   |           |           |           |
|---|-----------|-----------|-----------|---|-----------|-----------|-----------|
| O | -0.123637 | 0.23821   | -1.352676 | O | -0.158977 | -0.264568 | -1.408631 |
| O | 0.480918  | 0.793273  | 1.129769  | O | 0.056304  | 0.544173  | 1.05569   |
| H | -1.161372 | 1.280916  | 1.679018  | H | -1.950976 | -0.215708 | -0.906509 |
| N | -2.180923 | 1.388012  | 1.801179  | N | -2.930135 | -0.18752  | -0.584106 |
| C | -0.841546 | -3.451175 | -1.038008 | C | 0.590732  | -3.92168  | -1.004517 |
| C | -1.618929 | -2.518328 | -1.734812 | C | -0.347611 | -3.423444 | -1.919129 |
| C | -1.468374 | -4.402139 | -0.218355 | C | 0.237219  | -4.977273 | -0.152442 |
| C | -3.005189 | -2.509826 | -1.597882 | C | -1.618576 | -3.984991 | -2.001265 |
| H | -1.141984 | -1.756157 | -2.377811 | H | -0.09027  | -2.56393  | -2.563614 |
| C | -2.851291 | -4.411451 | -0.072957 | C | -1.034742 | -5.539004 | -0.209243 |
| H | -0.859415 | -5.139775 | 0.326624  | H | 0.969321  | -5.361248 | 0.575044  |
| C | -3.618234 | -3.453778 | -0.759331 | C | -1.960194 | -5.042046 | -1.141588 |
| C | 3.949611  | 2.205177  | 0.426469  | C | 2.838722  | 3.182598  | 0.362545  |
| C | 3.915235  | 3.121788  | 1.48794   | C | 2.425188  | 4.142576  | 1.297477  |
| C | 3.793926  | 2.665898  | -0.889754 | C | 2.659334  | 3.431182  | -1.007399 |
| C | 3.715262  | 4.477186  | 1.247493  | C | 1.840891  | 5.334454  | 0.879466  |
| H | 4.028708  | 2.762995  | 2.52302   | H | 2.543869  | 3.944277  | 2.374398  |
| C | 3.613298  | 4.02026   | -1.150483 | C | 2.087772  | 4.620884  | -1.443572 |
| H | 3.793631  | 1.938992  | -1.719995 | H | 2.960481  | 2.662836  | -1.739554 |
| C | 3.565658  | 4.923495  | -0.07607  | C | 1.676417  | 5.572076  | -0.494836 |
| H | -3.847679 | 2.51064   | 1.406027  | H | -4.645517 | 0.889353  | -0.31984  |
| C | -2.096225 | 3.730358  | 1.047148  | C | -3.447743 | 1.874971  | -1.844065 |
| C | -2.897187 | 4.879996  | 0.950399  | C | -4.504292 | 2.740596  | -2.170986 |
| C | -0.697427 | 3.863412  | 1.0339    | C | -2.285168 | 1.876087  | -2.633221 |
| C | -2.317525 | 6.143354  | 0.856351  | C | -4.411506 | 3.586353  | -3.274215 |
| H | -3.980677 | 4.782275  | 0.953822  | H | -5.401391 | 2.751295  | -1.556365 |
| C | -0.125489 | 5.131523  | 0.945267  | C | -2.199717 | 2.726955  | -3.734136 |
| H | -0.058585 | 2.987112  | 1.092229  | H | -1.453675 | 1.218348  | -2.397823 |
| C | -0.92733  | 6.272749  | 0.857551  | C | -3.256638 | 3.580944  | -4.059231 |
| H | -2.950334 | 7.02386   | 0.788333  | H | -5.239115 | 4.246142  | -3.519937 |
| H | 0.957953  | 5.230938  | 0.950021  | H | -1.299958 | 2.719853  | -4.342253 |
| H | -0.468224 | 7.25625   | 0.791178  | C | -3.333573 | -1.234994 | 0.29592   |
| C | -2.825349 | 0.216257  | 2.265078  | C | -4.556666 | -1.882376 | 0.097623  |
| C | -4.197284 | -0.016565 | 2.133409  | C | -2.494959 | -1.650322 | 1.344052  |
| C | -2.025045 | -0.746559 | 2.906226  | C | -4.947418 | -2.938327 | 0.921873  |
| C | -4.769481 | -1.18503  | 2.64374   | H | -5.192026 | -1.586766 | -0.733373 |
| H | -4.841556 | 0.683186  | 1.611226  | C | -2.879448 | -2.703903 | 2.163471  |
| C | -2.592281 | -1.902322 | 3.41386   | H | -1.54681  | -1.148017 | 1.506993  |
| H | -0.955389 | -0.582386 | 2.983221  | C | -4.101029 | -3.363161 | 1.956125  |
| C | -3.971995 | -2.135387 | 3.29047   | H | -5.891259 | -3.437617 | 0.731287  |
| H | -5.835026 | -1.343034 | 2.517612  | H | -2.236567 | -3.044656 | 2.968514  |

|                   |           |           |           |                   |           |           |           |
|-------------------|-----------|-----------|-----------|-------------------|-----------|-----------|-----------|
| H                 | -1.981069 | -2.650821 | 3.907256  | O                 | -1.469687 | 2.533976  | 1.344948  |
| O                 | -2.652905 | 0.339866  | -1.43337  | O                 | -3.49832  | 3.972525  | 0.717501  |
| O                 | -4.871243 | 1.550691  | -1.080846 | O                 | -3.837245 | 2.369178  | 2.493902  |
| O                 | -3.026417 | 2.781984  | -2.317387 | C                 | -2.551288 | 4.838881  | 0.106259  |
| C                 | -5.405272 | 0.778475  | -2.156092 | C                 | -2.299972 | 6.029942  | 1.004031  |
| C                 | -6.335556 | 1.637869  | -2.98137  | H                 | -3.021301 | 5.174938  | -0.86196  |
| H                 | -5.967933 | -0.07722  | -1.683466 | H                 | -1.597192 | 4.287162  | -0.104178 |
| H                 | -4.567726 | 0.368758  | -2.780842 | H                 | -1.617381 | 6.748814  | 0.487791  |
| H                 | -6.829683 | 1.004575  | -3.75625  | H                 | -3.261624 | 6.543801  | 1.242041  |
| H                 | -7.119077 | 2.095582  | -2.33162  | H                 | -1.827546 | 5.709036  | 1.962989  |
| H                 | -5.773094 | 2.459506  | -3.486236 | C                 | -4.131371 | 1.062503  | 2.958244  |
| C                 | -1.635034 | 3.064848  | -2.455939 | C                 | -5.63068  | 0.856675  | 2.996971  |
| C                 | -1.458979 | 3.94938   | -3.665471 | H                 | -3.710695 | 0.994682  | 4.002357  |
| H                 | -1.078273 | 2.092381  | -2.569549 | H                 | -3.631084 | 0.290244  | 2.313058  |
| H                 | -1.291473 | 3.580558  | -1.51707  | H                 | -5.860631 | -0.088178 | 3.544416  |
| H                 | -0.376865 | 4.192377  | -3.789131 | H                 | -6.11939  | 1.712218  | 3.522587  |
| H                 | -1.824771 | 3.428376  | -4.582298 | H                 | -6.056904 | 0.789421  | 1.967956  |
| H                 | -2.037453 | 4.89612   | -3.545247 | H                 | -0.871562 | 1.696654  | 1.165779  |
| H                 | -1.617376 | 0.25613   | -1.344843 | H                 | -3.180212 | 4.239799  | -4.920255 |
| O                 | -4.427339 | -3.305448 | 3.81797   | O                 | -4.370626 | -4.39689  | 2.798728  |
| C                 | -5.787188 | -3.657968 | 3.599211  | C                 | -5.441001 | -5.273645 | 2.466237  |
| H                 | -6.014991 | -3.730325 | 2.525481  | H                 | -5.304566 | -5.702115 | 1.462812  |
| H                 | -5.918178 | -4.636599 | 4.064135  | H                 | -5.411661 | -6.071609 | 3.210059  |
| H                 | -6.471206 | -2.940241 | 4.07124   | H                 | -6.413384 | -4.766876 | 2.52176   |
| H                 | -3.601746 | -1.739583 | -2.12028  | H                 | -1.313546 | -6.361984 | 0.47      |
| H                 | -3.339793 | -5.153414 | 0.580359  | H                 | -2.349499 | -3.60024  | -2.73232  |
| H                 | 3.504413  | 4.379561  | -2.187832 | H                 | 1.957816  | 4.815631  | -2.521381 |
| H                 | 3.67193   | 5.193121  | 2.085429  | H                 | 1.504025  | 6.080528  | 1.618949  |
| N                 | -5.088558 | -3.419524 | -0.575189 | N                 | -3.322813 | -5.62479  | -1.206285 |
| O                 | -5.600844 | -4.166926 | 0.218992  | O                 | -4.058708 | -5.301482 | -2.101339 |
| O                 | -5.744805 | -2.634409 | -1.208644 | O                 | -3.674046 | -6.39853  | -0.352729 |
| N                 | 3.342092  | 6.366541  | -0.340834 | N                 | 1.046511  | 6.834723  | -0.952856 |
| O                 | 3.437554  | 6.780185  | -1.465109 | O                 | 0.970999  | 7.057661  | -2.132799 |
| O                 | 3.052687  | 7.087865  | 0.578765  | O                 | 0.612255  | 7.604088  | -0.135749 |
| <i>(R)</i> -TS4-4 |           |           |           | <i>(S)</i> -TS4-4 |           |           |           |
| C                 | 0.545147  | -3.649607 | 1.099816  | C                 | -0.251746 | -3.661138 | 0.711743  |
| P                 | 1.498797  | -3.340339 | -1.091146 | P                 | 1.602558  | -3.461783 | -0.751129 |
| C                 | -3.771827 | 6.509617  | 2.382714  | C                 | 1.448851  | 6.813359  | -3.527302 |
| C                 | -4.358327 | 5.272187  | 2.293889  | C                 | 2.372582  | 5.875841  | -3.139156 |
| C                 | -3.762338 | 4.243261  | 1.512725  | C                 | 2.051127  | 4.912201  | -2.142878 |

|   |           |           |           |   |           |           |           |
|---|-----------|-----------|-----------|---|-----------|-----------|-----------|
| C | -2.558248 | 4.505125  | 0.810866  | C | 0.772014  | 4.936065  | -1.531797 |
| C | -1.974111 | 5.798729  | 0.925604  | C | -0.166428 | 5.91671   | -1.963011 |
| C | -2.564033 | 6.772444  | 1.692765  | C | 0.162959  | 6.827832  | -2.935611 |
| H | -5.33292  | 2.798506  | 1.913089  | H | 4.001086  | 3.9614    | -2.198884 |
| H | -4.227338 | 7.306188  | 2.989174  | H | 1.691937  | 7.556719  | -4.300644 |
| H | -5.295309 | 5.05147   | 2.827224  | H | 3.374142  | 5.847125  | -3.59433  |
| C | -4.362054 | 2.962494  | 1.417908  | C | 2.992826  | 3.926839  | -1.754953 |
| C | -1.95499  | 3.463894  | 0.043141  | C | 0.453718  | 3.96412   | -0.535719 |
| H | -1.033331 | 5.999961  | 0.388561  | H | -1.167886 | 5.923983  | -1.503812 |
| H | -2.102893 | 7.767491  | 1.782522  | H | -0.570288 | 7.577492  | -3.268858 |
| C | -2.491977 | 2.173716  | 0.091707  | C | 1.351956  | 2.9215    | -0.281507 |
| C | -3.763369 | 1.94154   | 0.709995  | C | 2.670986  | 2.945304  | -0.840787 |
| C | -0.73215  | 3.701965  | -0.731349 | C | -0.831003 | 3.992375  | 0.172587  |
| C | -0.706211 | 4.659775  | -1.78983  | C | -1.223927 | 5.131418  | 0.938104  |
| C | 0.394939  | 2.909679  | -0.491855 | C | -1.633148 | 2.845366  | 0.179698  |
| C | -1.862123 | 5.396509  | -2.176056 | C | -0.388799 | 6.276299  | 1.085237  |
| C | 0.49684   | 4.86639   | -2.511634 | C | -2.475956 | 5.123527  | 1.60383   |
| C | 1.632638  | 3.193695  | -1.15234  | C | -2.895424 | 2.844271  | 0.85166   |
| C | -1.813065 | 6.291418  | -3.215923 | C | -0.79592  | 7.356429  | 1.82778   |
| H | -2.801575 | 5.228736  | -1.625593 | H | 0.597338  | 6.276361  | 0.593888  |
| C | 0.523648  | 5.805209  | -3.580157 | C | -2.881462 | 6.26162   | 2.355827  |
| C | 1.660419  | 4.139514  | -2.154186 | C | -3.299466 | 3.972498  | 1.532218  |
| C | -0.606504 | 6.502909  | -3.92517  | C | -2.060434 | 7.355294  | 2.464434  |
| H | -2.712427 | 6.851887  | -3.512196 | H | -0.142269 | 8.234533  | 1.939534  |
| H | 1.468288  | 5.954675  | -4.124662 | H | -3.863423 | 6.240315  | 2.852276  |
| H | 2.600611  | 4.351866  | -2.688259 | H | -4.272738 | 3.988869  | 2.048796  |
| H | -0.590601 | 7.22676   | -4.753111 | H | -2.368468 | 8.235557  | 3.047489  |
| O | 0.39001   | 1.921097  | 0.470228  | O | -1.288091 | 1.734794  | -0.564302 |
| O | -1.896312 | 1.118099  | -0.565721 | O | 1.051362  | 1.908113  | 0.608011  |
| P | -0.463059 | 0.505063  | 0.099148  | P | -0.073806 | 0.757462  | 0.080694  |
| O | 0.137995  | -0.25235  | -1.060516 | O | -0.522777 | 0.020367  | 1.308548  |
| O | -0.663454 | -0.178118 | 1.421801  | O | 0.419723  | -0.026513 | -1.116202 |
| H | 0.183454  | -1.736631 | 1.73021   | H | -1.021379 | -1.753902 | 0.772273  |
| N | 0.820497  | -2.548162 | 1.810815  | N | -1.171761 | -2.712109 | 0.426707  |
| C | 2.884641  | 2.555406  | -0.741369 | C | -3.774561 | 1.670006  | 0.853913  |
| C | 3.639744  | 1.806089  | -1.653112 | C | -3.586284 | 0.650754  | 1.797899  |
| C | 3.372682  | 2.767789  | 0.555176  | C | -4.847591 | 1.596777  | -0.042266 |
| C | 4.884105  | 1.302309  | -1.270964 | C | -4.500663 | -0.403225 | 1.868337  |
| H | 3.247277  | 1.609794  | -2.665447 | H | -2.710775 | 0.670236  | 2.474068  |
| C | 4.630113  | 2.277329  | 0.913958  | C | -5.742232 | 0.526294  | 0.030543  |
| H | 2.760443  | 3.320062  | 1.288329  | H | -4.986119 | 2.379882  | -0.806359 |

|   |           |           |           |   |           |           |           |
|---|-----------|-----------|-----------|---|-----------|-----------|-----------|
| C | 5.39234   | 1.539951  | 0.007877  | C | -5.582847 | -0.473992 | 0.990034  |
| H | 6.382259  | 1.147004  | 0.29351   | H | -6.302635 | -1.307514 | 1.051997  |
| C | -4.473027 | 0.674463  | 0.540838  | C | 3.695308  | 1.983806  | -0.434111 |
| C | -5.123868 | 0.075098  | 1.62765   | C | 4.553749  | 1.427428  | -1.393488 |
| C | -4.570452 | 0.089039  | -0.731111 | C | 3.867932  | 1.655239  | 0.918654  |
| C | -5.885033 | -1.078767 | 1.432603  | C | 5.586693  | 0.577293  | -0.996161 |
| H | -5.034195 | 0.513789  | 2.635926  | H | 4.405909  | 1.651014  | -2.463678 |
| C | -5.350783 | -1.054172 | -0.912486 | C | 4.904444  | 0.801345  | 1.299476  |
| H | -4.018385 | 0.531891  | -1.580334 | H | 3.172065  | 2.063937  | 1.673907  |
| C | -6.016922 | -1.643495 | 0.163006  | C | 5.772099  | 0.259116  | 0.349744  |
| H | -6.641032 | -2.540606 | 0.014441  | H | 6.58493   | -0.420465 | 0.655585  |
| H | 1.237968  | -4.471957 | 1.252456  | H | -0.511536 | -4.639023 | 0.313459  |
| C | -0.847179 | -4.084824 | 0.845434  | C | 0.433632  | -3.706551 | 2.029359  |
| C | -1.04171  | -5.400705 | 0.392385  | C | 0.840839  | -4.96161  | 2.510302  |
| C | -1.963644 | -3.274554 | 1.104967  | C | 0.65126   | -2.561955 | 2.814224  |
| C | -2.325412 | -5.906396 | 0.2098    | C | 1.43904   | -5.079482 | 3.762954  |
| H | -0.178498 | -6.03019  | 0.186196  | H | 0.682791  | -5.84915  | 1.901912  |
| C | -3.24632  | -3.791818 | 0.930049  | C | 1.255747  | -2.687861 | 4.064052  |
| H | -1.83839  | -2.250637 | 1.441777  | H | 0.345852  | -1.581653 | 2.460652  |
| C | -3.433526 | -5.102441 | 0.485554  | C | 1.647535  | -3.940433 | 4.543406  |
| H | -2.460325 | -6.927181 | -0.136733 | H | 1.73985   | -6.057529 | 4.127856  |
| H | -4.10884  | -3.167127 | 1.15484   | H | 1.417825  | -1.798998 | 4.66723   |
| H | -4.438117 | -5.496495 | 0.357467  | C | -2.124994 | -2.887716 | -0.618996 |
| C | 2.060369  | -2.252583 | 2.425561  | C | -2.984006 | -3.990911 | -0.60129  |
| C | 3.156112  | -3.11998  | 2.410696  | C | -2.227055 | -1.952988 | -1.663252 |
| C | 2.161706  | -1.030537 | 3.11485   | C | -3.928216 | -4.180206 | -1.611739 |
| C | 4.327976  | -2.792423 | 3.097013  | H | -2.940859 | -4.691942 | 0.228447  |
| H | 3.132678  | -4.052938 | 1.857805  | C | -3.176207 | -2.130761 | -2.661411 |
| C | 3.323846  | -0.705235 | 3.792861  | H | -1.552625 | -1.103669 | -1.695442 |
| H | 1.321655  | -0.343592 | 3.101921  | C | -4.030408 | -3.244248 | -2.649258 |
| C | 4.416519  | -1.58752  | 3.801383  | H | -4.585225 | -5.041102 | -1.566209 |
| H | 5.160898  | -3.485378 | 3.066844  | H | -3.268374 | -1.415745 | -3.472705 |
| H | 3.415565  | 0.241008  | 4.319299  | O | 2.048174  | -1.971571 | -1.076244 |
| O | 2.098539  | -1.878936 | -1.343155 | O | 2.912645  | -4.213238 | -0.135316 |
| O | 2.787222  | -4.337713 | -1.038182 | O | 1.573125  | -4.324183 | -2.159222 |
| O | 0.798511  | -3.856753 | -2.501875 | C | 3.987395  | -3.415223 | 0.360709  |
| C | 3.681712  | -4.311484 | -2.15825  | C | 5.214648  | -3.661508 | -0.501657 |
| C | 3.665183  | -5.68066  | -2.81698  | H | 3.698839  | -2.326929 | 0.318214  |
| H | 3.326878  | -3.526117 | -2.884106 | H | 6.091793  | -3.131067 | -0.059176 |
| H | 4.400457  | -5.697237 | -3.655847 | H | 5.433645  | -4.753958 | -0.558171 |
| H | 3.938366  | -6.468981 | -2.076355 | H | 5.055507  | -3.276089 | -1.537086 |

|                   |           |           |           |                   |           |           |           |
|-------------------|-----------|-----------|-----------|-------------------|-----------|-----------|-----------|
| H                 | 2.648525  | -5.905502 | -3.219393 | C                 | 0.373125  | -4.1945   | -2.917435 |
| C                 | -0.231731 | -3.002405 | -3.006319 | C                 | -0.202416 | -5.587626 | -3.119316 |
| C                 | -1.537437 | -3.779898 | -3.022618 | H                 | -0.364025 | -3.549479 | -2.355215 |
| H                 | -0.322972 | -2.086679 | -2.352302 | H                 | -1.091591 | -5.531062 | -3.790204 |
| H                 | -2.362398 | -3.106393 | -3.35972  | H                 | 0.565793  | -6.251521 | -3.583242 |
| H                 | -1.462223 | -4.646378 | -3.721506 | H                 | -0.508807 | -6.033085 | -2.143616 |
| H                 | -1.781869 | -4.170456 | -2.005089 | H                 | 1.339831  | -1.208932 | -1.042349 |
| H                 | 1.392825  | -1.150287 | -1.174254 | C                 | -6.923326 | 0.466268  | -0.929986 |
| C                 | 5.182223  | 2.592945  | 2.298667  | C                 | -4.309624 | -1.481734 | 2.927481  |
| C                 | 5.726688  | 0.494516  | -2.250267 | C                 | 6.540097  | -0.004409 | -2.033062 |
| C                 | -6.579179 | -1.747304 | 2.612864  | C                 | 5.113885  | 0.468569  | 2.771369  |
| C                 | -5.496307 | -1.647995 | -2.308936 | F                 | -7.386558 | -0.801623 | -1.187628 |
| F                 | 6.273611  | 1.846314  | 2.669521  | F                 | -6.676241 | 0.994781  | -2.173095 |
| F                 | 4.28478   | 2.415698  | 3.323648  | F                 | -8.036275 | 1.144612  | -0.492876 |
| F                 | 5.602664  | 3.893551  | 2.447162  | F                 | -3.982696 | -1.002017 | 4.171815  |
| F                 | 6.902871  | 1.109518  | -2.612049 | F                 | -5.414212 | -2.26903  | 3.151628  |
| F                 | 6.130133  | -0.728639 | -1.770606 | F                 | -3.31491  | -2.386496 | 2.643605  |
| F                 | 5.118987  | 0.208416  | -3.446674 | F                 | 6.889586  | -1.314315 | -1.808712 |
| F                 | -6.737094 | -0.949466 | 3.718499  | F                 | 7.745826  | 0.652299  | -2.112396 |
| F                 | -5.919426 | -2.85717  | 3.086695  | F                 | 6.069425  | 0.006359  | -3.322434 |
| F                 | -7.845807 | -2.204546 | 2.340503  | F                 | 6.021843  | 1.28025   | 3.40811   |
| F                 | -6.402216 | -0.990218 | -3.105378 | F                 | 5.585255  | -0.802577 | 3.00377   |
| F                 | -5.917969 | -2.956106 | -2.332763 | F                 | 3.985415  | 0.552351  | 3.54884   |
| F                 | -4.339295 | -1.655639 | -3.048316 | H                 | 2.113133  | -4.0284   | 5.521418  |
| O                 | 5.505885  | -1.177763 | 4.510405  | O                 | -4.91657  | -3.323977 | -3.680815 |
| C                 | 6.644359  | -2.023247 | 4.542311  | C                 | -5.842624 | -4.399777 | -3.693088 |
| H                 | 7.057498  | -2.182708 | 3.537382  | H                 | -6.485055 | -4.38863  | -2.802803 |
| H                 | 7.383185  | -1.506258 | 5.157267  | H                 | -6.457149 | -4.253896 | -4.583075 |
| H                 | 6.411915  | -2.996391 | 4.995277  | H                 | -5.333384 | -5.370557 | -3.759512 |
| C                 | 5.069835  | -3.967605 | -1.647676 | C                 | 0.703852  | -3.549927 | -4.253937 |
| H                 | 5.360168  | -4.658927 | -0.821676 | H                 | 1.496232  | -4.139137 | -4.774121 |
| H                 | 5.805998  | -4.064831 | -2.480518 | H                 | -0.211127 | -3.521674 | -4.891284 |
| H                 | 5.096957  | -2.918627 | -1.264984 | H                 | 1.077901  | -2.508536 | -4.106813 |
| C                 | 0.155162  | -2.579205 | -4.41466  | C                 | 4.251811  | -3.831327 | 1.798291  |
| H                 | 1.088822  | -1.96848  | -4.392143 | H                 | 4.649864  | -4.87291  | 1.833259  |
| H                 | 0.330654  | -3.476134 | -5.054473 | H                 | 5.000785  | -3.135659 | 2.248634  |
| H                 | -0.668086 | -1.968525 | -4.854938 | H                 | 3.310816  | -3.793237 | 2.400807  |
| <i>(R)</i> -TS4-5 |           |           |           | <i>(S)</i> -TS4-5 |           |           |           |
| C                 | -0.475636 | -3.583983 | -1.155351 | C                 | 0.480856  | -3.419133 | 1.109011  |
| P                 | -1.295692 | -3.309566 | 1.245735  | P                 | 2.361285  | -2.94941  | -0.627233 |

|   |           |           |           |   |           |           |           |
|---|-----------|-----------|-----------|---|-----------|-----------|-----------|
| C | 3.820978  | 6.187333  | -3.175199 | C | 0.37642   | 6.686541  | -3.942248 |
| C | 4.41046   | 4.980961  | -2.891596 | C | 1.417784  | 5.911555  | -3.49718  |
| C | 3.81959   | 4.089632  | -1.953209 | C | 1.22977   | 4.990816  | -2.428963 |
| C | 2.619965  | 4.461128  | -1.294432 | C | -0.04058  | 4.888957  | -1.807413 |
| C | 2.031842  | 5.718065  | -1.613499 | C | -1.101935 | 5.702176  | -2.297445 |
| C | 2.615453  | 6.555908  | -2.531256 | C | -0.898666 | 6.574476  | -3.337893 |
| H | 5.388247  | 2.599292  | -2.12938  | H | 3.292009  | 4.311595  | -2.430468 |
| H | 4.2724    | 6.876819  | -3.903734 | H | 0.516695  | 7.395639  | -4.771272 |
| H | 5.345507  | 4.678833  | -3.387083 | H | 2.41324   | 5.982223  | -3.961098 |
| C | 4.418604  | 2.838006  | -1.663107 | C | 2.296709  | 4.174151  | -1.977479 |
| C | 2.024142  | 3.558364  | -0.362611 | C | -0.22628  | 3.957037  | -0.74188  |
| H | 1.092908  | 6.00113   | -1.111129 | H | -2.094406 | 5.610211  | -1.827991 |
| H | 2.151025  | 7.522319  | -2.778728 | H | -1.725841 | 7.19355   | -3.716366 |
| C | 2.553676  | 2.271653  | -0.22272  | C | 0.802699  | 3.06313   | -0.425422 |
| C | 3.818466  | 1.93781   | -0.807931 | C | 2.109086  | 3.230176  | -0.989944 |
| C | 0.827629  | 3.927283  | 0.402248  | C | -1.500469 | 3.863822  | -0.02052  |
| C | 0.841361  | 5.053042  | 1.280522  | C | -2.037361 | 4.991552  | 0.670821  |
| C | -0.303883 | 3.105623  | 0.351517  | C | -2.141053 | 2.623192  | 0.07747   |
| C | 2.006922  | 5.845921  | 1.485315  | C | -1.364155 | 6.24618   | 0.72195   |
| C | -0.332007 | 5.384057  | 2.004407  | C | -3.270955 | 4.863476  | 1.358375  |
| C | -1.497795 | 3.468488  | 1.049904  | C | -3.38268  | 2.500499  | 0.777332  |
| C | 1.990821  | 6.915823  | 2.345096  | C | -1.908001 | 7.312635  | 1.39332   |
| H | 2.92835   | 5.579769  | 0.943413  | H | -0.391299 | 6.343906  | 0.214118  |
| C | -0.326586 | 6.504759  | 2.88113   | C | -3.821123 | 5.988036  | 2.034965  |
| C | -1.494856 | 4.587847  | 1.853902  | C | -3.930081 | 3.609279  | 1.385091  |
| C | 0.809659  | 7.255567  | 3.04744   | C | -3.15542  | 7.187447  | 2.051005  |
| H | 2.897598  | 7.51932   | 2.50123   | H | -1.378751 | 8.276668  | 1.430611  |
| H | -1.250982 | 6.749921  | 3.425822  | H | -4.787149 | 5.870736  | 2.548964  |
| H | -2.406006 | 4.878326  | 2.401668  | H | -4.890441 | 3.5307    | 1.919751  |
| H | 0.819228  | 8.12027   | 3.727093  | H | -3.575483 | 8.058269  | 2.575333  |
| O | -0.34905  | 2.000508  | -0.473844 | O | -1.663973 | 1.521934  | -0.603419 |
| O | 1.956047  | 1.327112  | 0.587787  | O | 0.636264  | 2.075201  | 0.52658   |
| P | 0.517633  | 0.643253  | 0.022443  | P | -0.315513 | 0.752259  | 0.056534  |
| O | -0.072323 | 0.007286  | 1.258604  | O | -0.664727 | 0.039143  | 1.3406    |
| O | 0.705976  | -0.170715 | -1.229432 | O | 0.276636  | -0.03208  | -1.081929 |
| H | -0.148403 | -1.578578 | -1.593928 | H | -0.682805 | -1.703119 | 1.039722  |
| N | -0.78241  | -2.399526 | -1.711174 | N | -0.55938  | -2.682737 | 0.704585  |
| C | -2.74387  | 2.705735  | 0.916377  | C | -4.085439 | 1.21776   | 0.884754  |
| C | -2.996029 | 1.583076  | 1.718149  | C | -3.724986 | 0.301362  | 1.88241   |
| C | -3.724715 | 3.158901  | 0.026229  | C | -5.15093  | 0.924049  | 0.025771  |
| C | -4.250892 | 0.973035  | 1.668896  | C | -4.45829  | -0.877797 | 2.037235  |
| H | -2.203324 | 1.174838  | 2.374406  | H | -2.851331 | 0.498053  | 2.531791  |
| C | -4.961882 | 2.512756  | -0.037412 | C | -5.862218 | -0.268376 | 0.182831  |
| H | -3.527243 | 4.029536  | -0.620628 | H | -5.429802 | 1.631528  | -0.773116 |
| C | -5.238668 | 1.426105  | 0.790657  | C | -5.532956 | -1.16996  | 1.196035  |

|   |           |           |           |   |           |           |           |
|---|-----------|-----------|-----------|---|-----------|-----------|-----------|
| H | -6.223514 | 0.930532  | 0.761421  | H | -6.115284 | -2.097599 | 1.329715  |
| C | 4.509493  | 0.696226  | -0.463627 | C | 3.253747  | 2.459657  | -0.505506 |
| C | 5.180491  | -0.038228 | -1.449216 | C | 4.182161  | 1.928223  | -1.41215  |
| C | 4.555708  | 0.260354  | 0.871287  | C | 3.463327  | 2.297542  | 0.871831  |
| C | 5.904279  | -1.181473 | -1.098591 | C | 5.314387  | 1.262322  | -0.939791 |
| H | 5.135738  | 0.277104  | -2.505011 | H | 4.010807  | 2.021497  | -2.498032 |
| C | 5.287194  | -0.878898 | 1.205133  | C | 4.601501  | 1.6304    | 1.328104  |
| H | 3.998185  | 0.817909  | 1.647309  | H | 2.716681  | 2.686055  | 1.587693  |
| C | 5.973073  | -1.60442  | 0.227738  | C | 5.532794  | 1.106784  | 0.429665  |
| H | 6.553673  | -2.50001  | 0.505822  | H | 6.421079  | 0.563632  | 0.794764  |
| H | -1.234045 | -4.34719  | -1.282729 | H | 0.496899  | -4.426743 | 0.715294  |
| C | 0.906762  | -4.03124  | -0.993532 | C | 1.19005   | -3.164963 | 2.357972  |
| C | 1.120694  | -5.363027 | -0.60192  | C | 2.015354  | -4.189013 | 2.856634  |
| C | 2.039215  | -3.242095 | -1.272352 | C | 1.08714   | -1.979272 | 3.114565  |
| C | 2.383353  | -5.923028 | -0.496542 | C | 2.70445   | -4.079736 | 4.054203  |
| C | 3.314448  | -3.790936 | -1.177863 | C | 1.774296  | -1.855012 | 4.317634  |
| H | 1.915586  | -2.202077 | -1.556319 | H | 0.479445  | -1.156104 | 2.750114  |
| C | 3.488438  | -5.125507 | -0.795904 | C | 2.577532  | -2.899782 | 4.788707  |
| H | 2.482251  | -6.958666 | -0.189666 | H | 3.322132  | -4.906287 | 4.388565  |
| H | 4.180888  | -3.177004 | -1.412993 | H | 1.688873  | -0.935197 | 4.887772  |
| H | 4.486935  | -5.547995 | -0.728787 | O | 2.438186  | -1.459751 | -1.222496 |
| C | -2.083705 | -2.126179 | -2.118962 | O | 3.928034  | -3.209904 | -0.14473  |
| O | -1.871543 | -1.826333 | 1.439026  | O | 2.309446  | -4.00804  | -1.876629 |
| O | -2.558118 | -4.284581 | 1.549767  | C | 4.306082  | -2.280507 | 0.859797  |
| O | -0.31351  | -3.654947 | 2.536404  | C | 5.776718  | -2.468261 | 1.146691  |
| C | -3.380216 | -3.980047 | 2.673211  | H | 3.679428  | -2.481094 | 1.772288  |
| C | -3.212496 | -5.031519 | 3.747009  | H | 4.096934  | -1.238092 | 0.492558  |
| H | -4.437596 | -3.982231 | 2.282362  | H | 6.075386  | -1.790631 | 1.9834    |
| H | -3.138603 | -2.951815 | 3.056582  | H | 5.98881   | -3.525762 | 1.431394  |
| H | -3.952821 | -4.845774 | 4.561205  | H | 6.380416  | -2.218518 | 0.239867  |
| H | -3.383977 | -6.049563 | 3.323067  | C | 3.224221  | -3.7873   | -2.945447 |
| H | -2.183165 | -4.999566 | 4.178683  | C | 2.460809  | -3.498291 | -4.219251 |
| C | 0.857874  | -2.847111 | 2.49318   | H | 3.816113  | -4.739458 | -3.054586 |
| C | 1.764806  | -3.277252 | 3.620196  | H | 3.916774  | -2.943551 | -2.686085 |
| H | 0.552784  | -1.768882 | 2.595309  | H | 3.168416  | -3.494532 | -5.082009 |
| H | 1.35263   | -2.999019 | 1.493906  | H | 1.682392  | -4.280796 | -4.387811 |
| H | 2.71956   | -2.697517 | 3.568126  | H | 1.954799  | -2.5049   | -4.162169 |
| H | 1.27408   | -3.087174 | 4.604315  | H | 1.574269  | -0.917937 | -1.163158 |
| H | 1.992427  | -4.367145 | 3.546343  | C | -6.997765 | -0.596421 | -0.778591 |
| H | -1.180328 | -1.077085 | 1.316593  | C | -4.058537 | -1.853273 | 3.137312  |
| C | -6.008749 | 3.02054   | -1.019563 | C | 6.33966   | 0.709302  | -1.922923 |
| C | -4.590754 | -0.187508 | 2.597669  | C | 4.845534  | 1.494388  | 2.825376  |
| C | 6.628027  | -1.957405 | -2.191847 | F | -7.967532 | -1.419993 | -0.261471 |
| C | 5.364356  | -1.347433 | 2.654082  | F | -6.590097 | -1.240063 | -1.924275 |
| F | -7.274811 | 2.524554  | -0.827622 | F | -7.69067  | 0.496425  | -1.238127 |



|   |           |           |           |   |           |           |           |
|---|-----------|-----------|-----------|---|-----------|-----------|-----------|
| F | -5.733812 | 2.729161  | -2.335697 | F | -3.853129 | -1.27082  | 4.363776  |
| F | -6.176151 | 4.384342  | -1.012371 | F | -4.970018 | -2.850332 | 3.386166  |
| F | -3.597474 | -0.556638 | 3.466812  | F | -2.887166 | -2.530481 | 2.889081  |
| F | -5.669431 | 0.066136  | 3.416124  | F | 6.923281  | -0.471357 | -1.531268 |
| F | -4.941667 | -1.348543 | 1.953229  | F | 7.406413  | 1.5491    | -2.144204 |
| F | 5.821686  | -2.315495 | -3.246777 | F | 5.854041  | 0.450254  | -3.180052 |
| F | 7.185758  | -3.144965 | -1.784318 | F | 5.505924  | 2.559423  | 3.388519  |
| F | 7.666323  | -1.276103 | -2.777099 | F | 5.604534  | 0.405009  | 3.184451  |
| F | 4.410495  | -0.818733 | 3.486353  | F | 3.70694   | 1.367552  | 3.583618  |
| F | 6.556291  | -1.057495 | 3.273025  | H | 3.111753  | -2.795976 | 5.728855  |
| F | 5.228738  | -2.707187 | 2.809764  | C | -1.289767 | -3.065316 | -0.420691 |
| N | -3.020987 | -3.017528 | -2.140821 | S | -2.684817 | -2.116067 | -0.938886 |
| S | -2.505456 | -0.492684 | -2.654545 | N | -1.001693 | -4.118007 | -1.114677 |
| C | -4.136656 | -1.092625 | -2.941222 | C | -2.90627  | -3.281329 | -2.236289 |
| C | -5.248543 | -0.397903 | -3.418082 | C | -1.895946 | -4.26919  | -2.161839 |
| C | -4.20517  | -2.464679 | -2.601916 | C | -3.889497 | -3.304914 | -3.225909 |
| C | -6.438774 | -1.107797 | -3.552042 | C | -1.836676 | -5.307118 | -3.114043 |
| H | -5.196273 | 0.660054  | -3.662251 | C | -3.83202  | -4.339263 | -4.155778 |
| C | -5.414088 | -3.176979 | -2.736403 | H | -4.671267 | -2.550692 | -3.265828 |
| C | -6.515013 | -2.469735 | -3.217032 | C | -2.821456 | -5.314503 | -4.100508 |
| H | -7.325193 | -0.597014 | -3.918141 | H | -4.581287 | -4.391732 | -4.940876 |
| H | -7.462548 | -2.990271 | -3.331904 | H | -2.805214 | -6.101258 | -4.850626 |
| C | -5.484734 | -4.635759 | -2.366553 | C | -0.742601 | -6.340049 | -3.044452 |
| H | -4.806473 | -5.235303 | -2.985335 | H | 0.244248  | -5.863619 | -3.021414 |
| H | -5.180574 | -4.794685 | -1.325517 | H | -0.821245 | -6.93942  | -2.129167 |
| H | -6.499659 | -5.023755 | -2.495306 | H | -0.788329 | -7.018676 | -3.901764 |
| F | 0.042998  | -6.118441 | -0.306687 | F | 2.142763  | -5.319597 | 2.133441  |

(R)-2-component-int1

|   |           |          |          |
|---|-----------|----------|----------|
| C | -2.023714 | 5.824729 | 3.416283 |
| C | -2.878901 | 4.800009 | 3.097058 |
| C | -2.553832 | 3.882749 | 2.059094 |
| C | -1.347327 | 4.044995 | 1.331989 |
| C | -0.47606  | 5.110422 | 1.69724  |
| C | -0.805264 | 5.974773 | 2.712073 |
| H | -4.368318 | 2.714088 | 2.304648 |
| H | -2.269862 | 6.533691 | 4.220696 |
| H | -3.826747 | 4.66509  | 3.640066 |
| C | -3.418191 | 2.80183  | 1.752599 |
| C | -1.027254 | 3.123533 | 0.287313 |
| H | 0.475014  | 5.22554  | 1.15297  |
| H | -0.123164 | 6.792055 | 2.991375 |
| C | -1.851388 | 2.01256  | 0.082368 |
| C | -3.090369 | 1.873537 | 0.787742 |
| C | 0.203794  | 3.275472 | -0.49829 |

(S)- 2-component-int1

|   |           |          |           |
|---|-----------|----------|-----------|
| C | -2.022485 | 5.824962 | 3.416487  |
| C | -2.877921 | 4.800519 | 3.097043  |
| C | -2.552982 | 3.88328  | 2.059018  |
| C | -1.346344 | 4.045274 | 1.332077  |
| C | -0.474821 | 5.110414 | 1.697554  |
| C | -0.803906 | 5.974742 | 2.712445  |
| H | -4.36781  | 2.715083 | 2.304248  |
| H | -2.268532 | 6.533903 | 4.220951  |
| H | -3.825872 | 4.665805 | 3.639919  |
| C | -3.417598 | 2.802625 | 1.752315  |
| C | -1.026407 | 3.123844 | 0.287332  |
| H | 0.47635   | 5.225325 | 1.15341   |
| H | -0.121611 | 6.791803 | 2.991921  |
| C | -1.850824 | 2.013121 | 0.082174  |
| C | -3.089911 | 1.874334 | 0.787409  |
| C | 0.204748  | 3.275534 | -0.498153 |

|   |           |           |           |   |           |           |           |
|---|-----------|-----------|-----------|---|-----------|-----------|-----------|
| C | 0.469383  | 4.454796  | -1.258152 | C | 0.470721  | 4.454885  | -1.257842 |
| C | 1.097418  | 2.202254  | -0.572759 | C | 1.098066  | 2.202067  | -0.572719 |
| C | -0.466425 | 5.523677  | -1.353272 | C | -0.464765 | 5.524057  | -1.352859 |
| C | 1.690434  | 4.559689  | -1.972453 | C | 1.691834  | 4.559516  | -1.972074 |
| C | 2.345209  | 2.323512  | -1.260992 | C | 2.345892  | 2.323027  | -1.260941 |
| C | -0.187053 | 6.640058  | -2.10202  | C | -0.18502  | 6.640466  | -2.101426 |
| H | -1.424907 | 5.433978  | -0.817309 | H | -1.423306 | 5.434563  | -0.816969 |
| C | 1.961204  | 5.733093  | -2.730194 | C | 1.962997  | 5.732954  | -2.729623 |
| C | 2.62255   | 3.490458  | -1.937645 | C | 2.623613  | 3.489986  | -1.937413 |
| C | 1.043072  | 6.751203  | -2.79332  | C | 1.045175  | 6.75135   | -2.792642 |
| H | -0.918255 | 7.45921   | -2.176215 | H | -0.915975 | 7.459846  | -2.175539 |
| H | 2.918459  | 5.801238  | -3.269289 | H | 2.920299  | 5.80089   | -3.268661 |
| H | 3.577345  | 3.605547  | -2.475967 | H | 3.578448  | 3.604851  | -2.475712 |
| H | 1.247465  | 7.657527  | -3.382537 | H | 1.249871  | 7.657702  | -3.381709 |
| O | 0.845119  | 1.031582  | 0.124281  | O | 0.84544   | 1.031391  | 0.124194  |
| O | -1.582631 | 1.0671    | -0.891953 | O | -1.582202 | 1.067716  | -0.892239 |
| P | -0.283914 | 0.024929  | -0.642008 | P | -0.283858 | 0.025112  | -0.642196 |
| O | 0.156093  | -0.576578 | -1.928462 | O | 0.156006  | -0.576545 | -1.928629 |
| O | -0.716078 | -0.92756  | 0.549864  | O | -0.716487 | -0.927224 | 0.549619  |
| H | -0.1835   | -1.828547 | 0.649177  | H | -0.184075 | -1.828293 | 0.649369  |
| N | 0.610683  | -3.127173 | 0.977367  | N | 0.60958   | -3.126957 | 0.978303  |
| C | 3.332202  | 1.238088  | -1.243913 | C | 3.332495  | 1.237243  | -1.244103 |
| C | 3.235677  | 0.160984  | -2.13611  | C | 3.235692  | 0.160518  | -2.136721 |
| C | 4.399475  | 1.298778  | -0.338845 | C | 4.399687  | 1.29722   | -0.338887 |
| C | 4.215999  | -0.834085 | -2.122411 | C | 4.215711  | -0.834858 | -2.123361 |
| H | 2.383716  | 0.083189  | -2.839615 | H | 2.383743  | 0.083251  | -2.840294 |
| C | 5.369629  | 0.294712  | -0.338381 | C | 5.369495  | 0.292829  | -0.33872  |
| H | 4.471219  | 2.133733  | 0.378067  | H | 4.471624  | 2.131887  | 0.378344  |
| C | 5.287159  | -0.775793 | -1.229343 | C | 5.286782  | -0.777279 | -1.230148 |
| H | 6.05787   | -1.564986 | -1.227735 | H | 6.057253  | -1.566704 | -1.228767 |
| C | -4.020278 | 0.783631  | 0.491159  | C | -4.020013 | 0.784636  | 0.490673  |
| C | -4.614329 | 0.068711  | 1.540404  | C | -4.614407 | 0.069869  | 1.539832  |
| C | -4.356559 | 0.470758  | -0.834079 | C | -4.356082 | 0.471756  | -0.834616 |
| C | -5.544605 | -0.934639 | 1.262913  | C | -5.544788 | -0.933342 | 1.2622    |
| H | -4.340315 | 0.289398  | 2.585825  | H | -4.340569 | 0.290559  | 2.585298  |
| C | -5.289837 | -0.53368  | -1.094679 | C | -5.289439 | -0.532575 | -1.09536  |
| H | -3.875165 | 1.017028  | -1.665413 | H | -3.874456 | 1.017922  | -1.665885 |
| C | -5.8924   | -1.241642 | -0.052751 | C | -5.892334 | -1.240383 | -0.053523 |
| H | -6.631508 | -2.032123 | -0.267284 | H | -6.631504 | -2.030776 | -0.268165 |
| C | 0.533893  | -4.260088 | 0.346878  | C | 0.531899  | -4.260517 | 0.349078  |
| H | 1.226319  | -5.07554  | 0.59767   | H | 1.223585  | -5.076263 | 0.600961  |
| C | -0.434203 | -4.590967 | -0.707535 | C | -0.43627  | -4.591892 | -0.705121 |
| C | -0.261845 | -5.805375 | -1.374128 | C | -0.265553 | -5.807922 | -1.369184 |
| C | -1.541455 | -3.753017 | -1.085035 | C | -1.541922 | -3.752874 | -1.084954 |
| C | -1.131396 | -6.19625  | -2.394171 | C | -1.135224 | -6.199456 | -2.38887  |

|   |           |           |           |   |           |           |           |
|---|-----------|-----------|-----------|---|-----------|-----------|-----------|
| H | 0.576206  | -6.467567 | -1.10355  | H | 0.571248  | -6.47096  | -1.096812 |
| C | -2.390433 | -4.157399 | -2.10276  | C | -2.391048 | -4.157947 | -2.102282 |
| H | -1.708865 | -2.812855 | -0.569263 | H | -1.708027 | -2.811339 | -0.571283 |
| C | -2.190588 | -5.374703 | -2.761897 | C | -2.192885 | -5.376931 | -2.758815 |
| H | -0.969603 | -7.155557 | -2.907787 | H | -0.974746 | -7.160081 | -2.900433 |
| H | -3.22984  | -3.508711 | -2.404032 | H | -3.229233 | -3.508485 | -2.405299 |
| H | -2.872137 | -5.676504 | -3.571412 | H | -2.874535 | -5.67928  | -3.568041 |
| C | 1.574201  | -2.917229 | 1.992557  | C | 1.57332   | -2.916694 | 1.993229  |
| C | 2.651323  | -3.775174 | 2.259974  | C | 2.650031  | -3.774993 | 2.261174  |
| C | 1.441944  | -1.730651 | 2.797995  | C | 1.441814  | -1.729397 | 2.797729  |
| C | 3.56122   | -3.503936 | 3.281703  | C | 3.560207  | -3.503433 | 3.282568  |
| H | 2.822153  | -4.6836   | 1.660703  | H | 2.820325  | -4.683957 | 1.662566  |
| C | 2.338292  | -1.466878 | 3.812837  | C | 2.33843   | -1.465308 | 3.812253  |
| H | 0.622753  | -1.045935 | 2.590162  | H | 0.622981  | -1.044389 | 2.589458  |
| C | 3.404406  | -2.357511 | 4.061767  | C | 3.404098  | -2.356315 | 4.061754  |
| H | 4.394257  | -4.199343 | 3.456823  | H | 4.39291   | -4.199134 | 3.458112  |
| H | 2.238644  | -0.56382  | 4.433827  | H | 2.239348  | -0.561704 | 4.432539  |
| C | 6.54297   | 0.373927  | 0.630237  | C | 6.542798  | 0.371109  | 0.630019  |
| C | 4.11649   | -2.013646 | -3.08414  | C | 4.115989  | -2.013897 | -3.08571  |
| C | -6.202605 | -1.690238 | 2.411765  | C | -6.203164 | -1.688762 | 2.410955  |
| C | -5.653876 | -0.878392 | -2.534484 | C | -5.653158 | -0.877355 | -2.53523  |
| F | 6.289574  | 1.076967  | 1.782347  | F | 6.290559  | 1.076086  | 1.781194  |
| F | 7.660746  | 0.98005   | 0.107683  | F | 7.661817  | 0.974427  | 0.10688   |
| F | 6.999828  | -0.844639 | 1.071264  | F | 6.997266  | -0.84777  | 1.072659  |
| F | 5.333494  | -2.509143 | -3.491869 | F | 5.332913  | -2.509733 | -3.493268 |
| F | 3.473818  | -3.110231 | -2.562908 | F | 3.472626  | -3.110461 | -2.565304 |
| F | 3.454535  | -1.746904 | -4.255151 | F | 3.454583  | -1.746224 | -4.256823 |
| F | -6.579657 | -2.975167 | 2.10743   | F | -6.580345 | -2.973655 | 2.106626  |
| F | -7.354632 | -1.102952 | 2.878431  | F | -7.355208 | -1.101268 | 2.877319  |
| F | -5.41751  | -1.821793 | 3.530929  | F | -5.418346 | -1.820358 | 3.530309  |
| F | -6.962164 | -1.259611 | -2.711187 | F | -6.961419 | -1.258535 | -2.71222  |
| F | -4.929318 | -1.92257  | -3.058687 | F | -4.928513 | -1.92159  | -3.059204 |
| F | -5.474626 | 0.143937  | -3.432244 | F | -5.473659 | 0.144915  | -3.433008 |
| O | 4.230131  | -1.995196 | 5.10369   | O | 4.230153  | -1.993613 | 5.10328   |
| C | 5.358501  | -2.832813 | 5.334502  | C | 5.358059  | -2.831698 | 5.334663  |
| H | 6.014657  | -2.869249 | 4.431386  | H | 6.014132  | -2.8692   | 4.431529  |
| H | 5.883716  | -2.329515 | 6.185652  | H | 5.883619  | -2.328041 | 6.185389  |
| H | 5.030897  | -3.860438 | 5.625055  | H | 5.029891  | -3.858911 | 5.62603   |
